# Supplementary material for: Targeting Lactobacillus johnsonii to reverse chronic kidney disease
Source: PubMed Central journal article supplement (PMC11298530; doi:10.1038/s41392-024-01913-1), 2024-08-05

**Figure 4d**

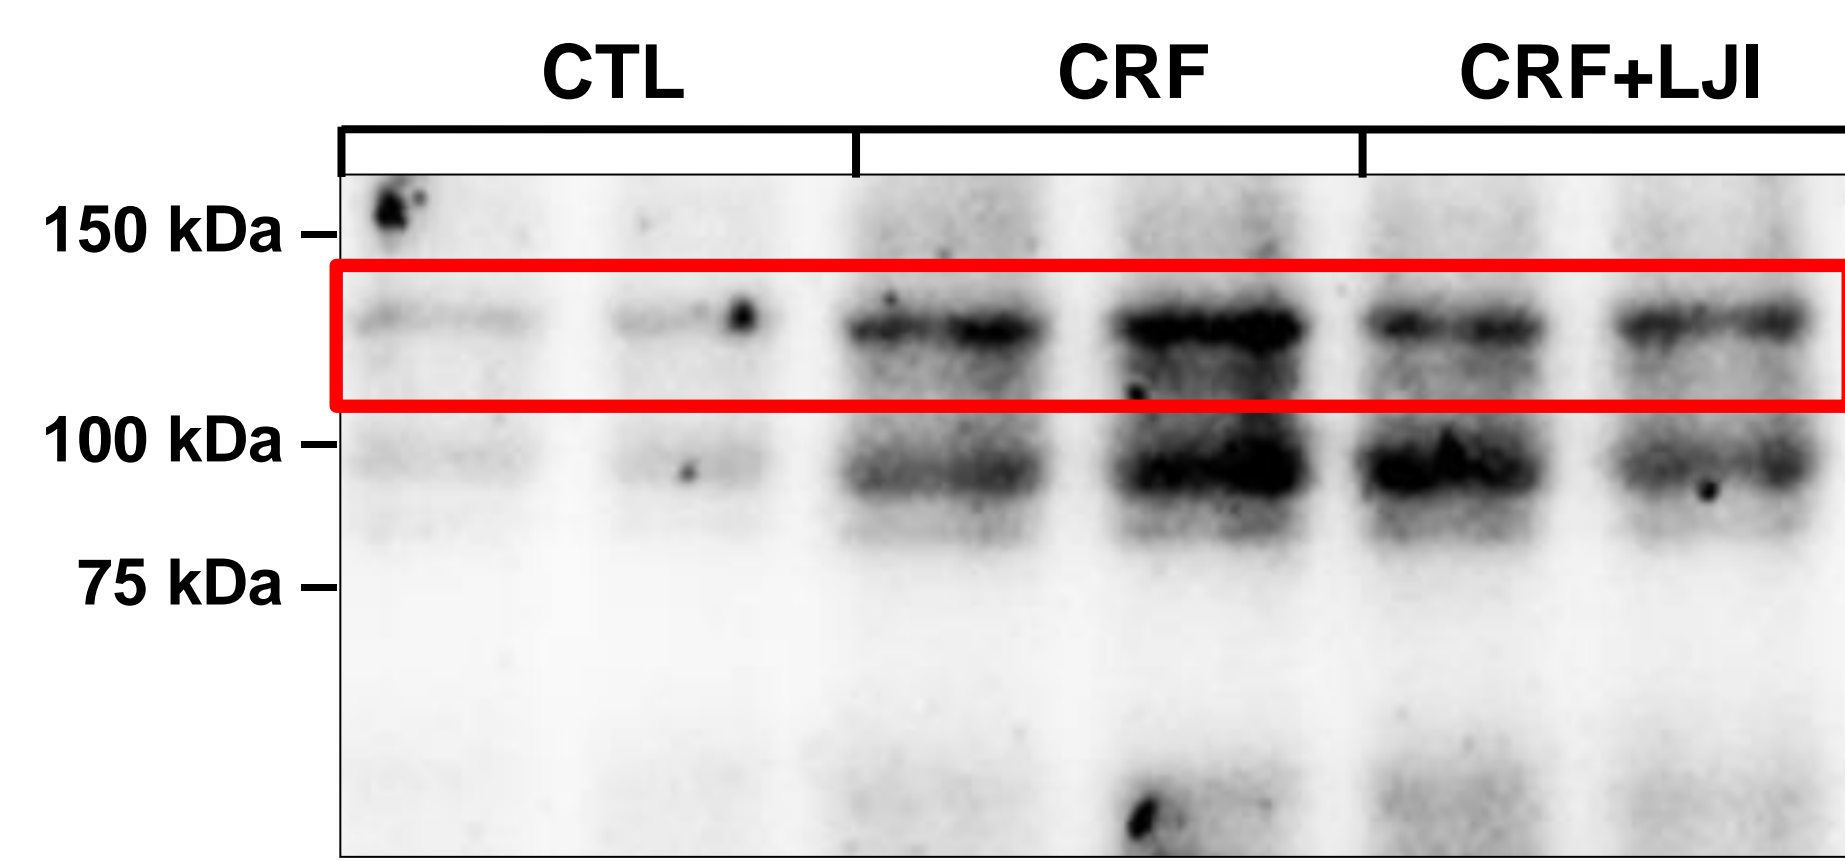

**Collagen I**

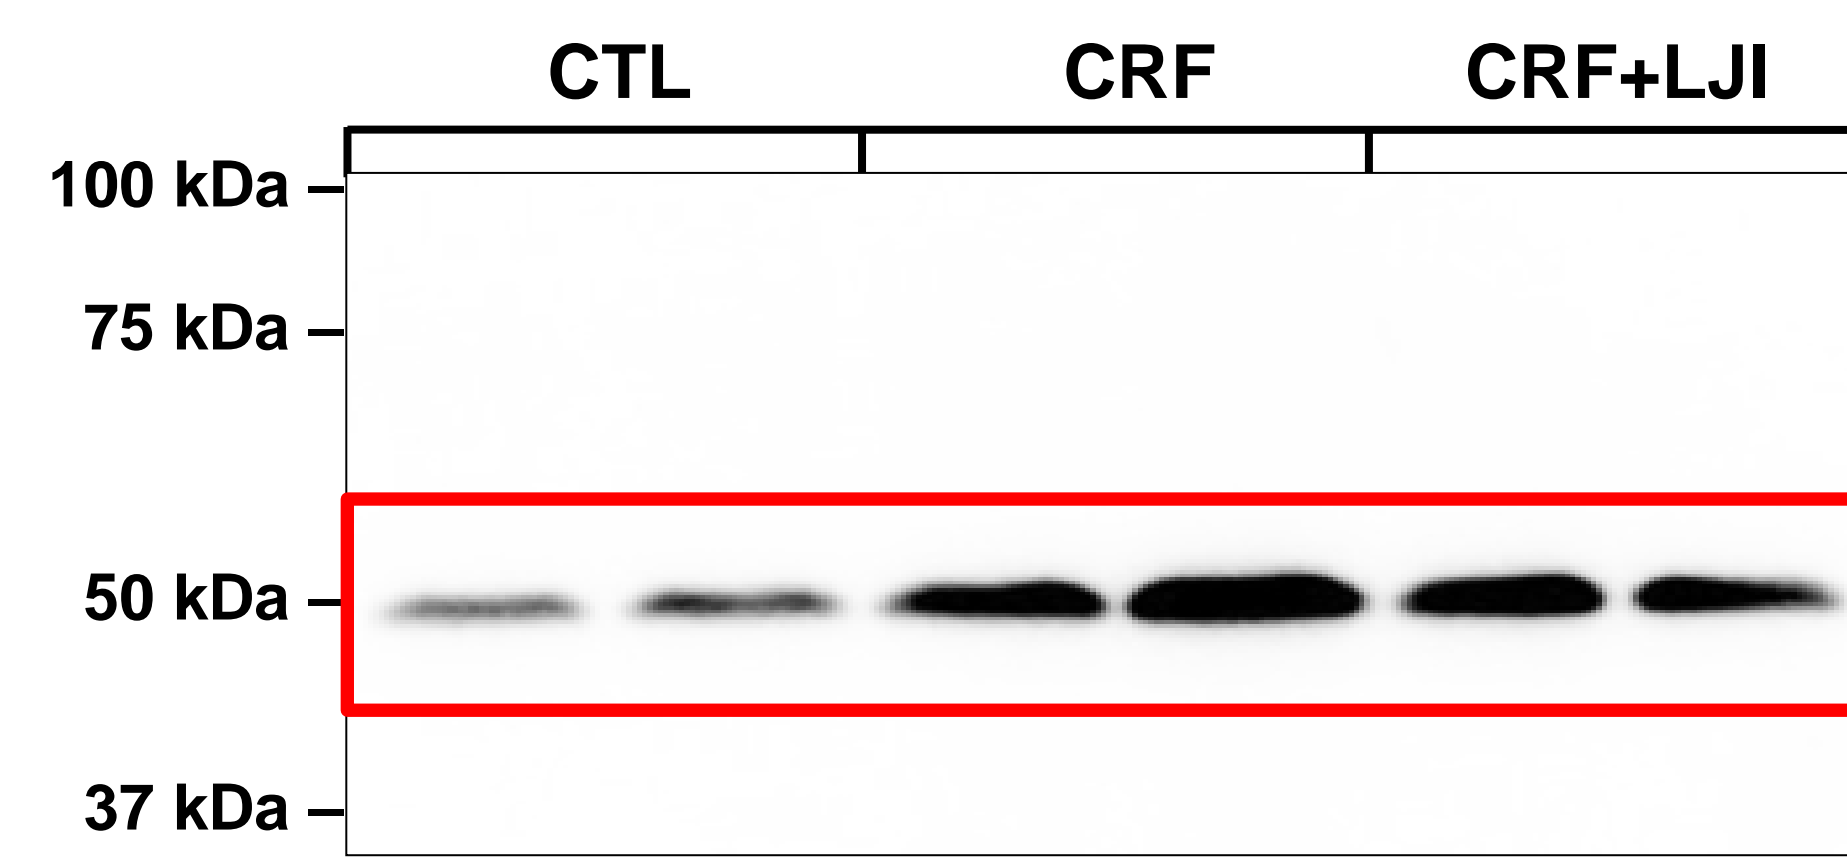

**$\alpha$ -SMA**

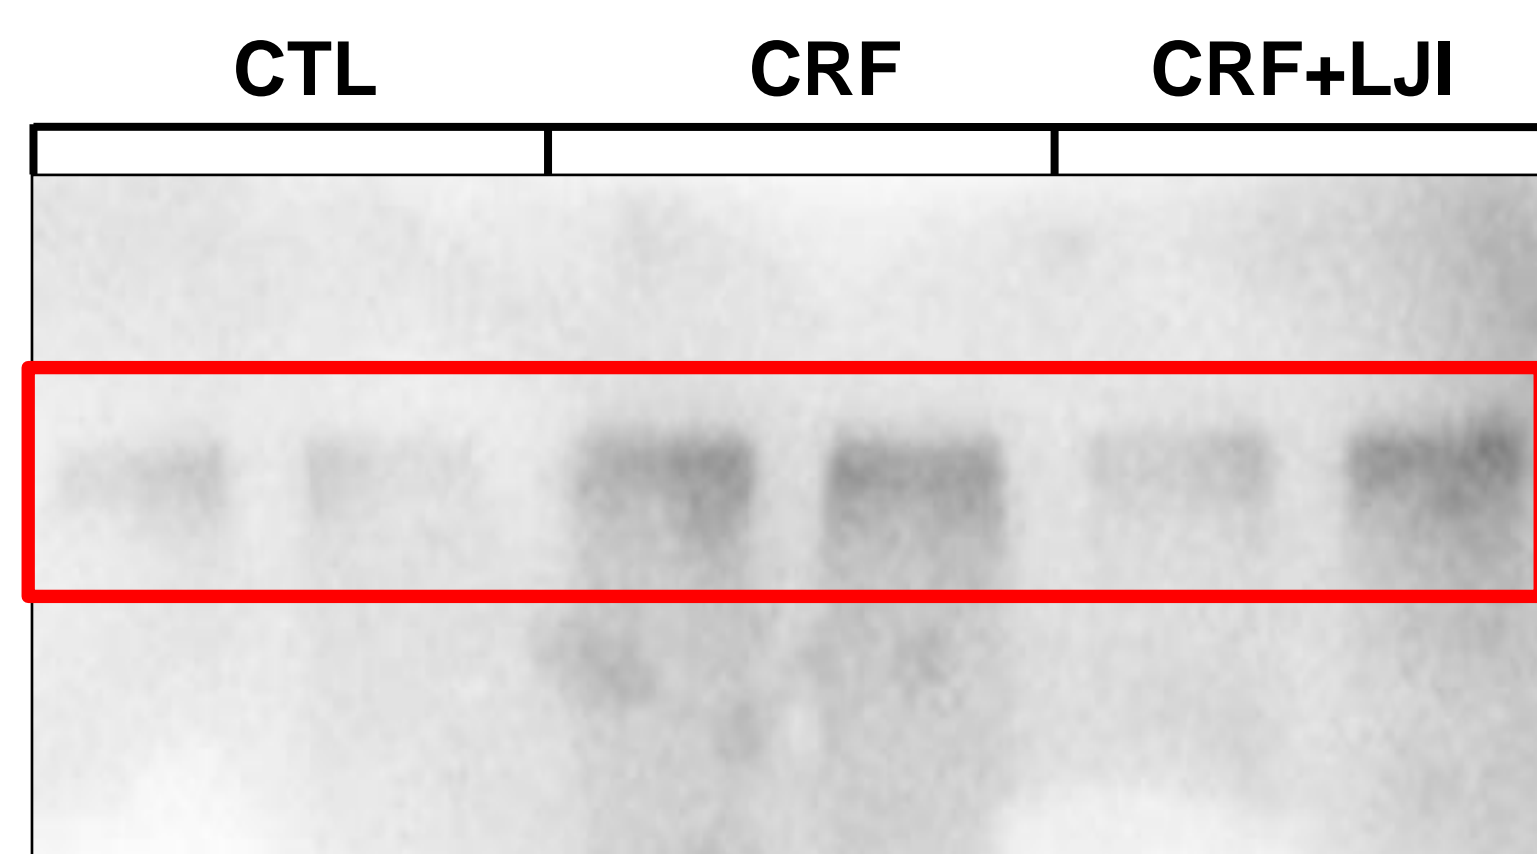

**Fibronectin**

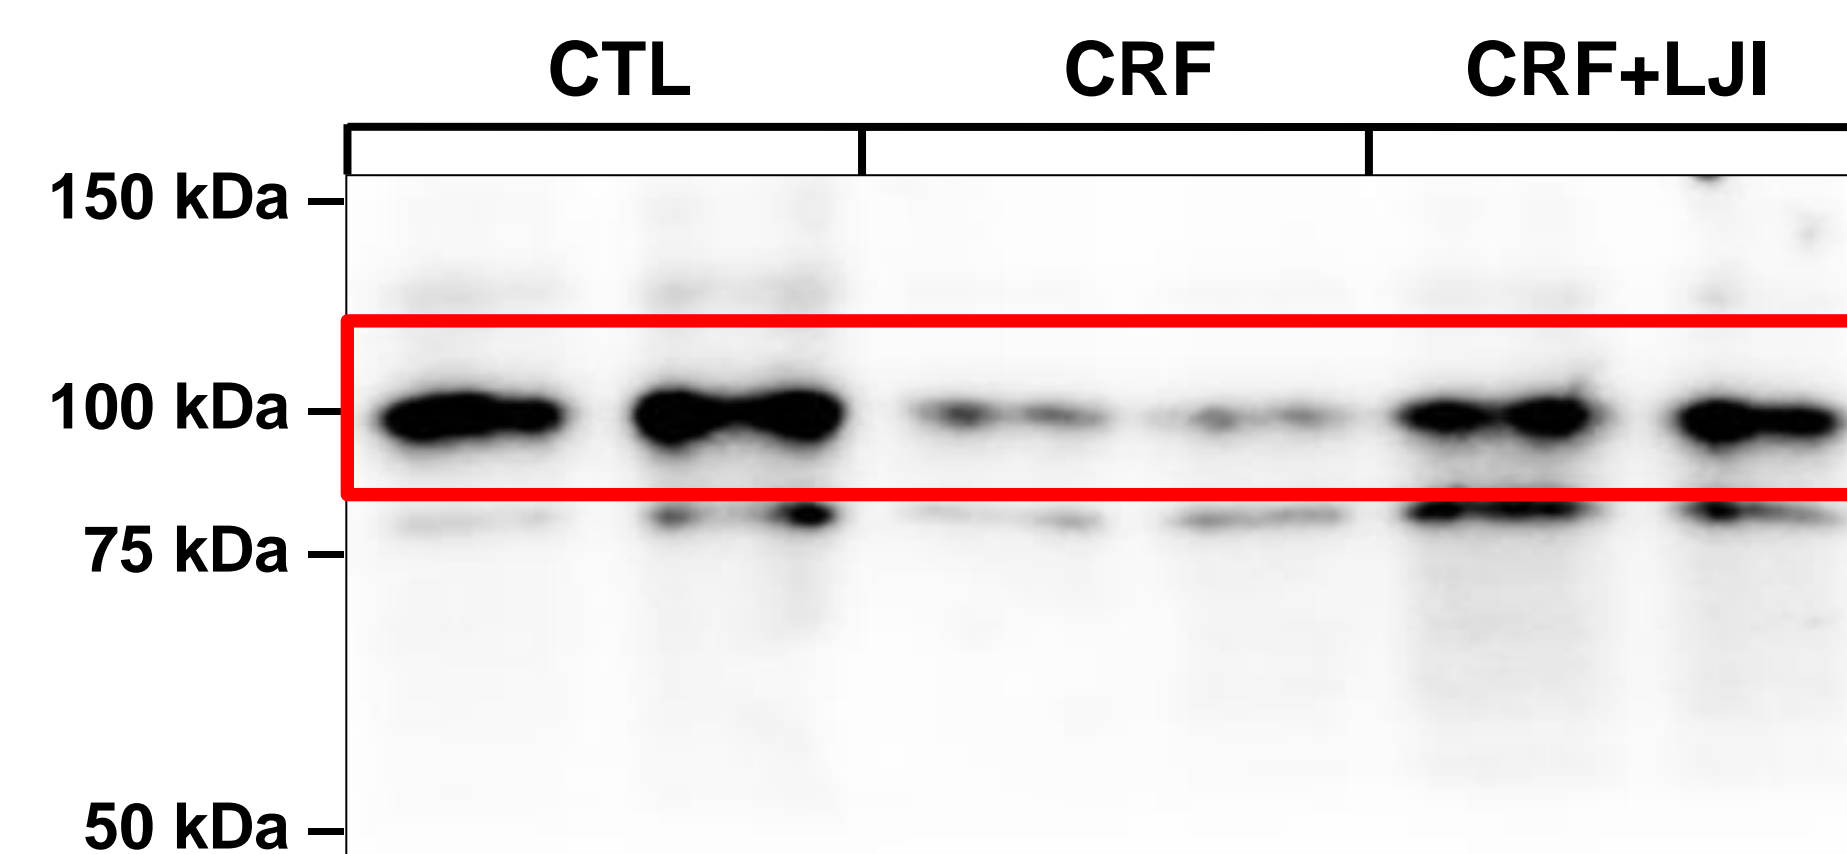

**E-Cadherin**

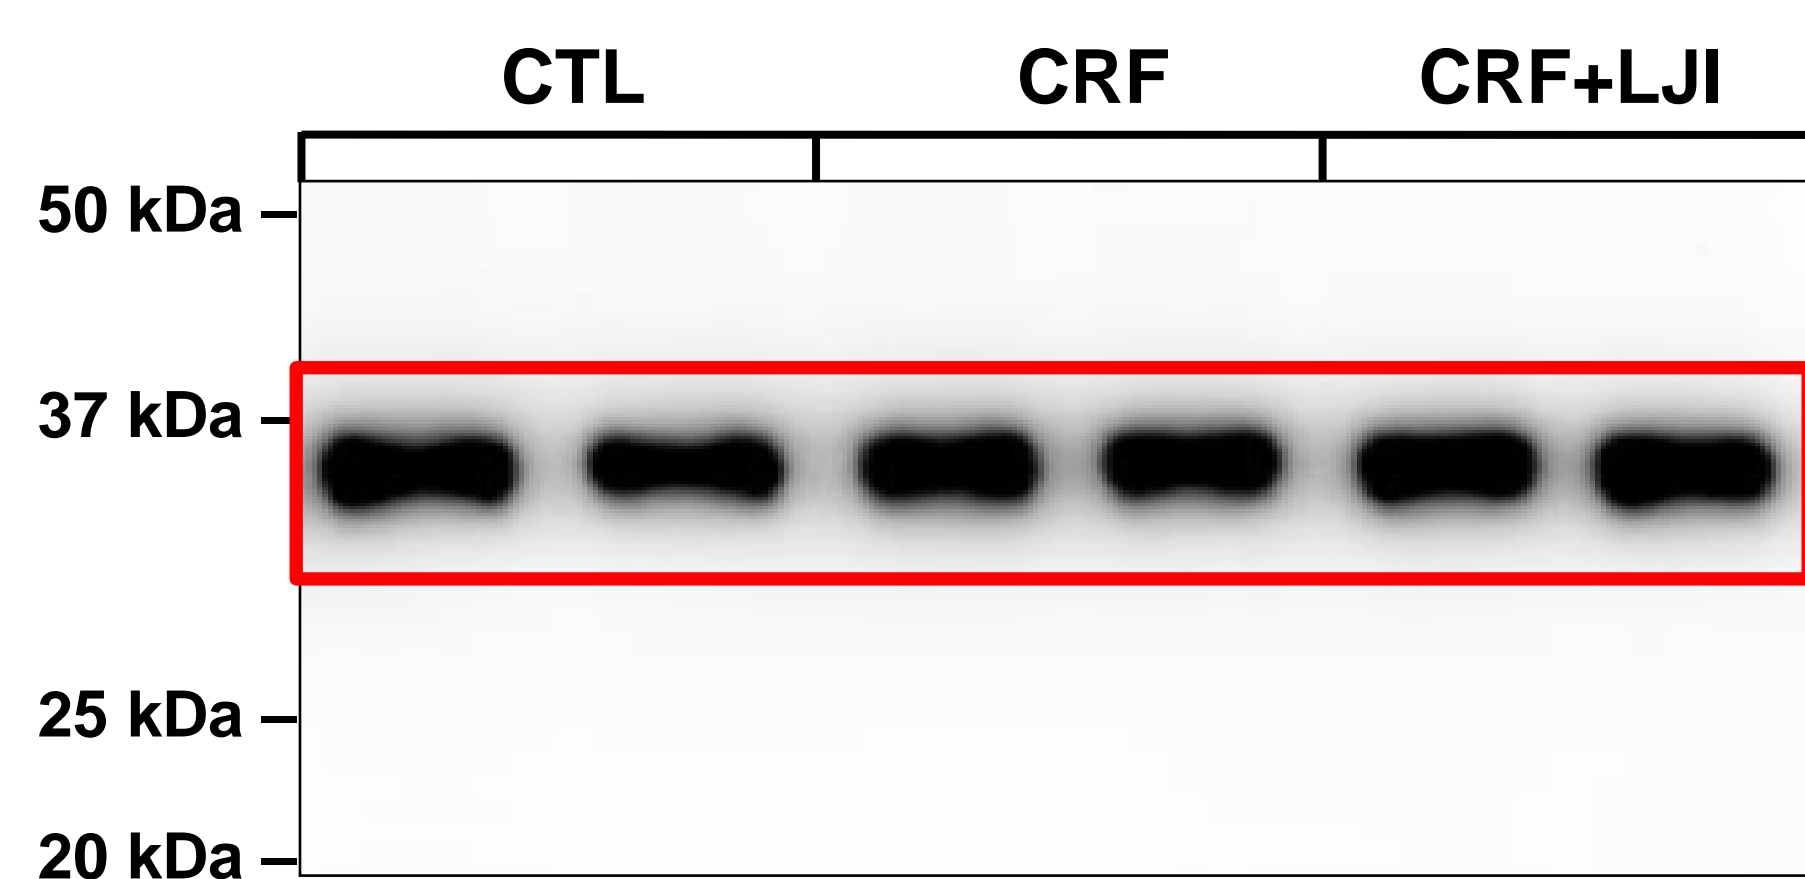

**GAPDH**

**Figure 4f**

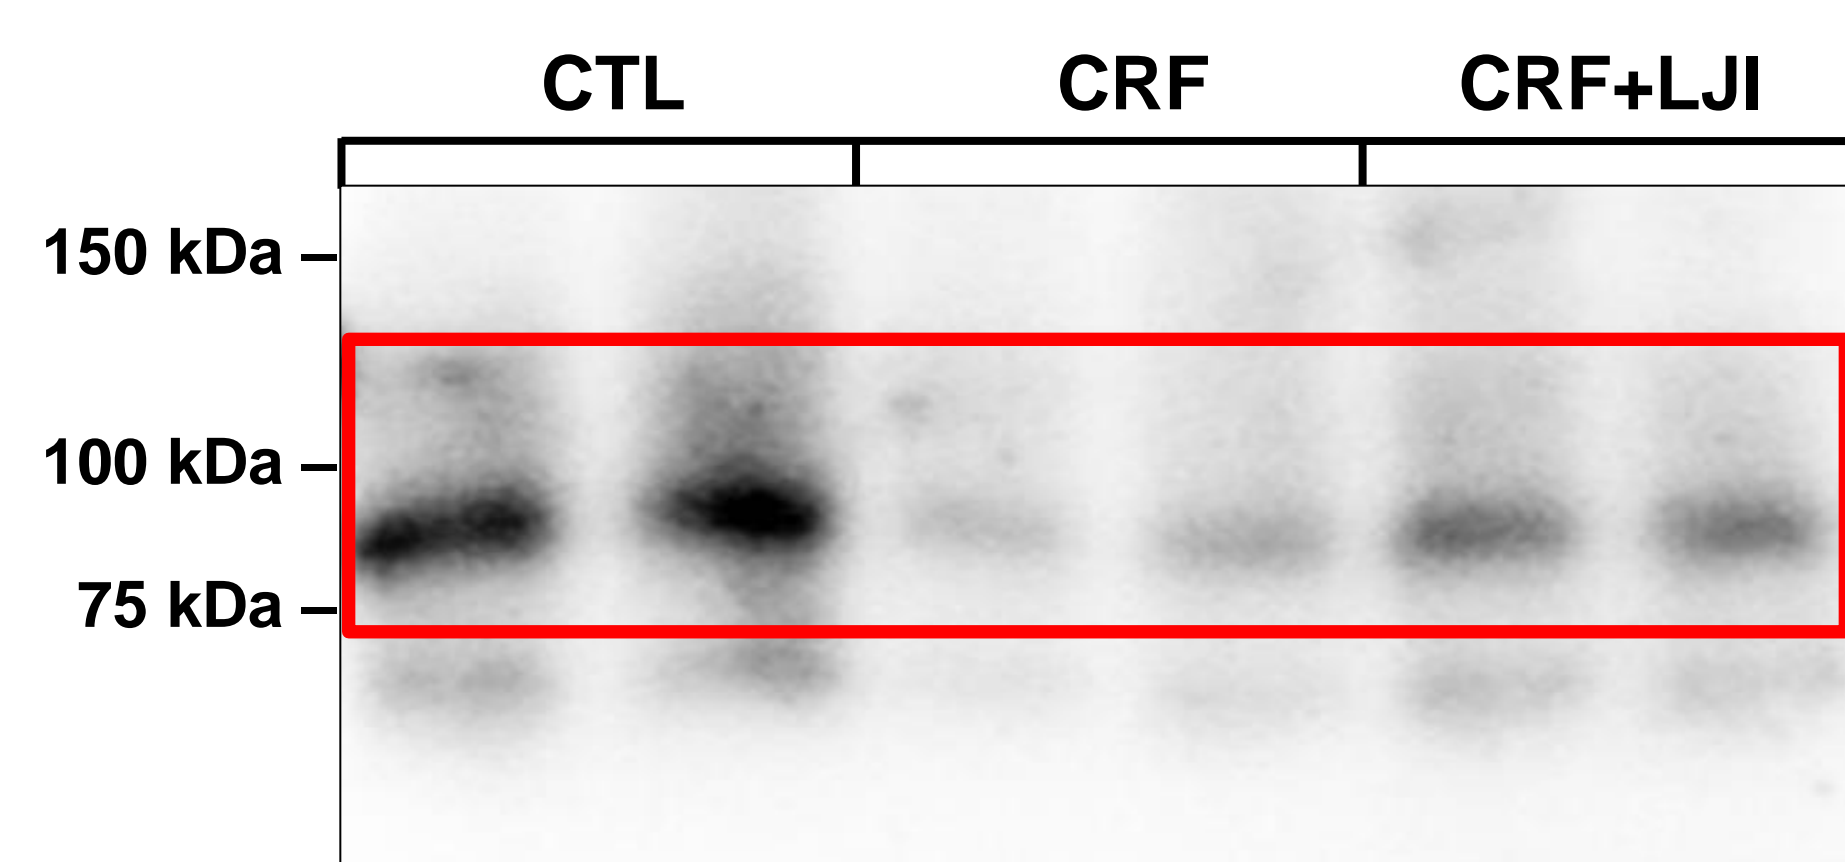

**ZO1**

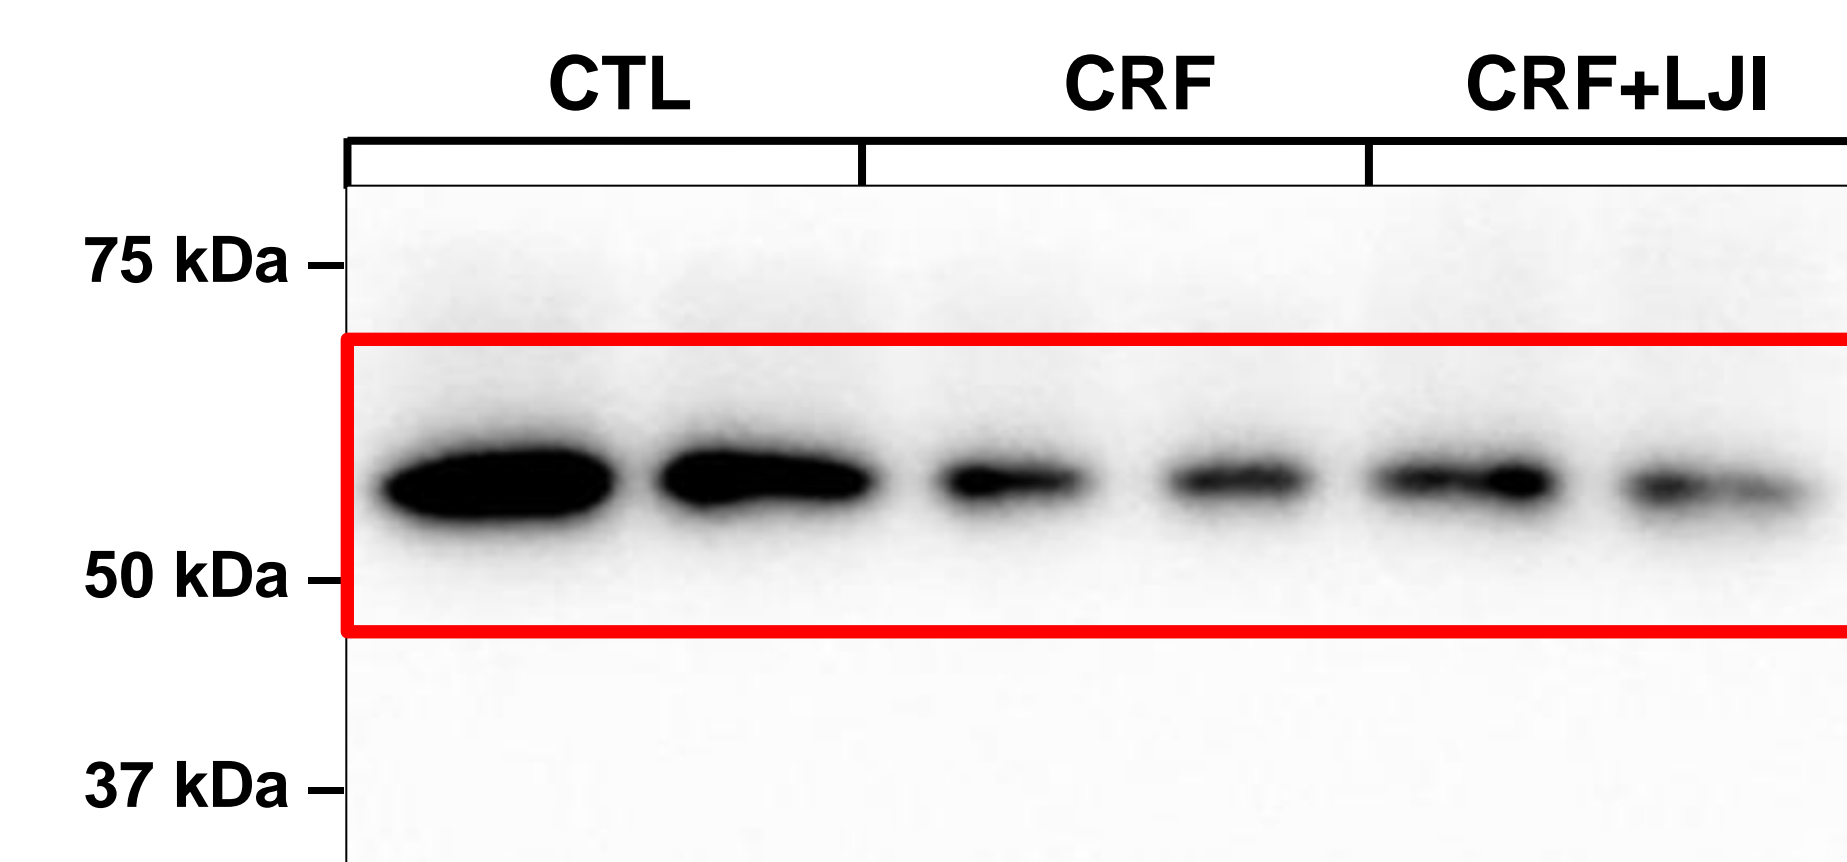

**Occludin**

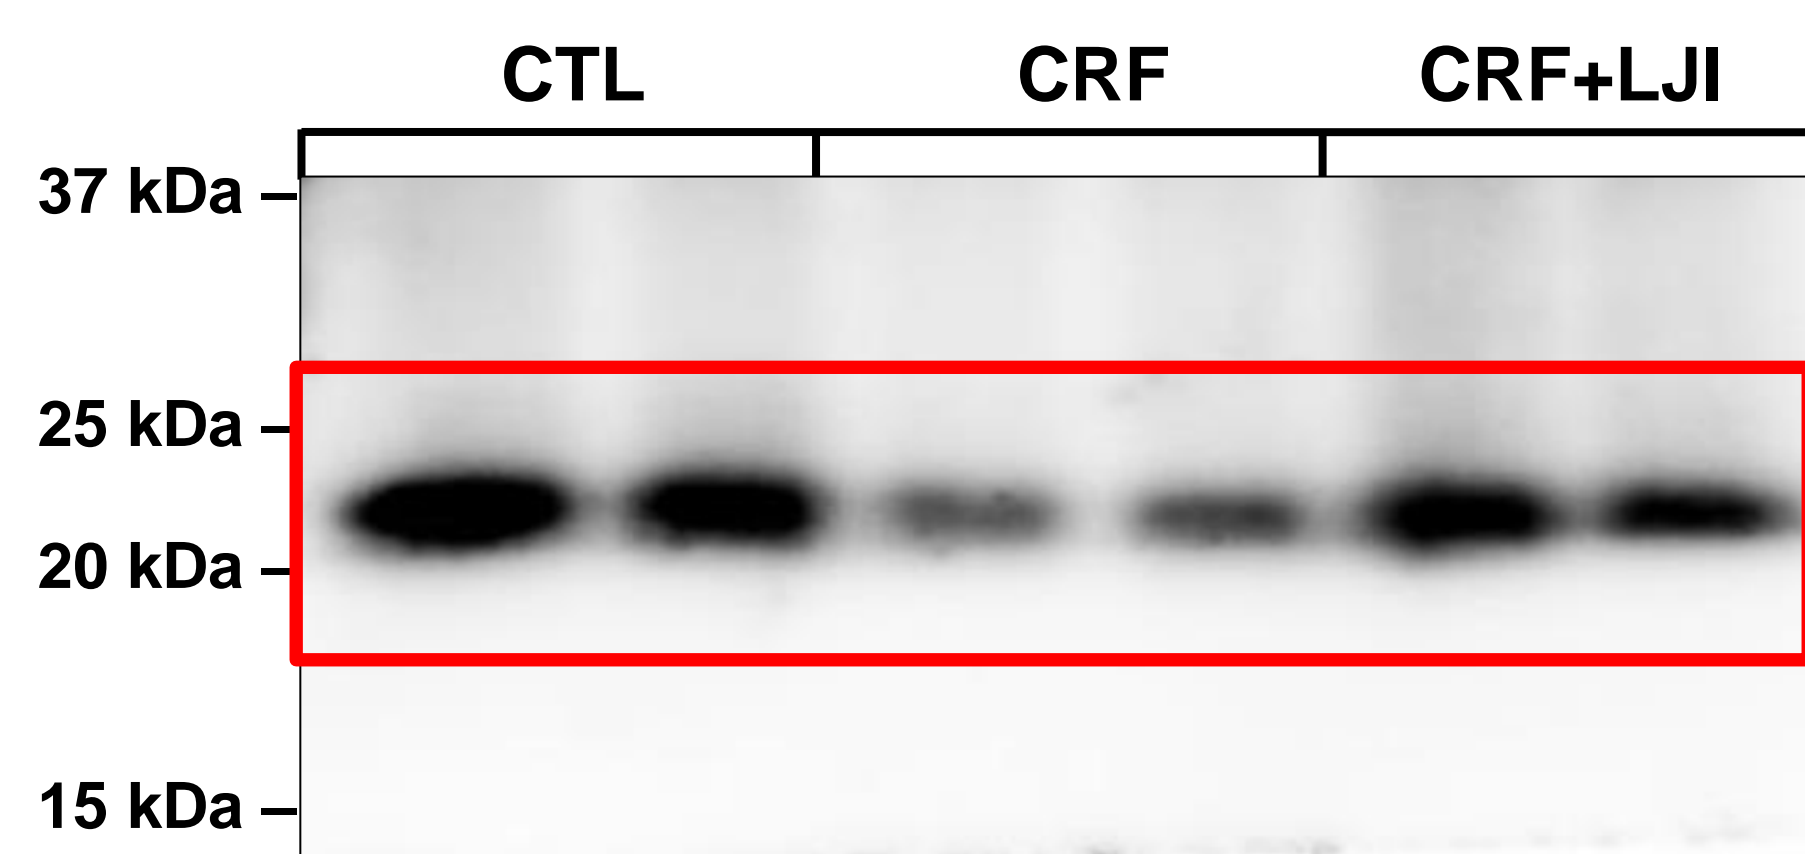

**Claudin-1**

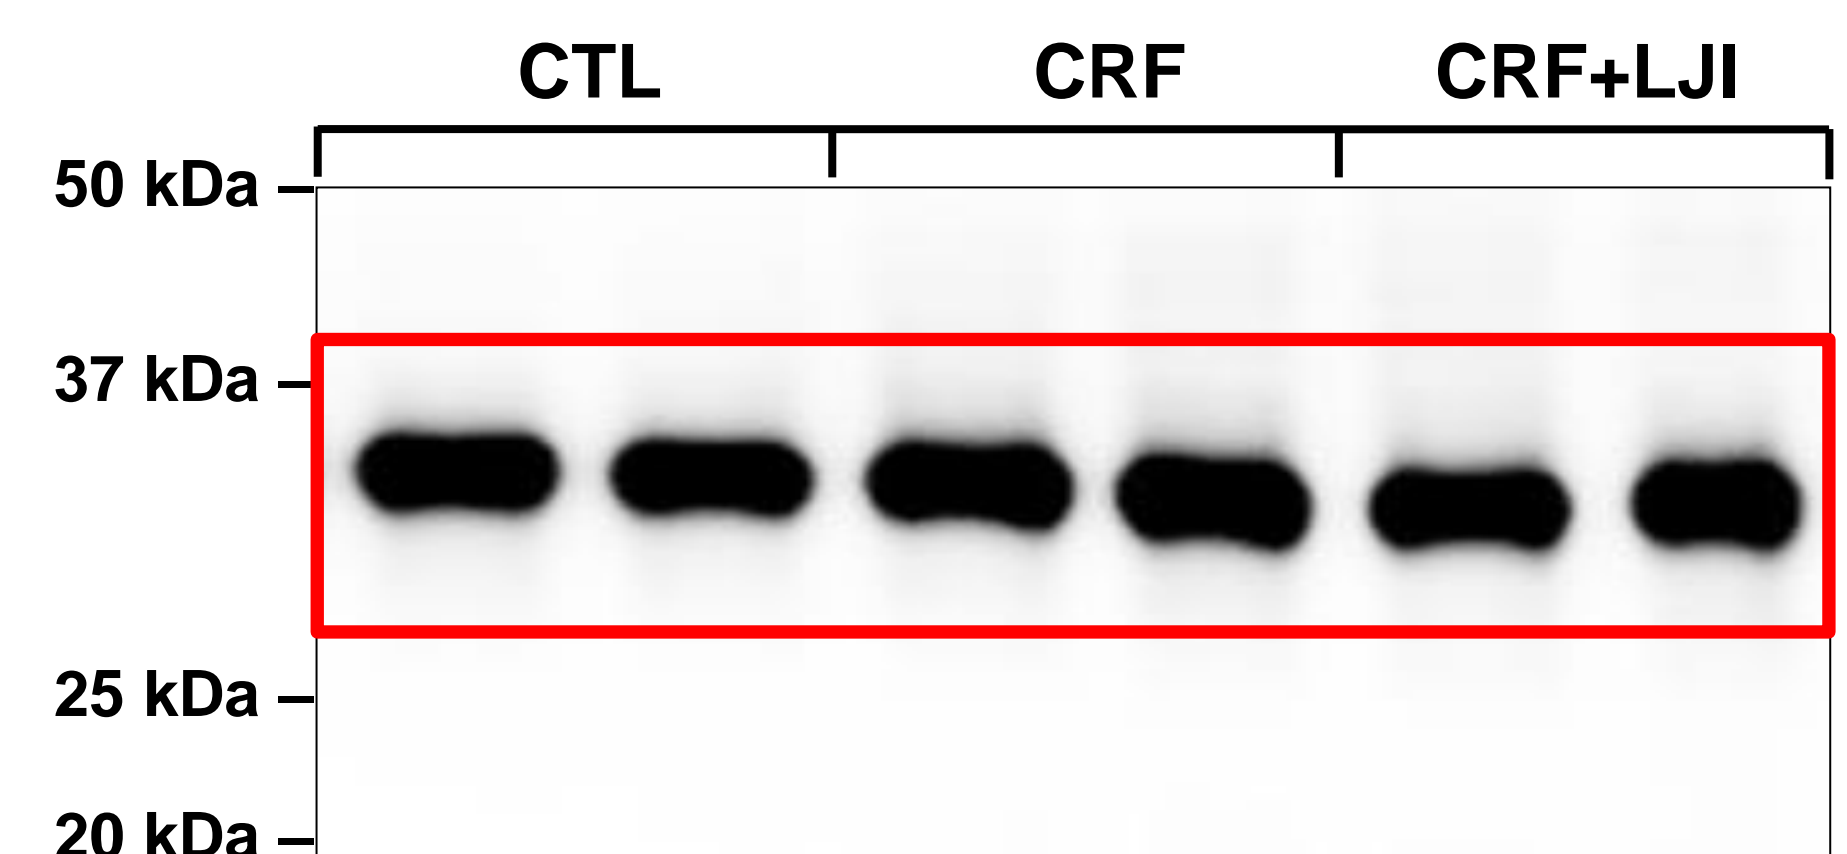

**GAPDH**

**Figure 8e**

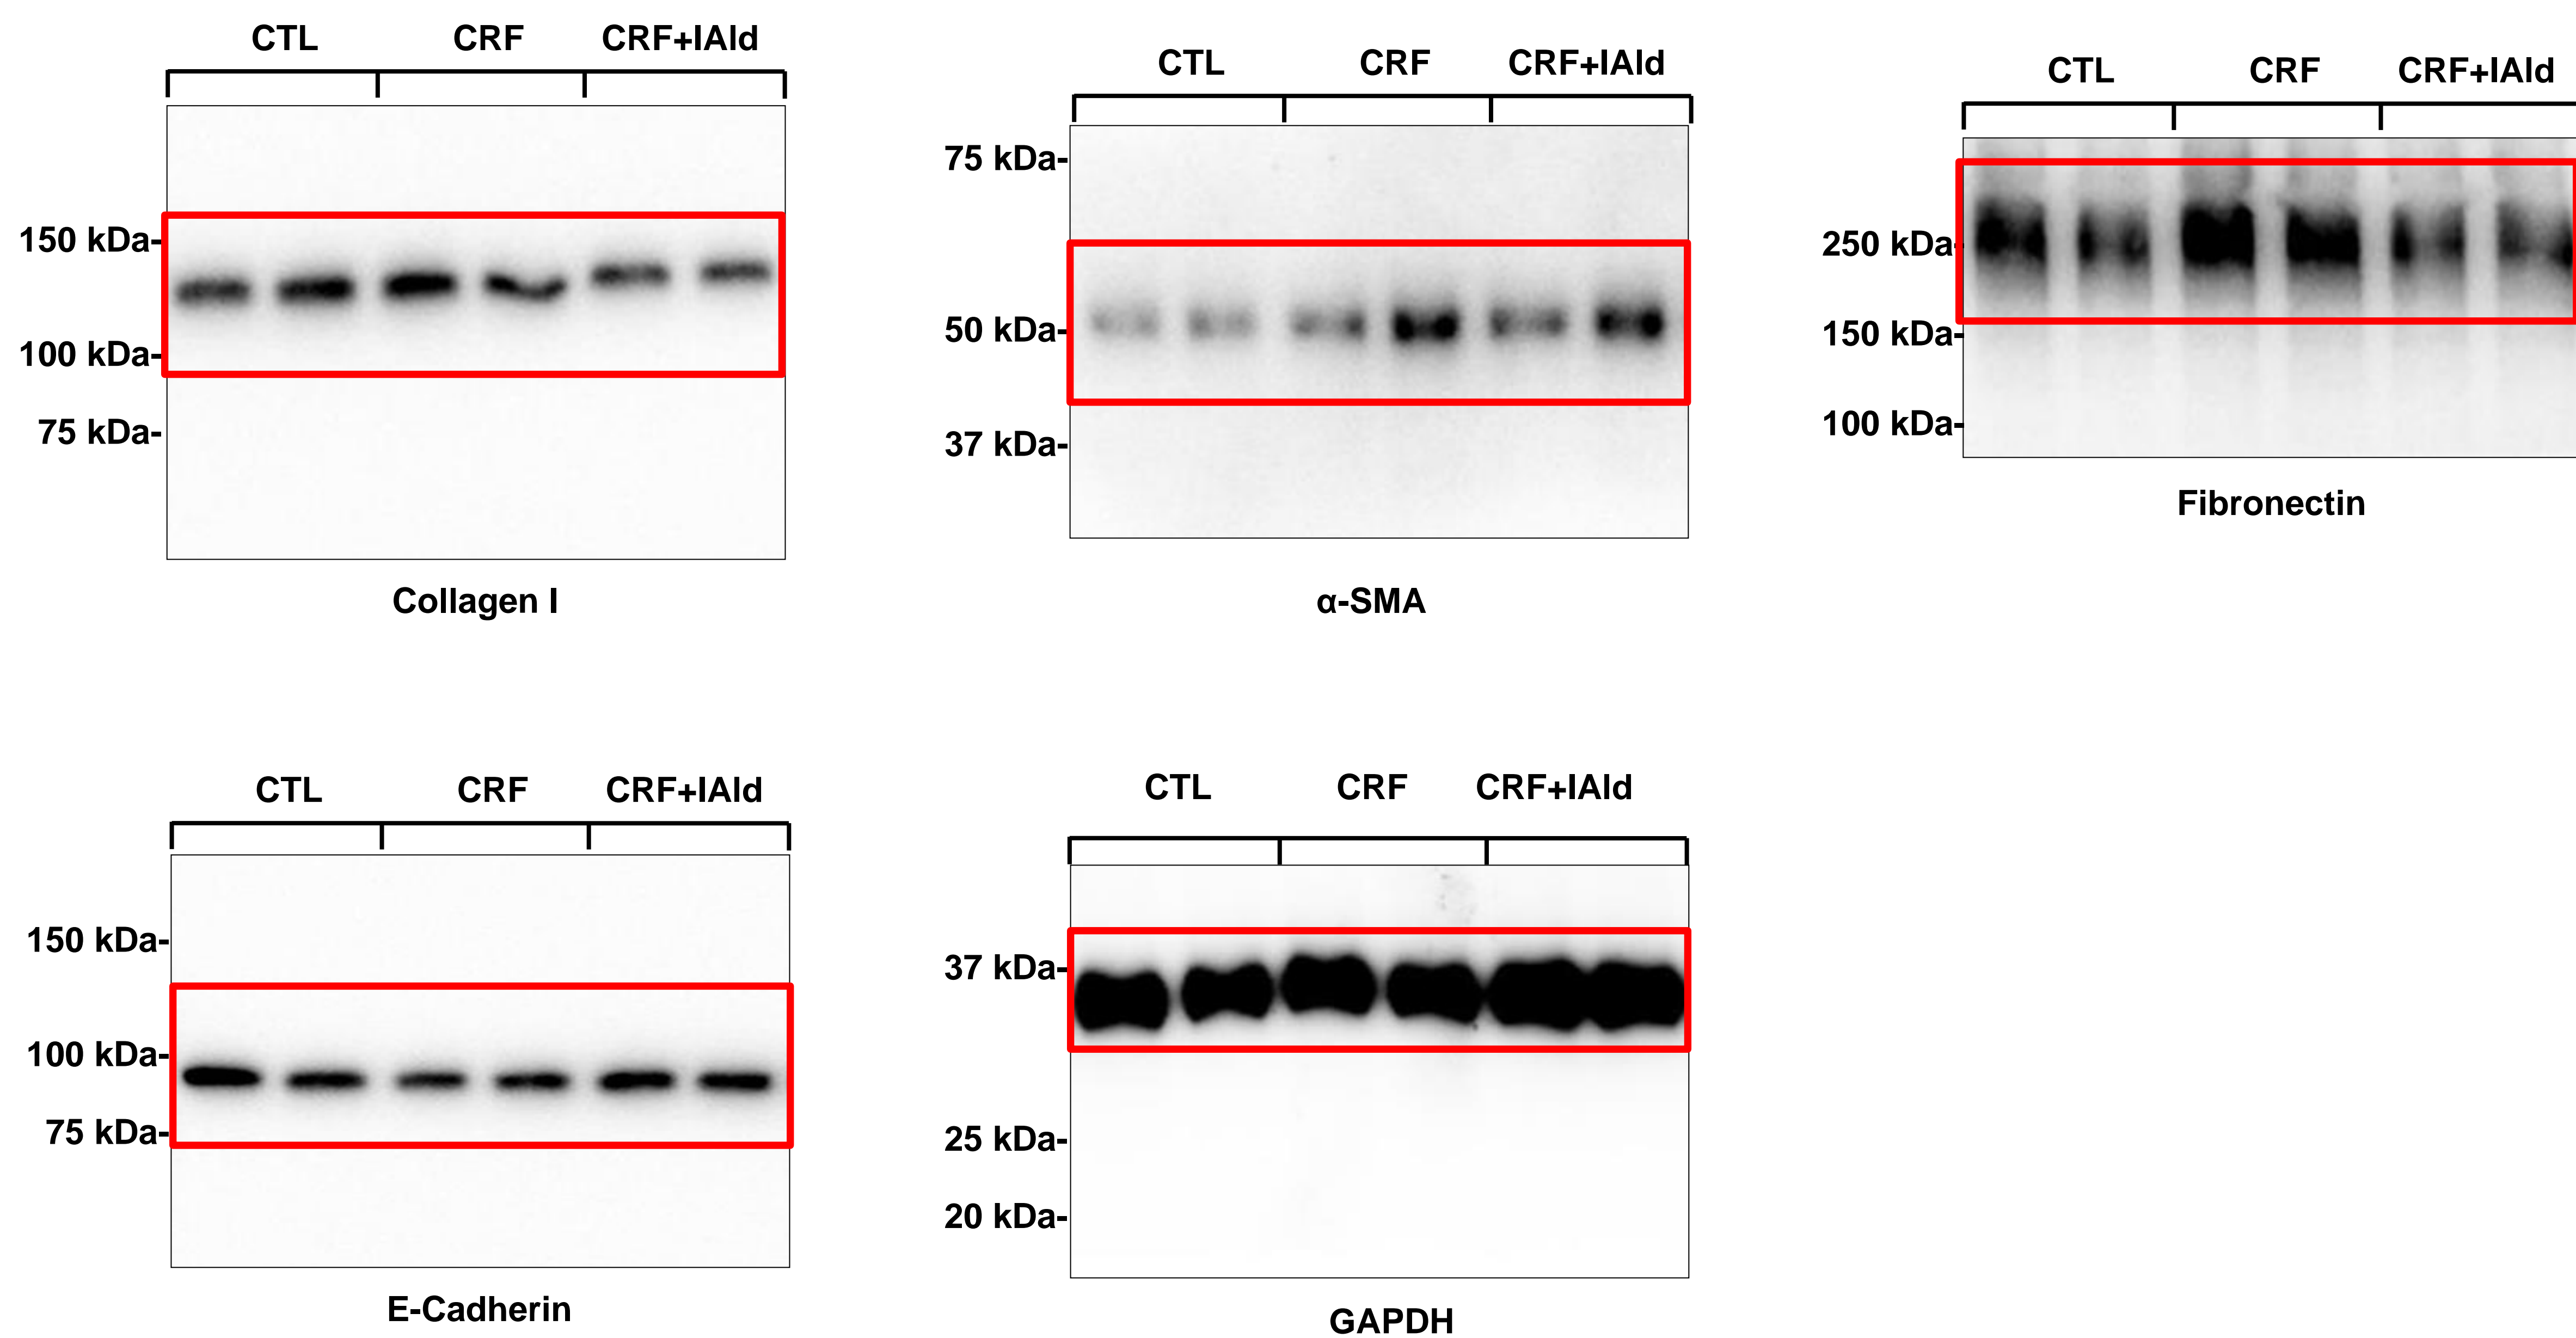

**Figure 8g**

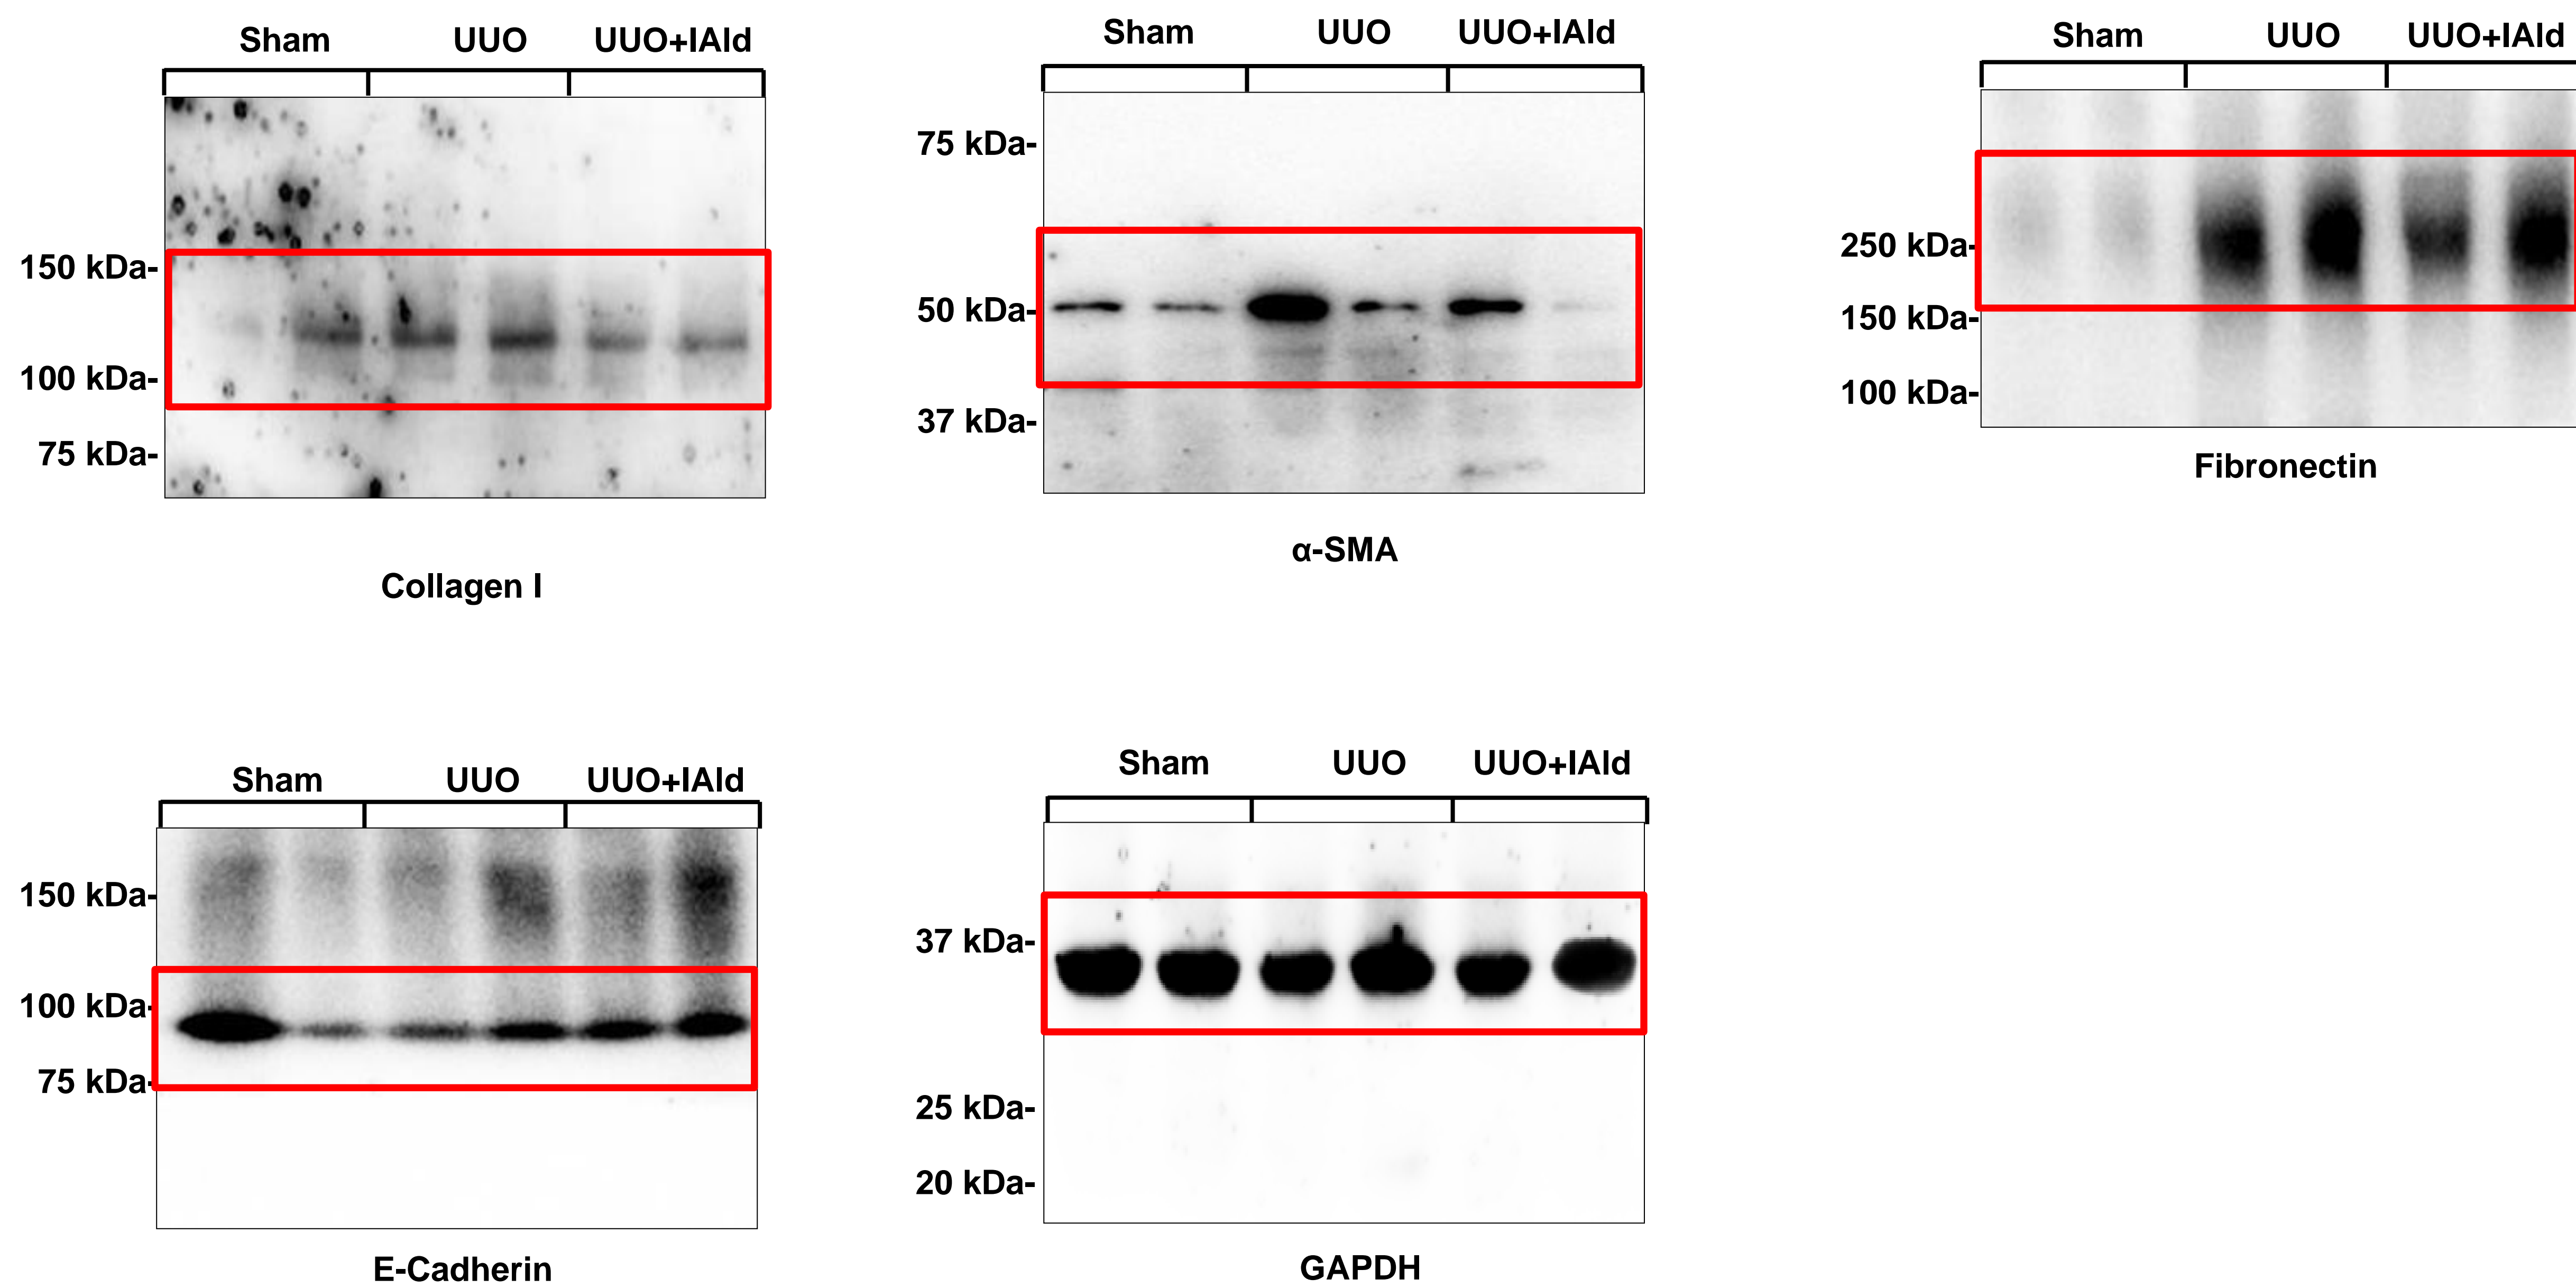

**Figure 8k**

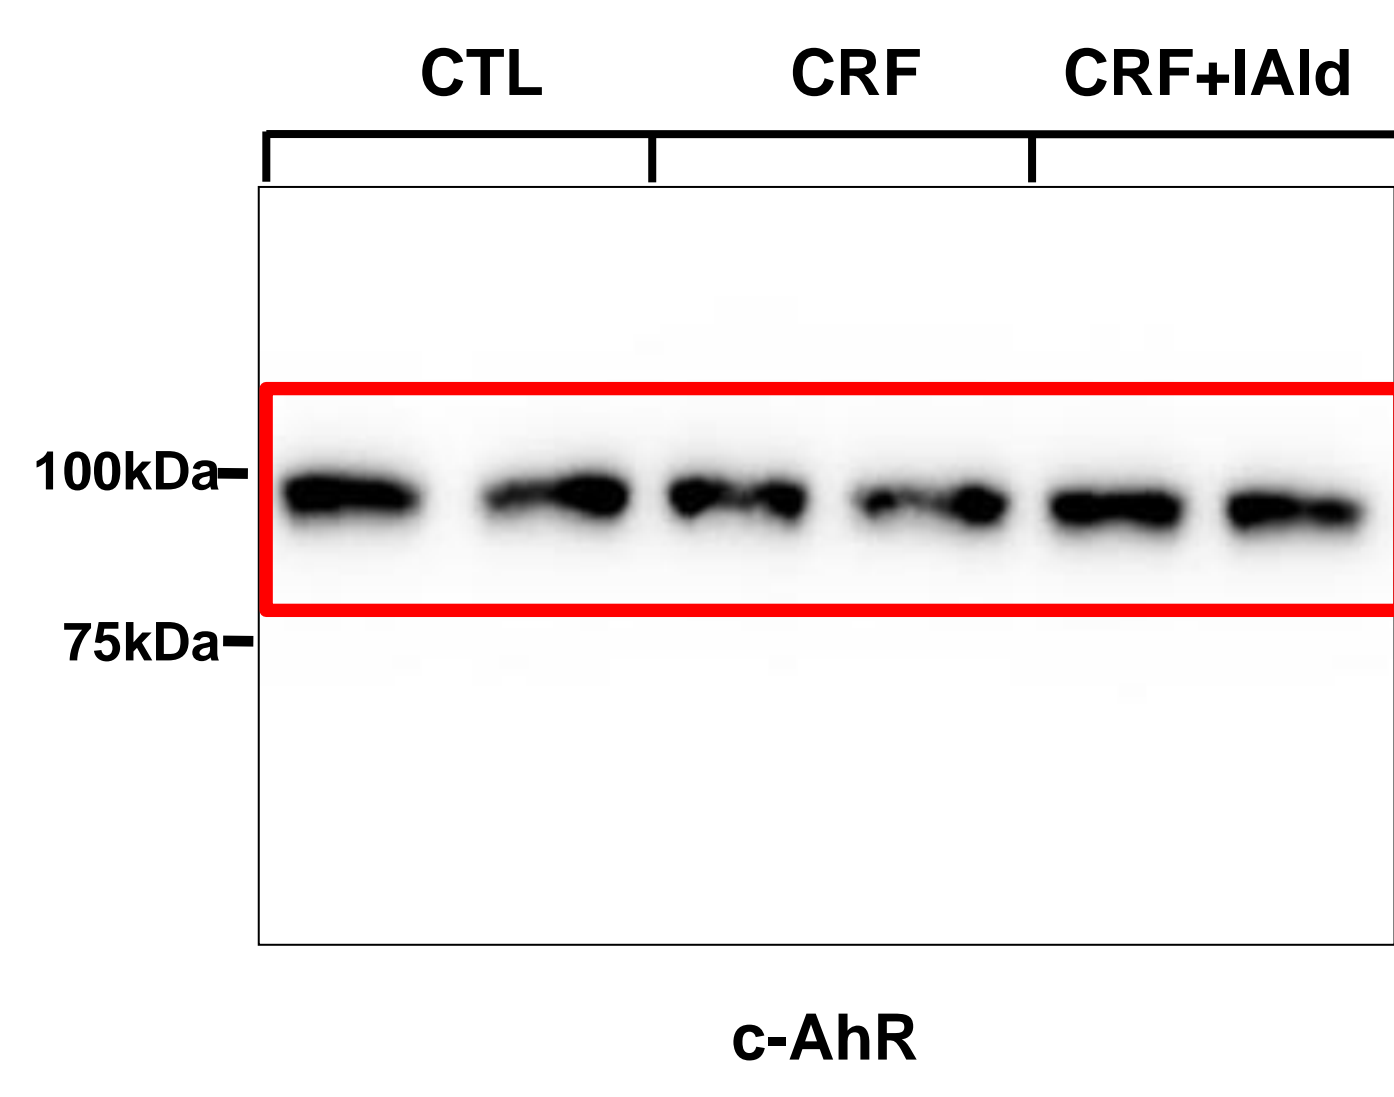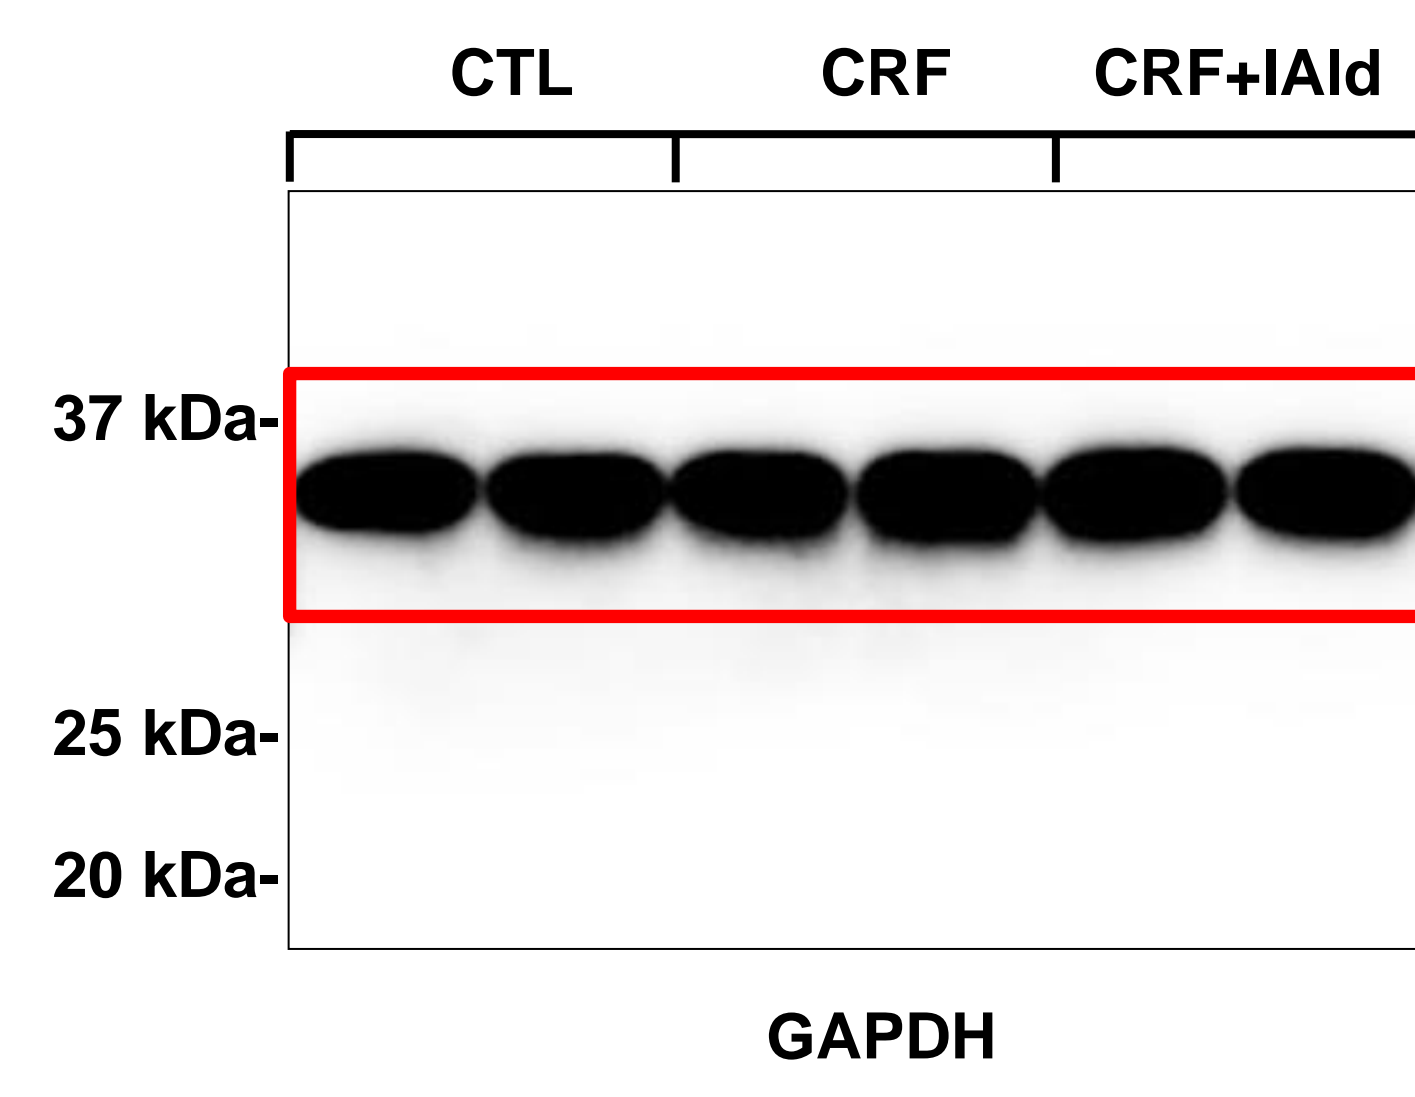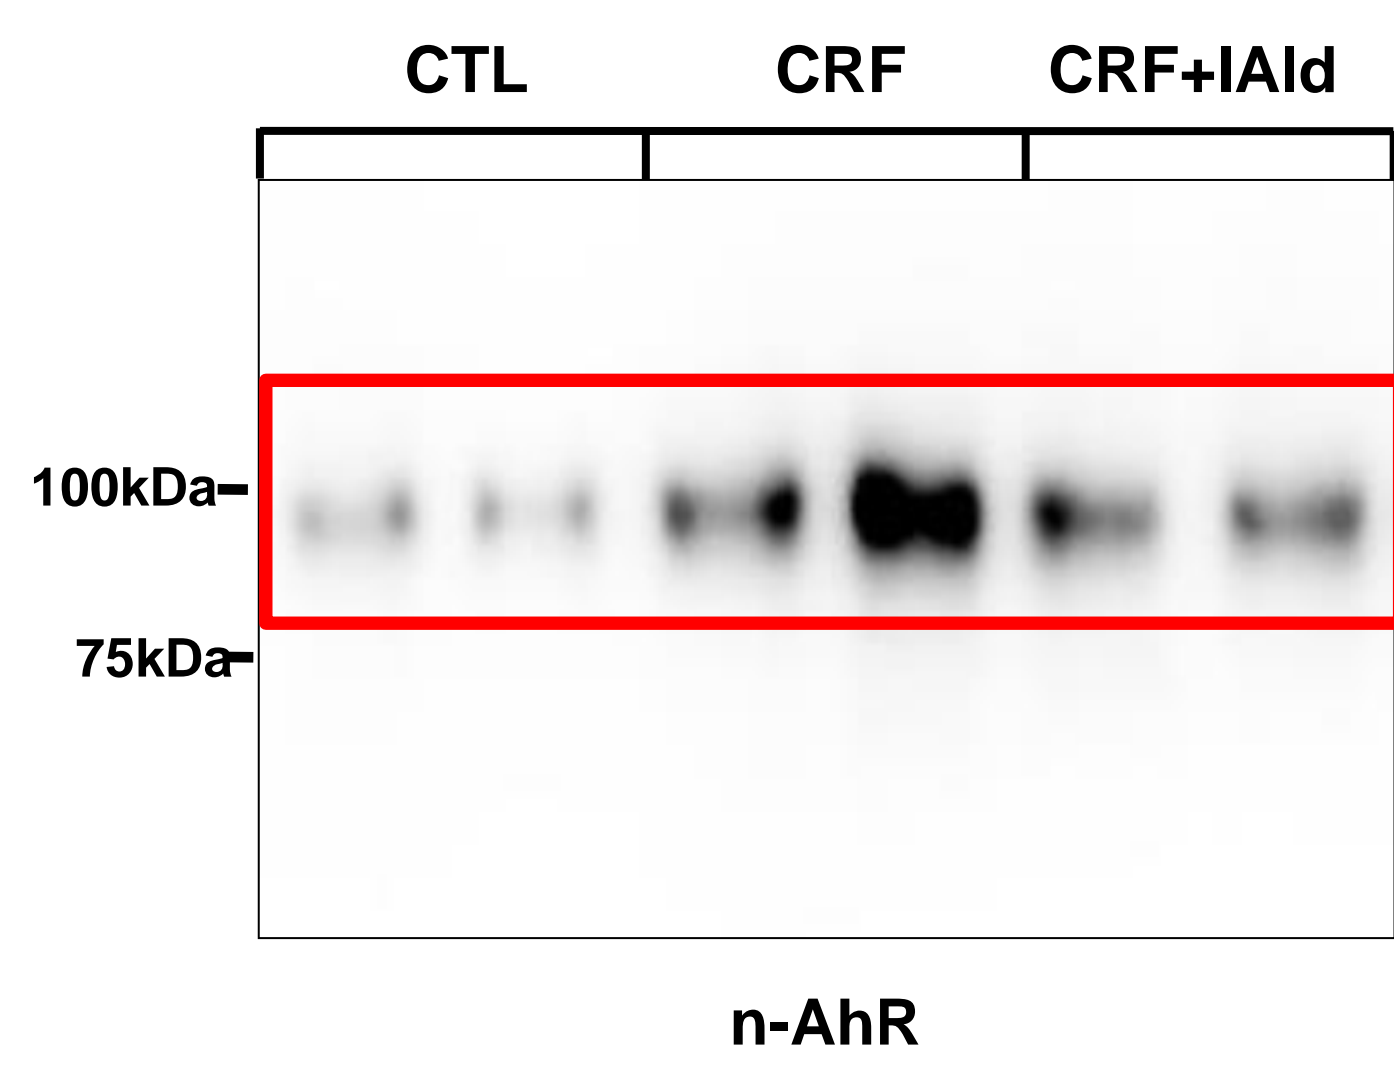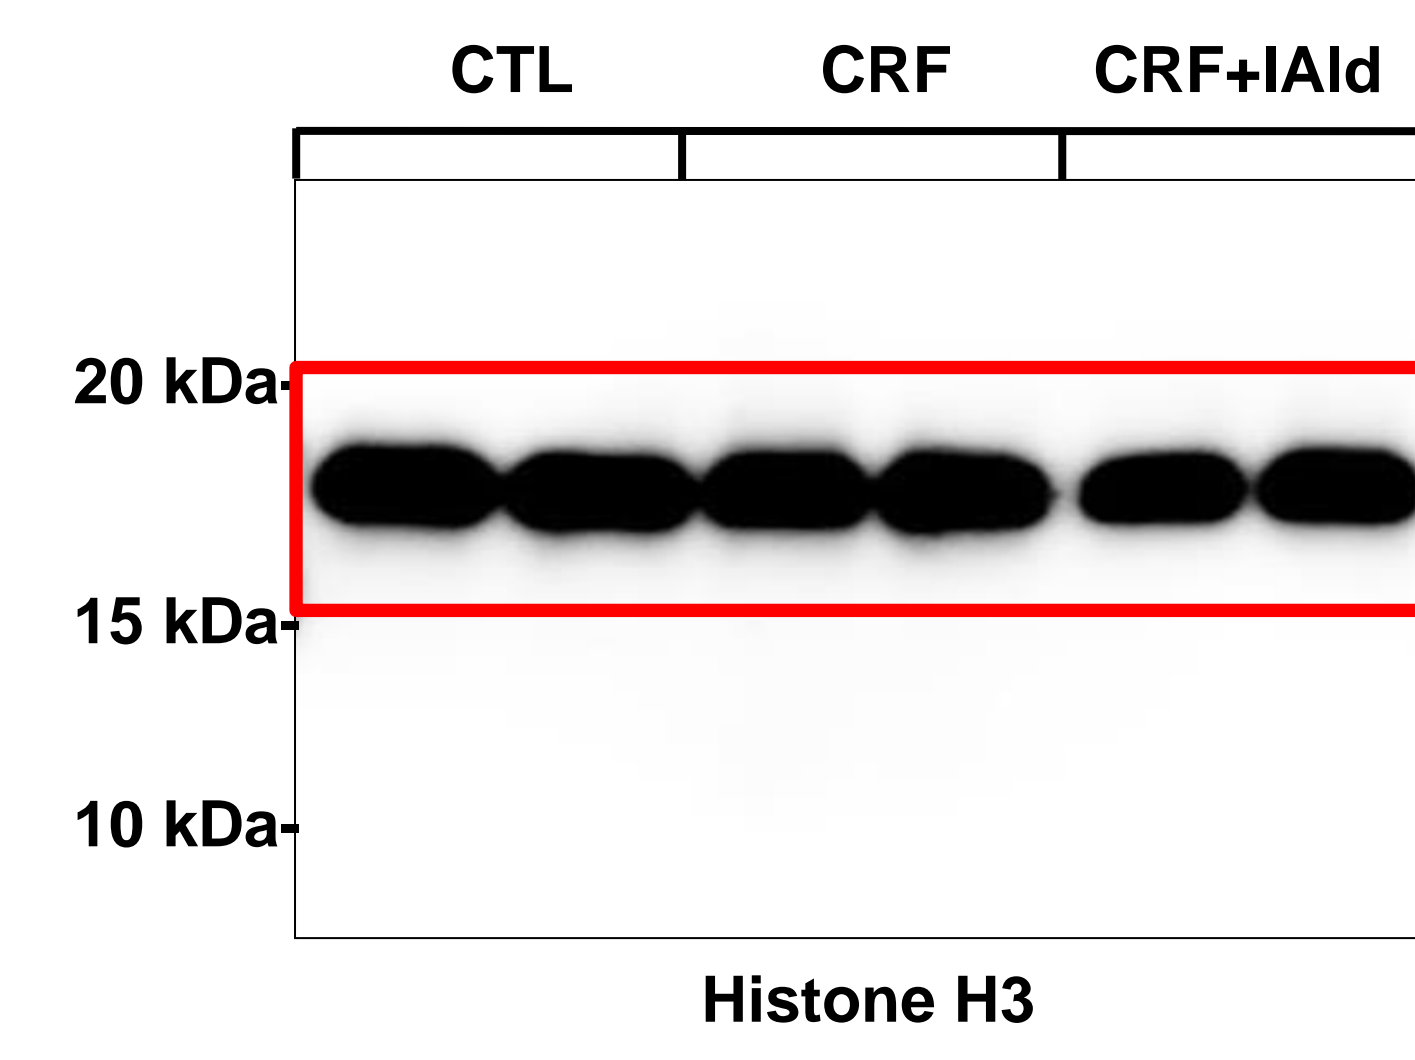

**Figure 8n**

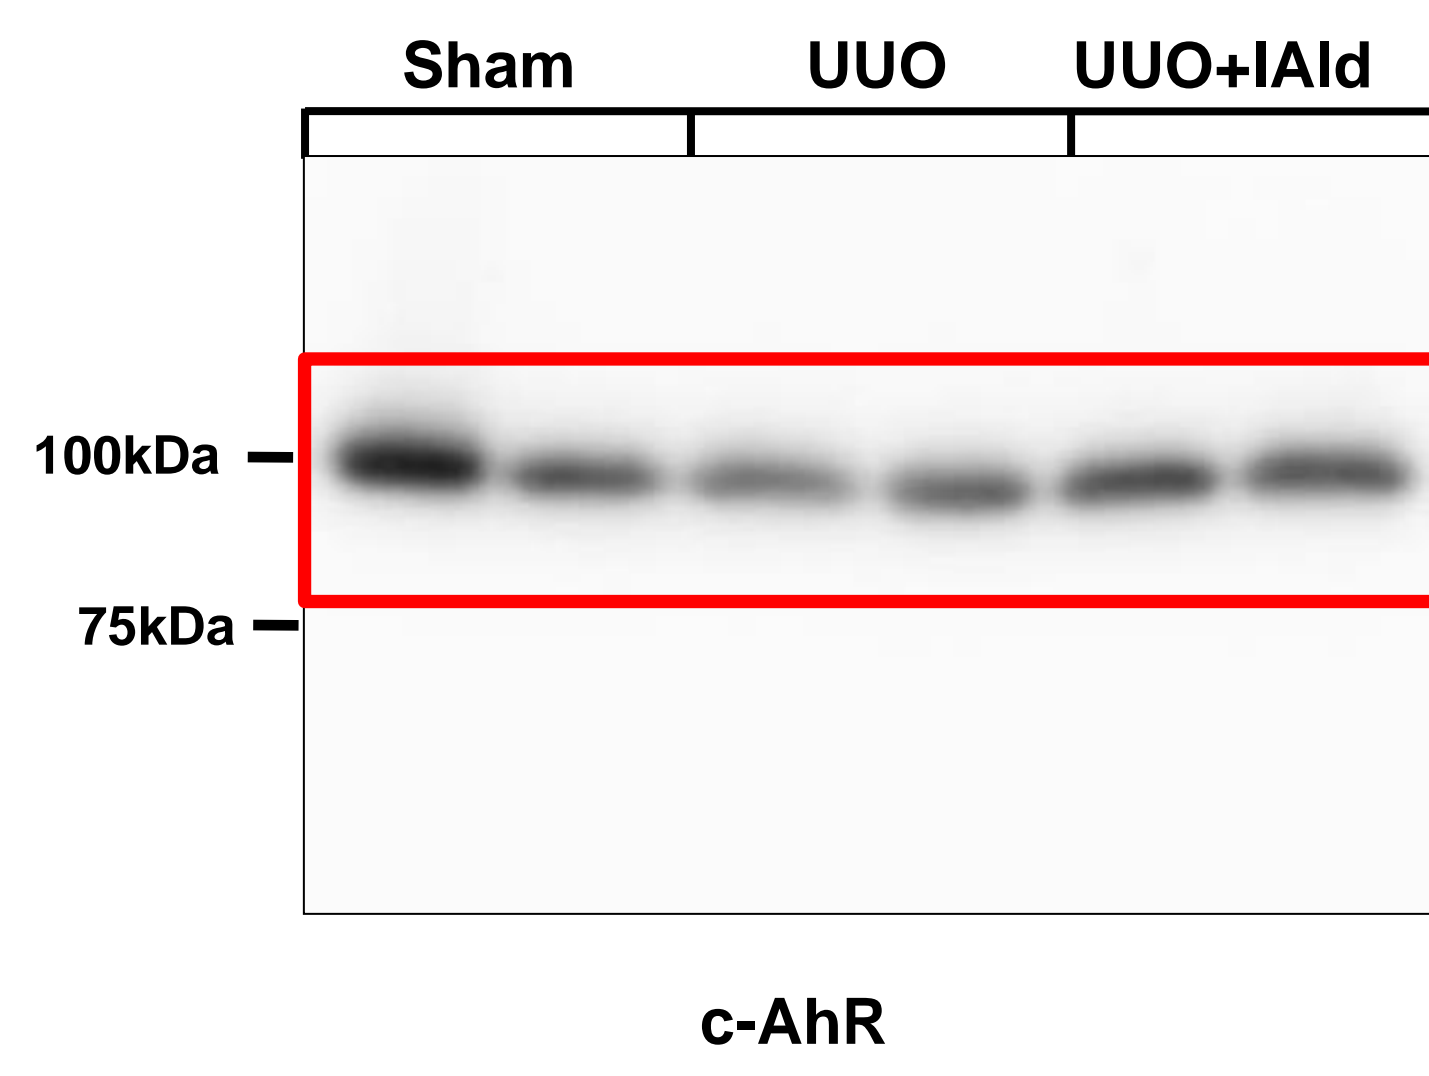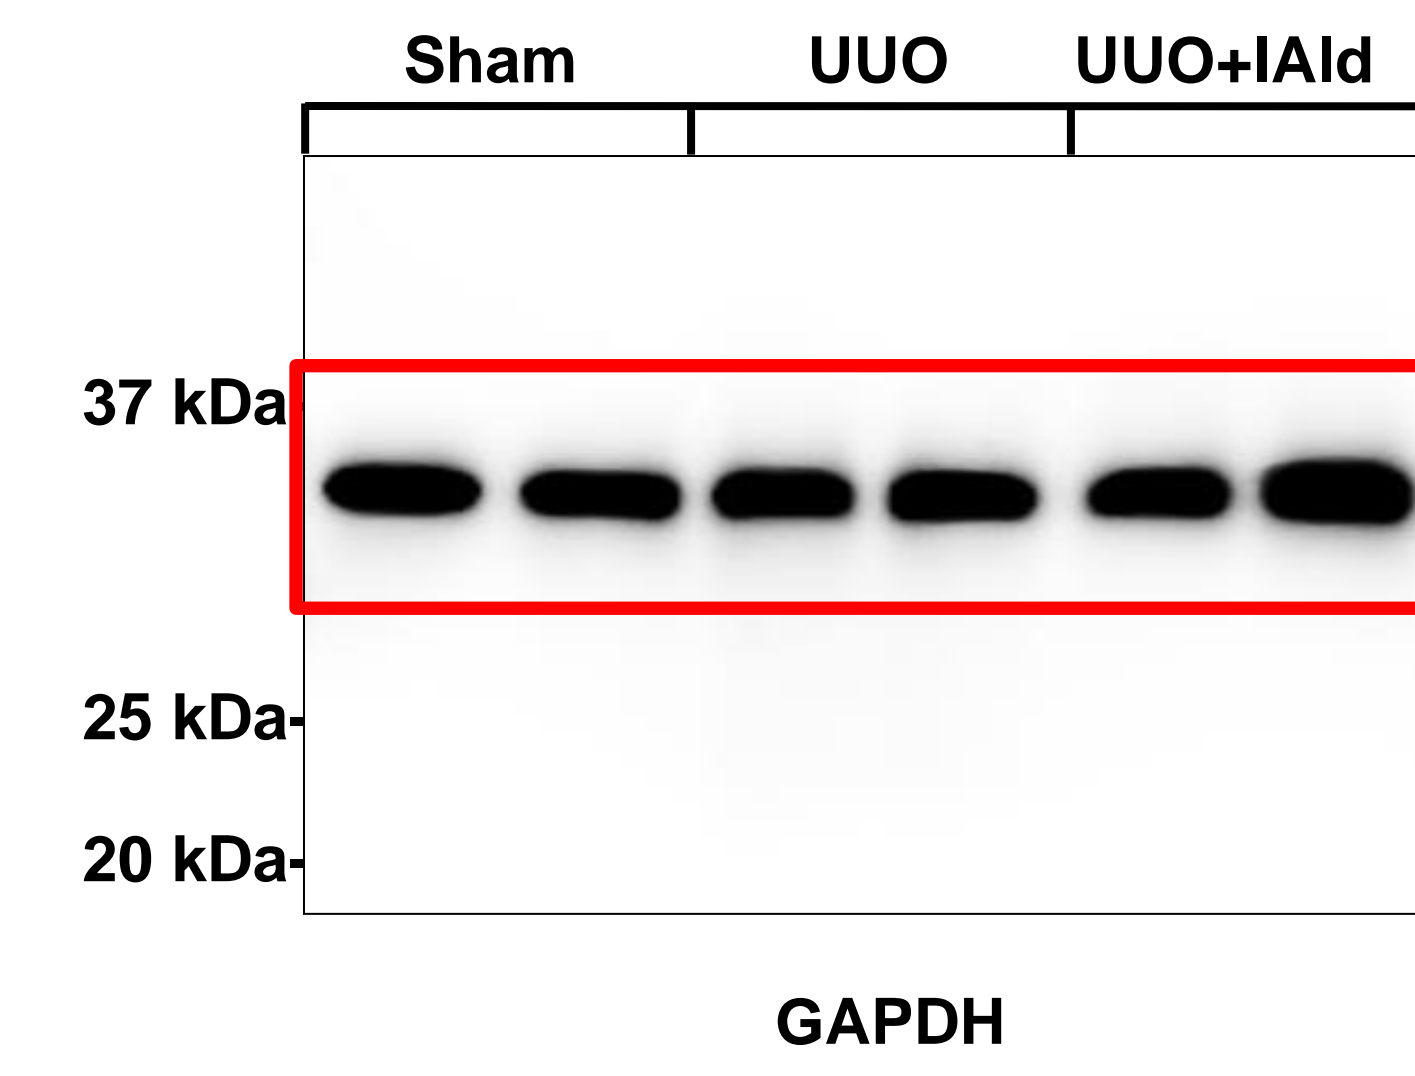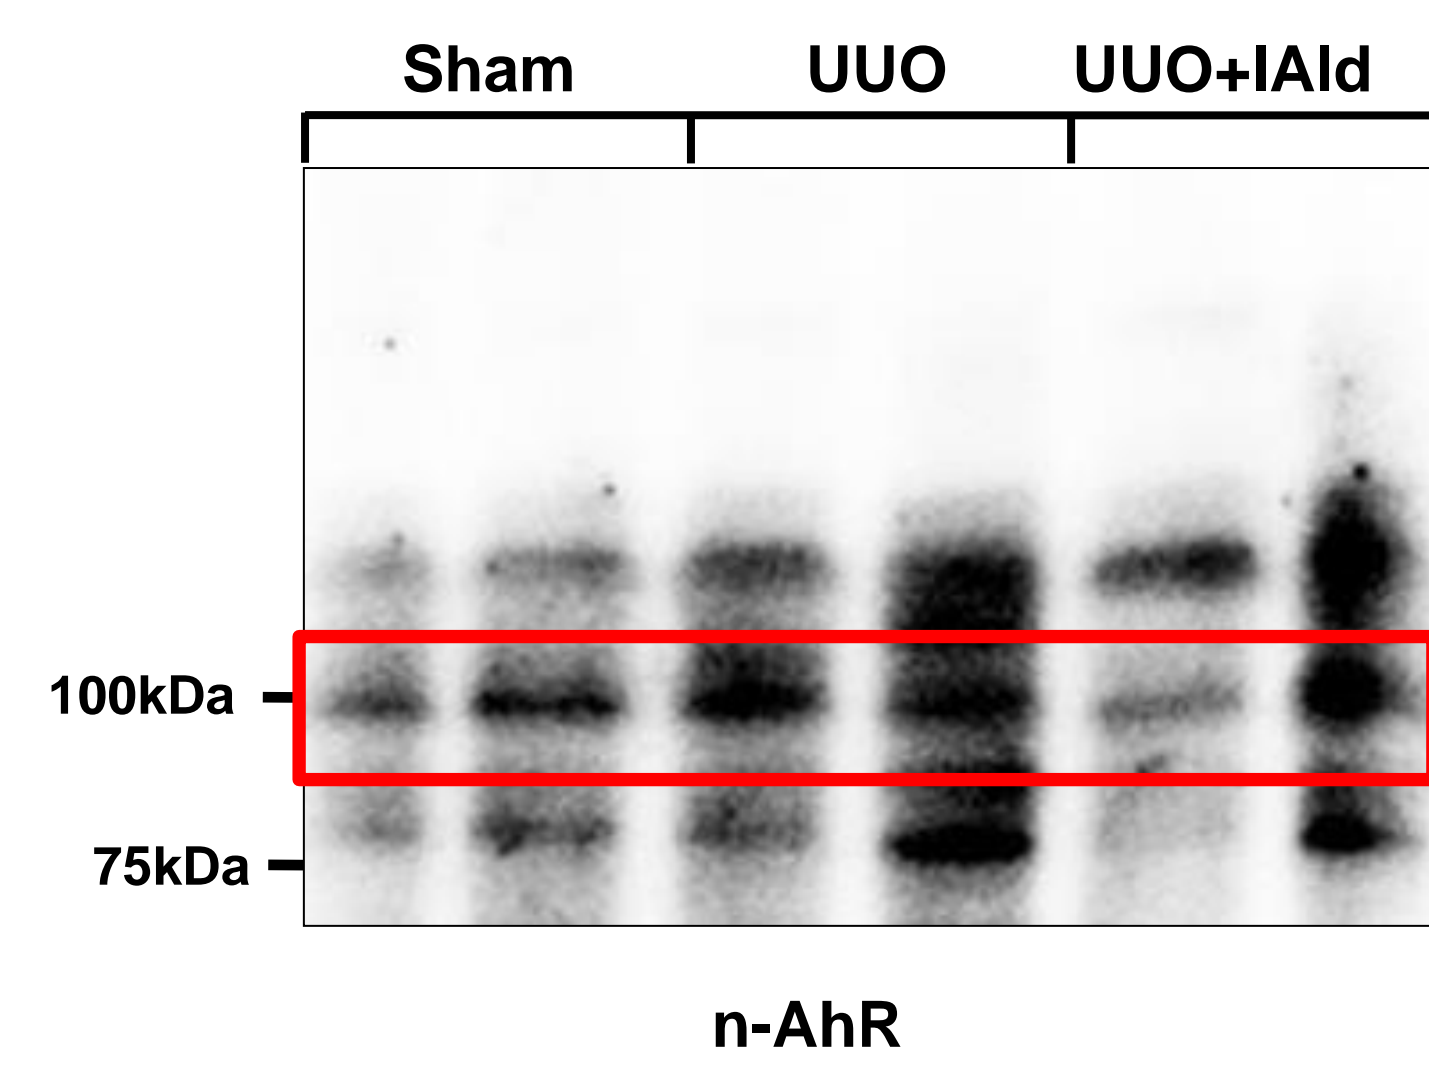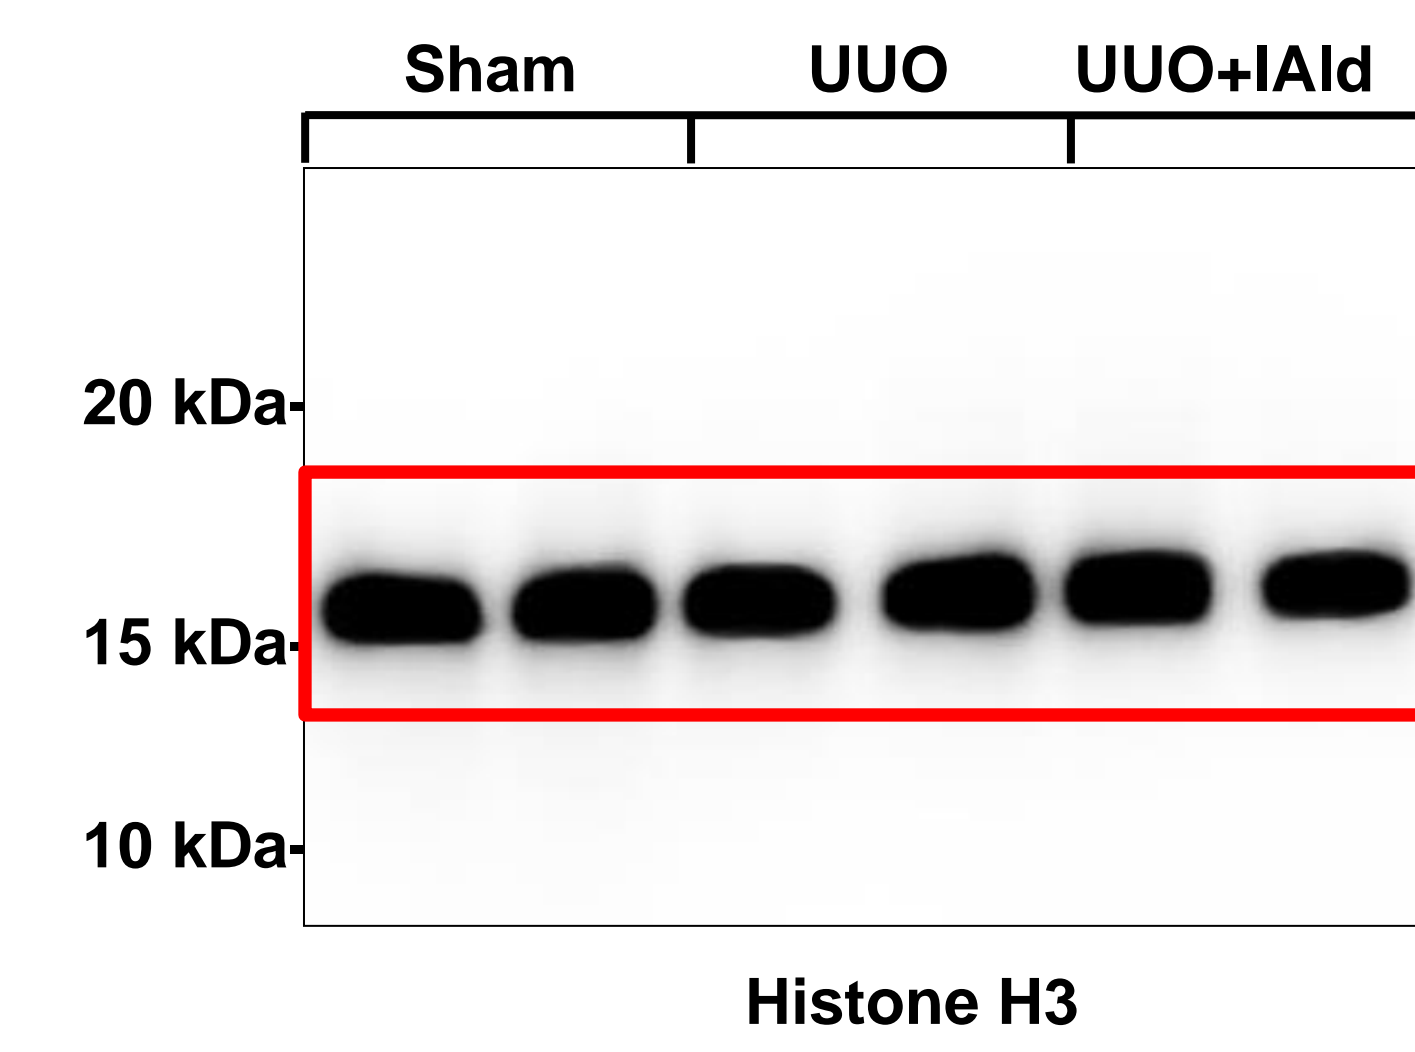

**Figure 9d**

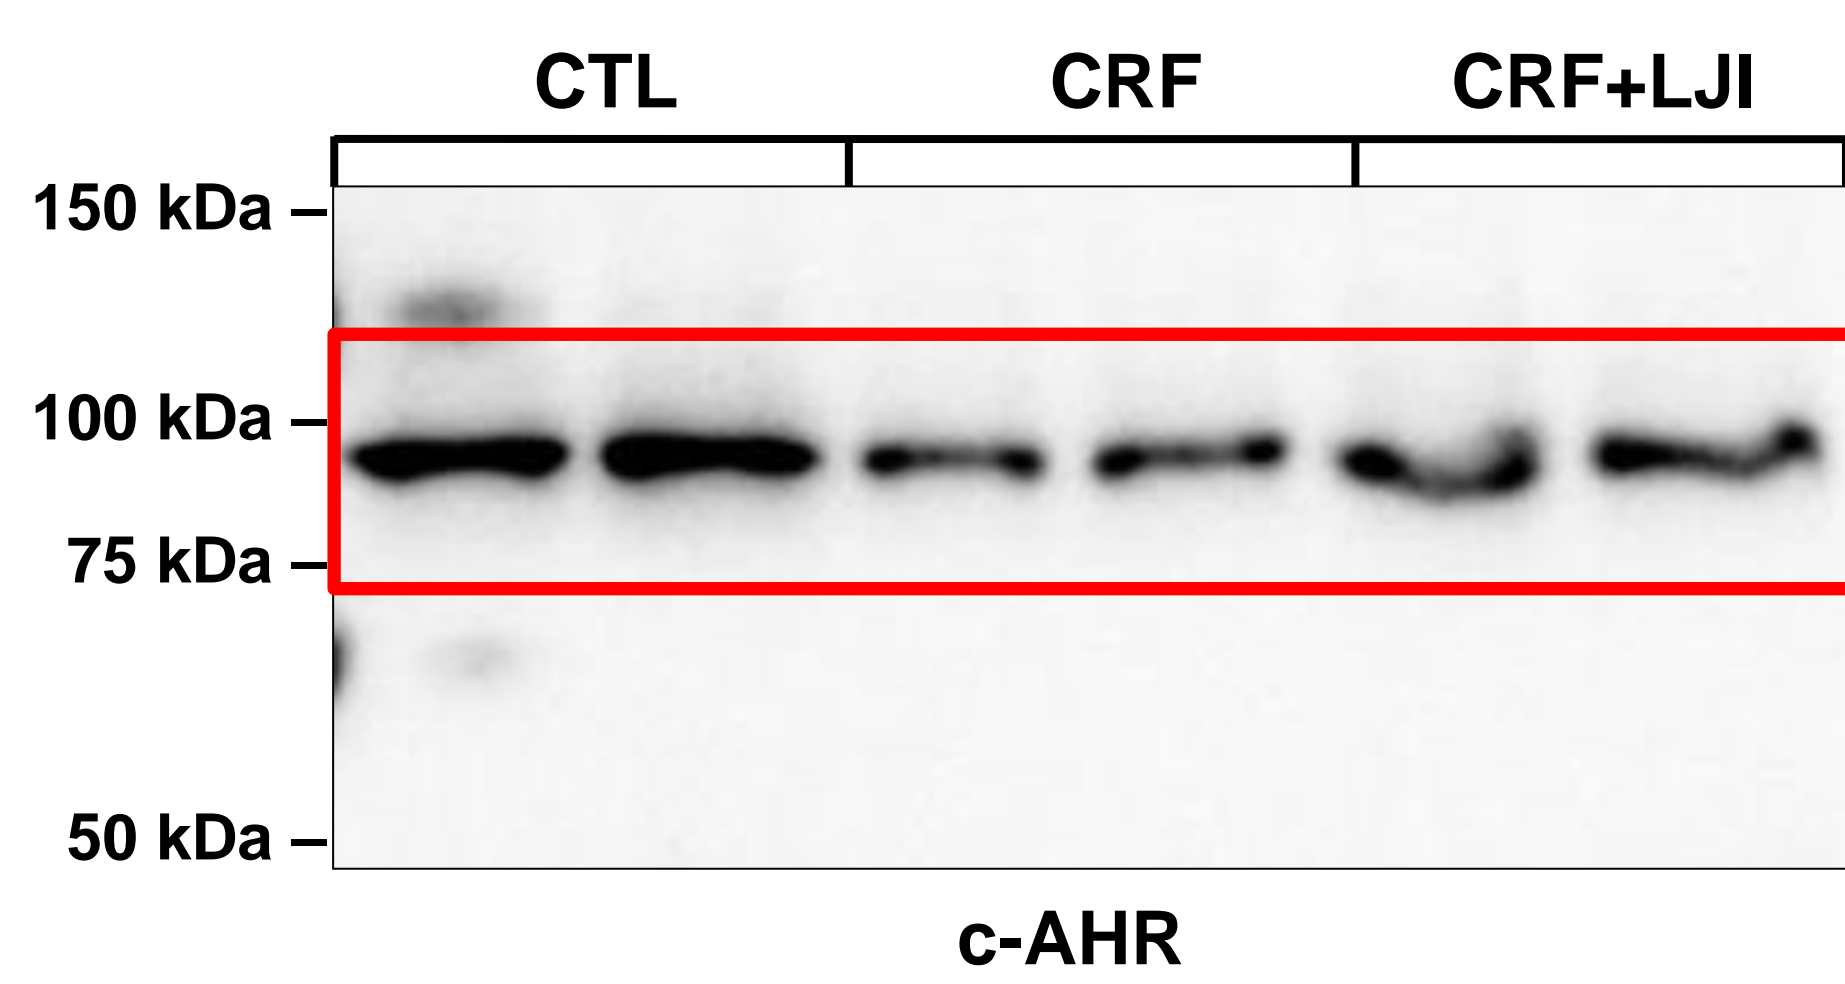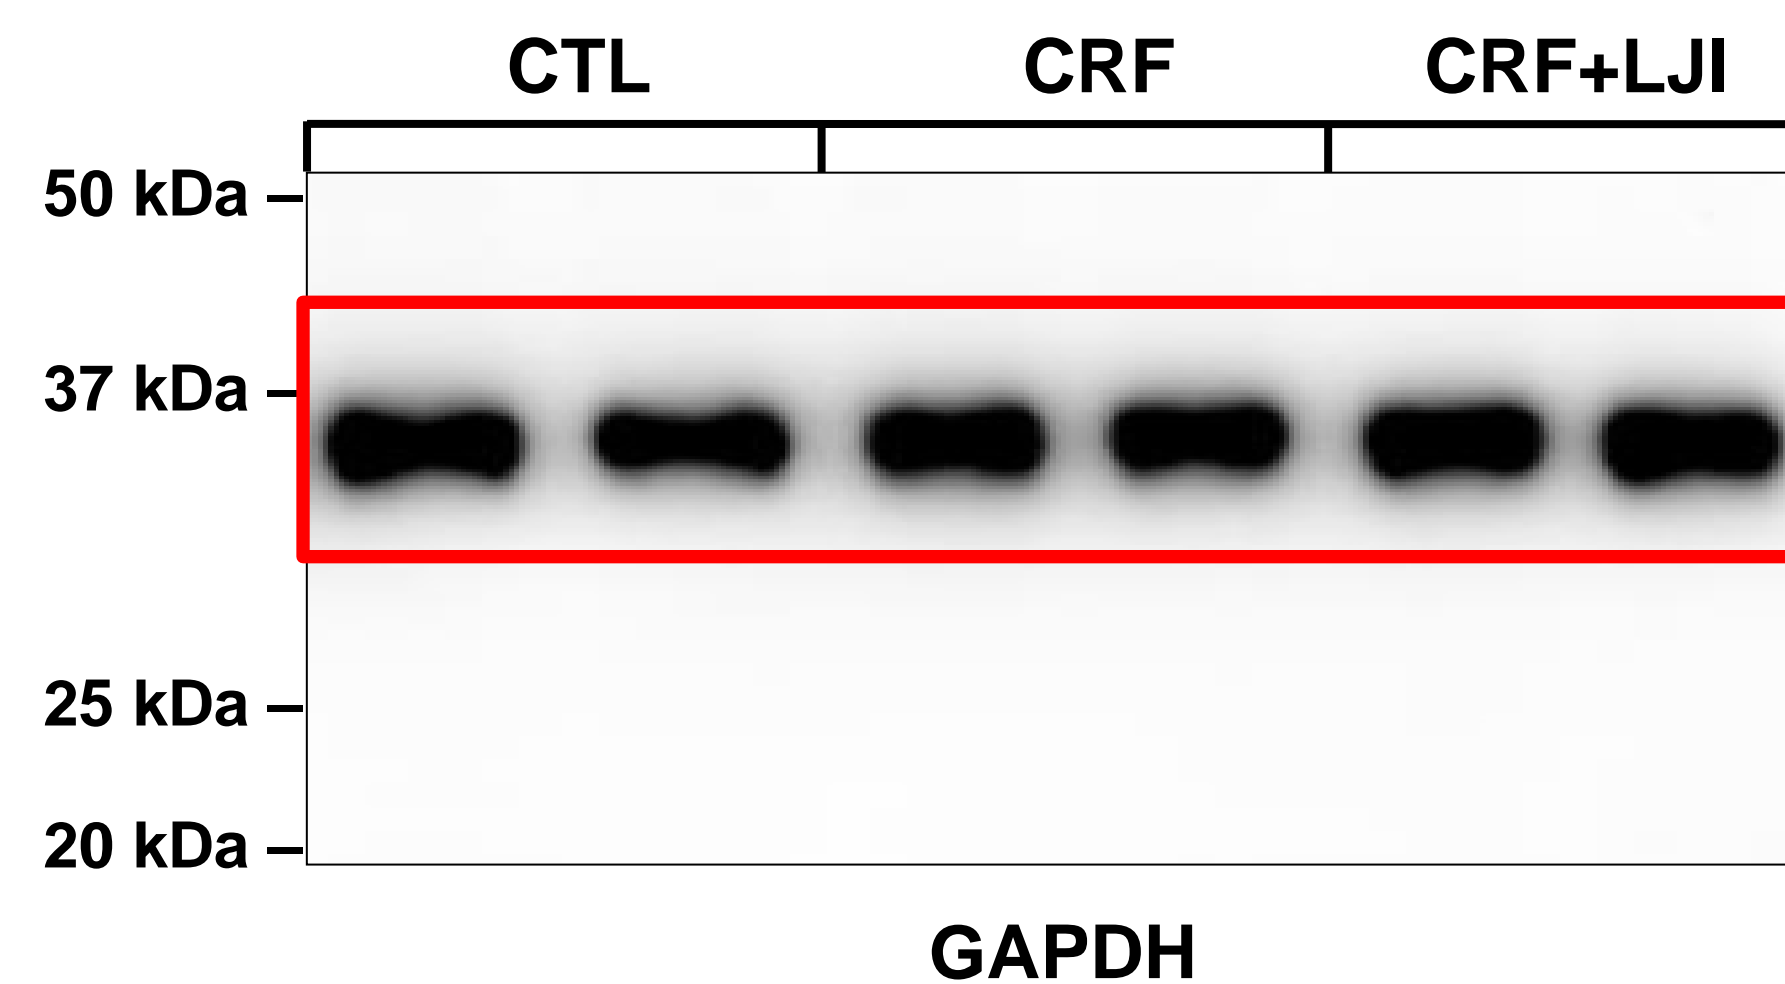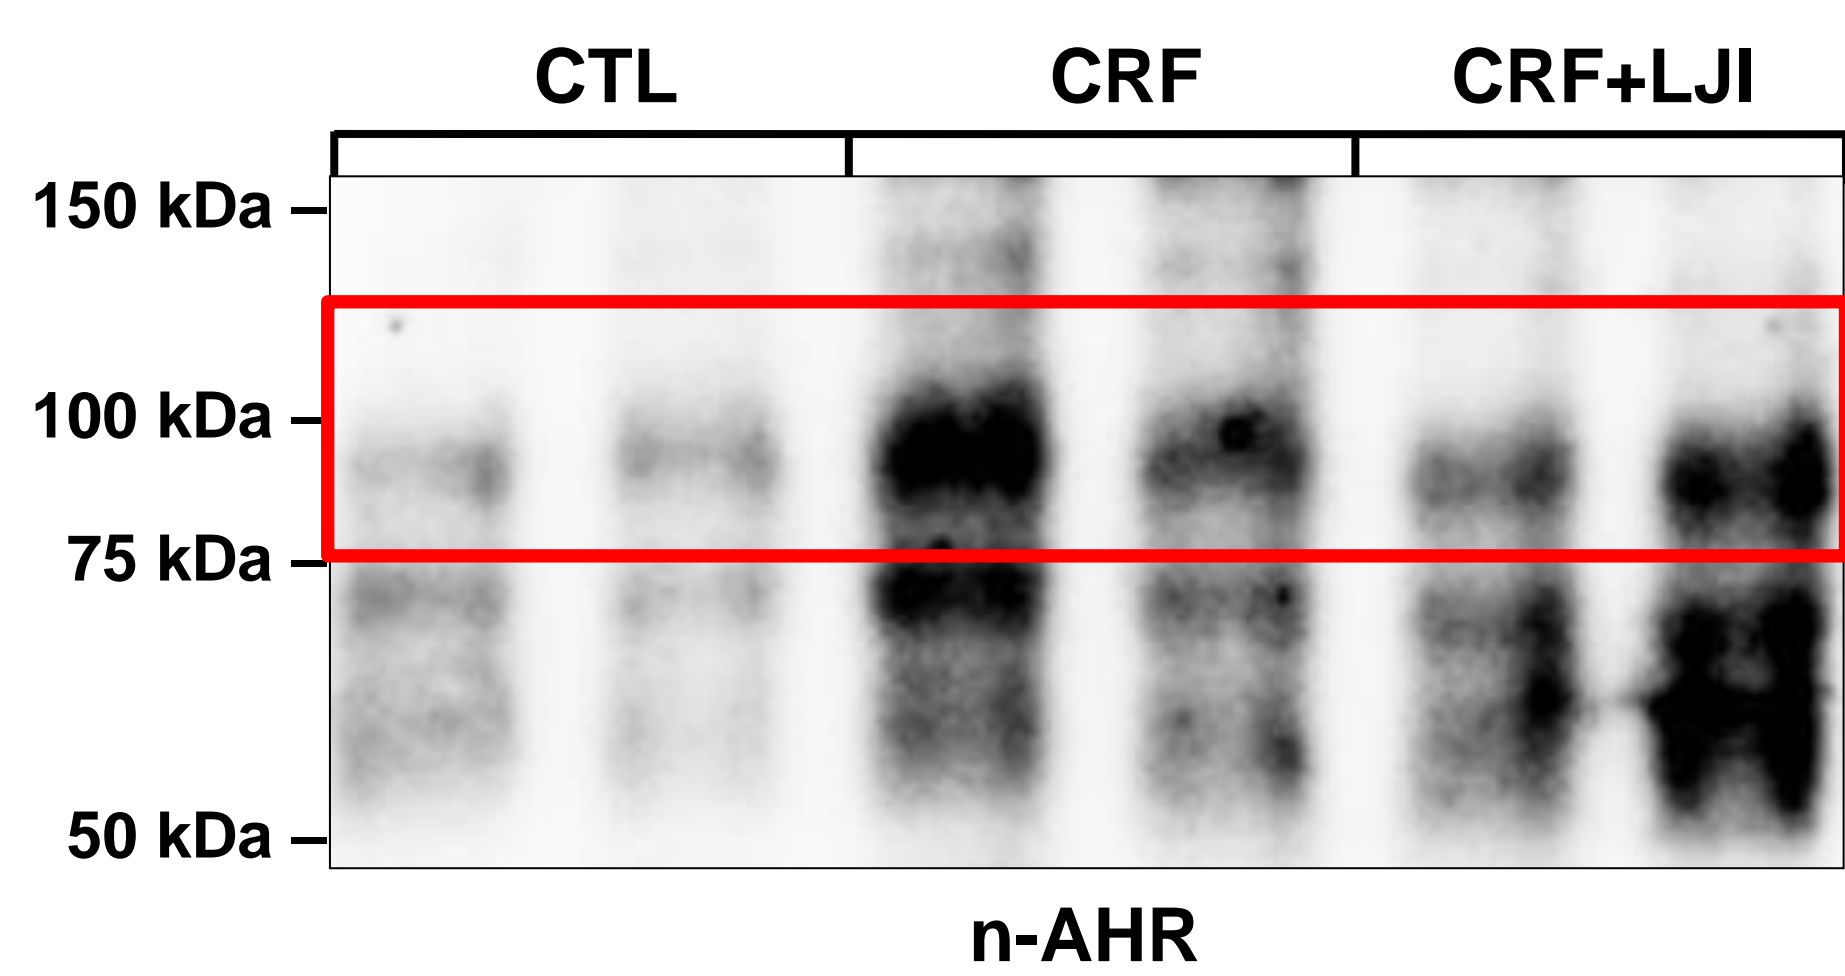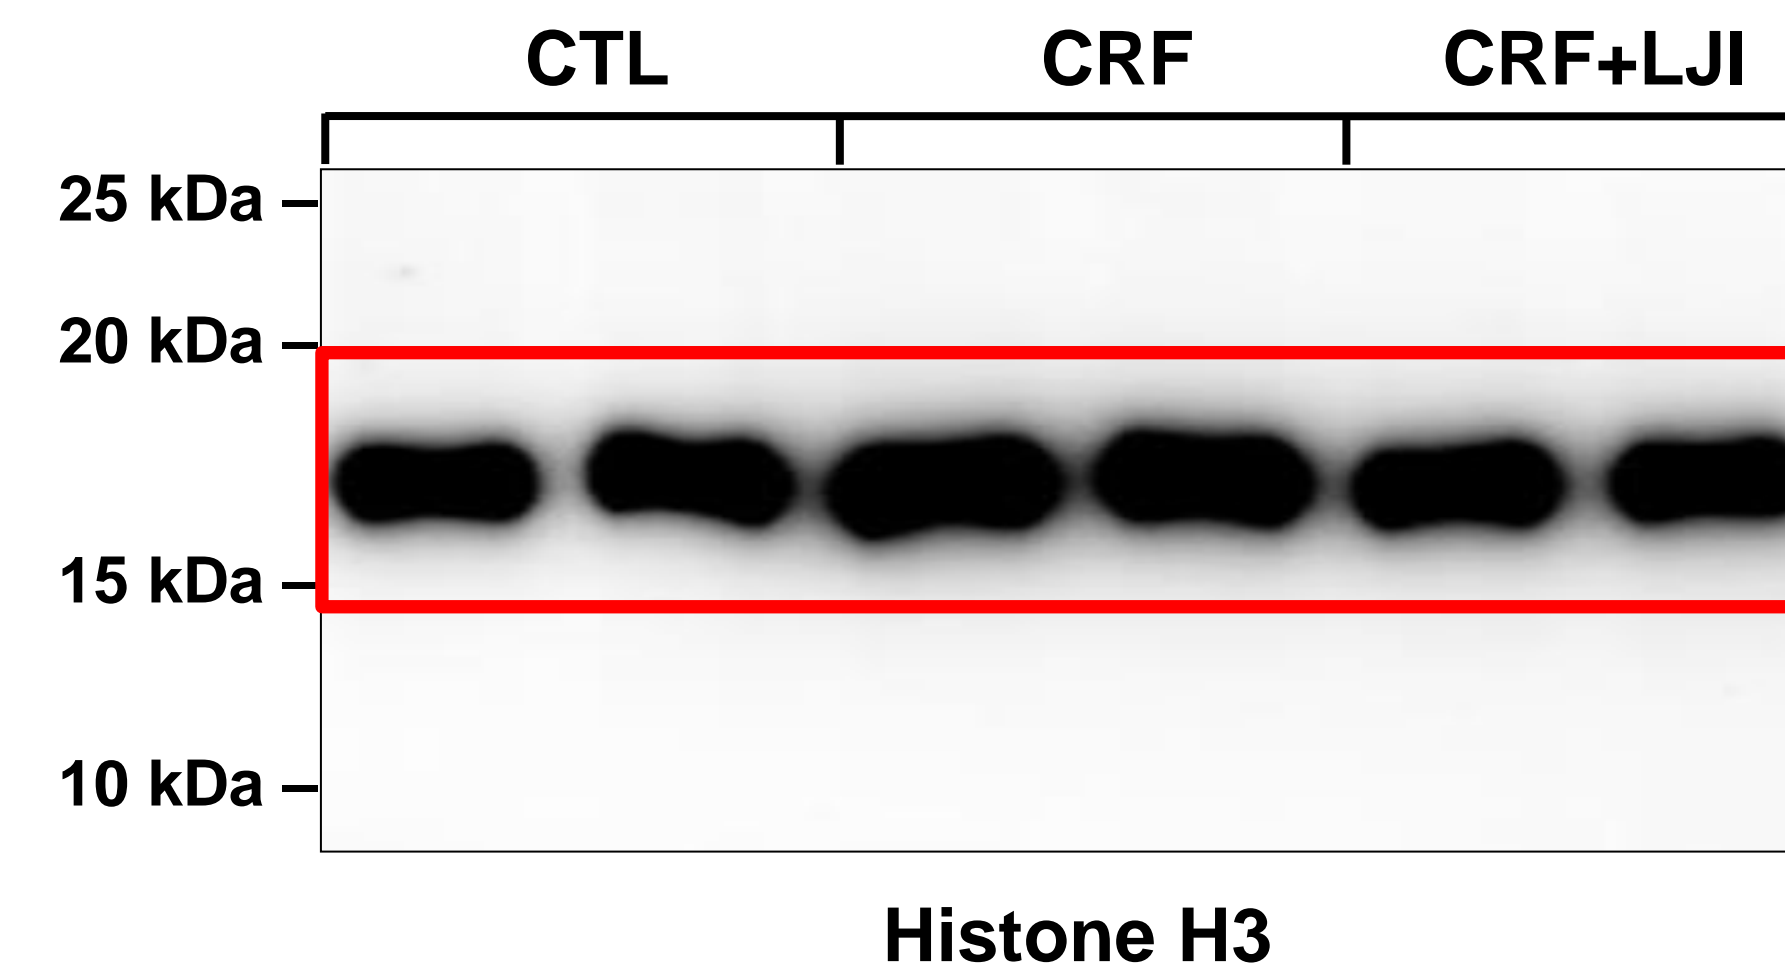

**Figure 9h**

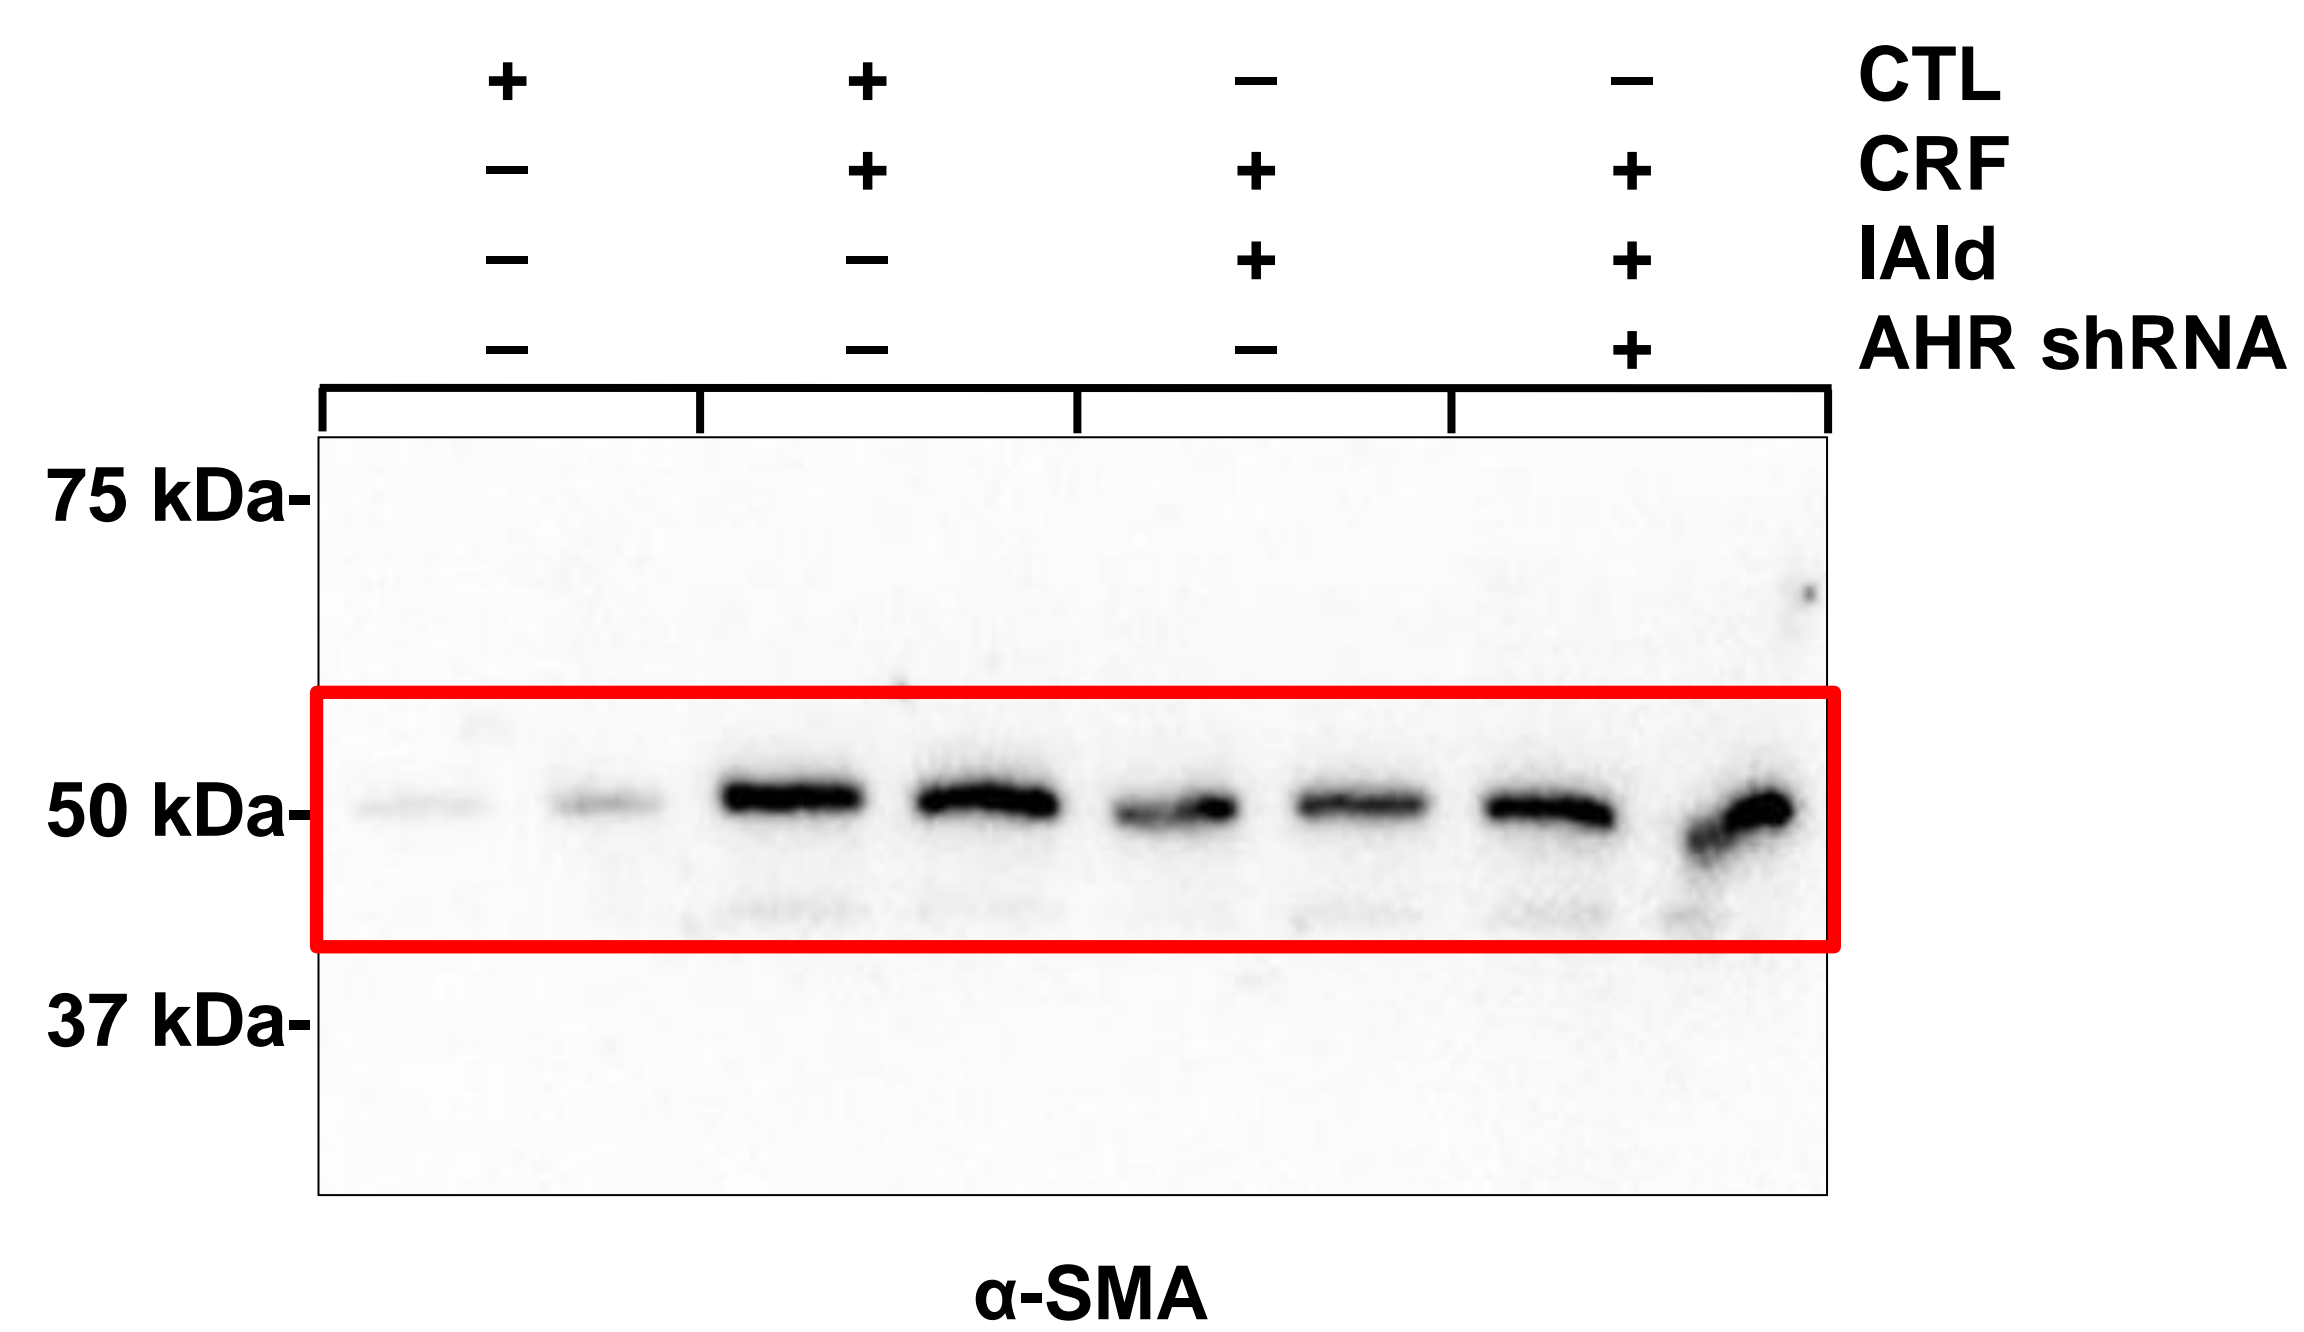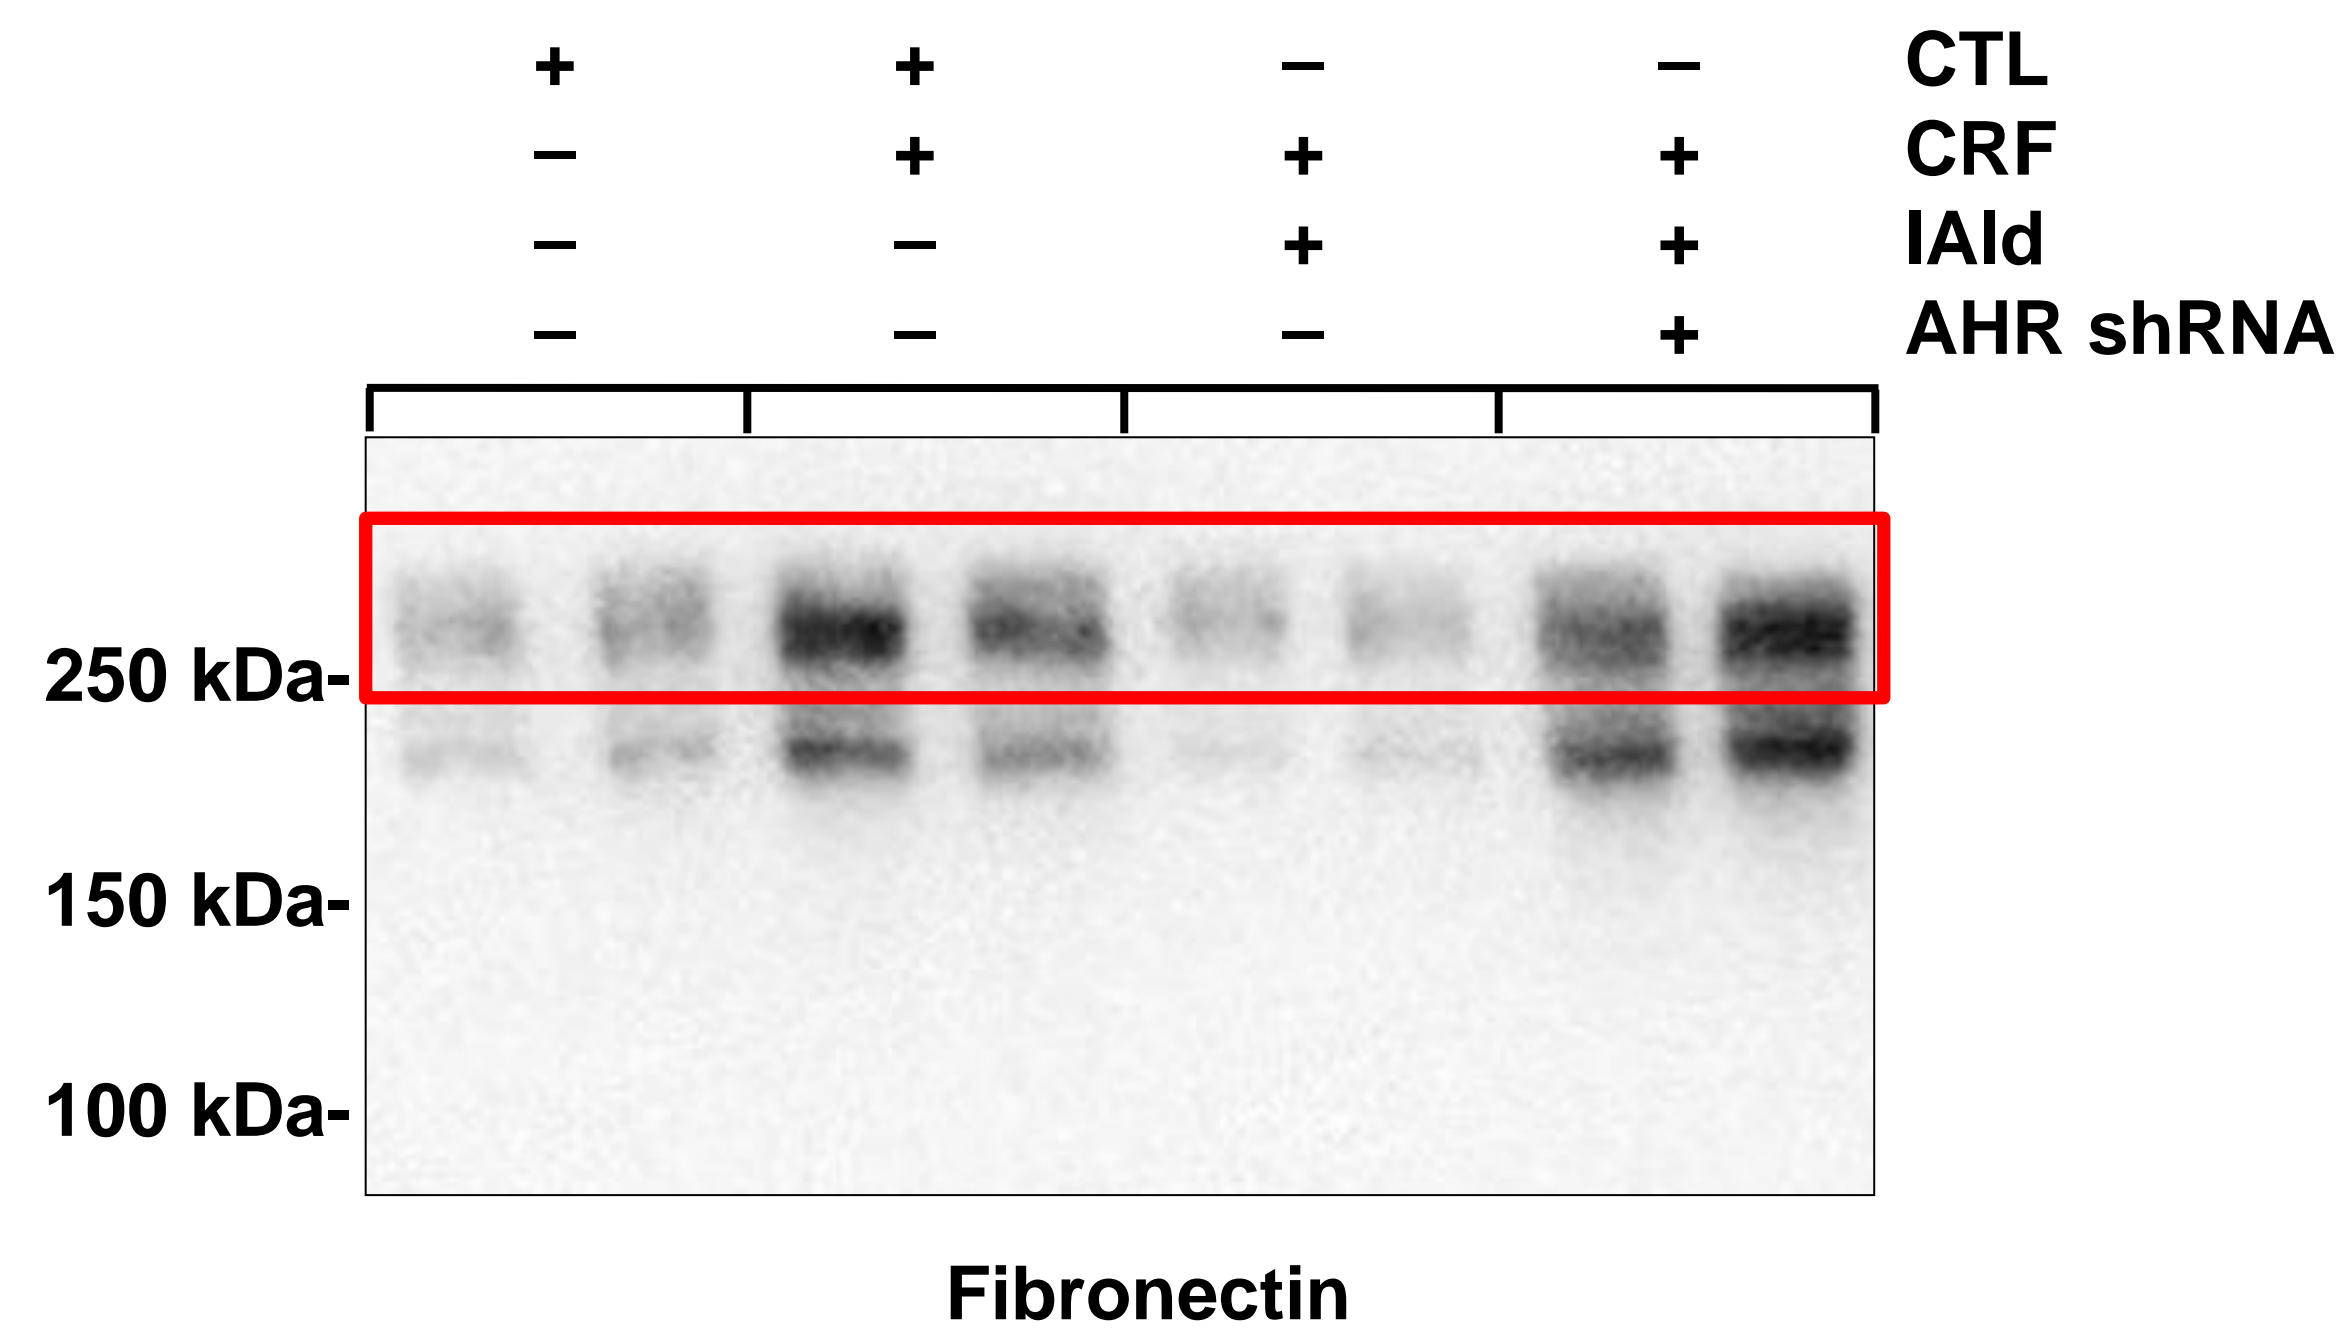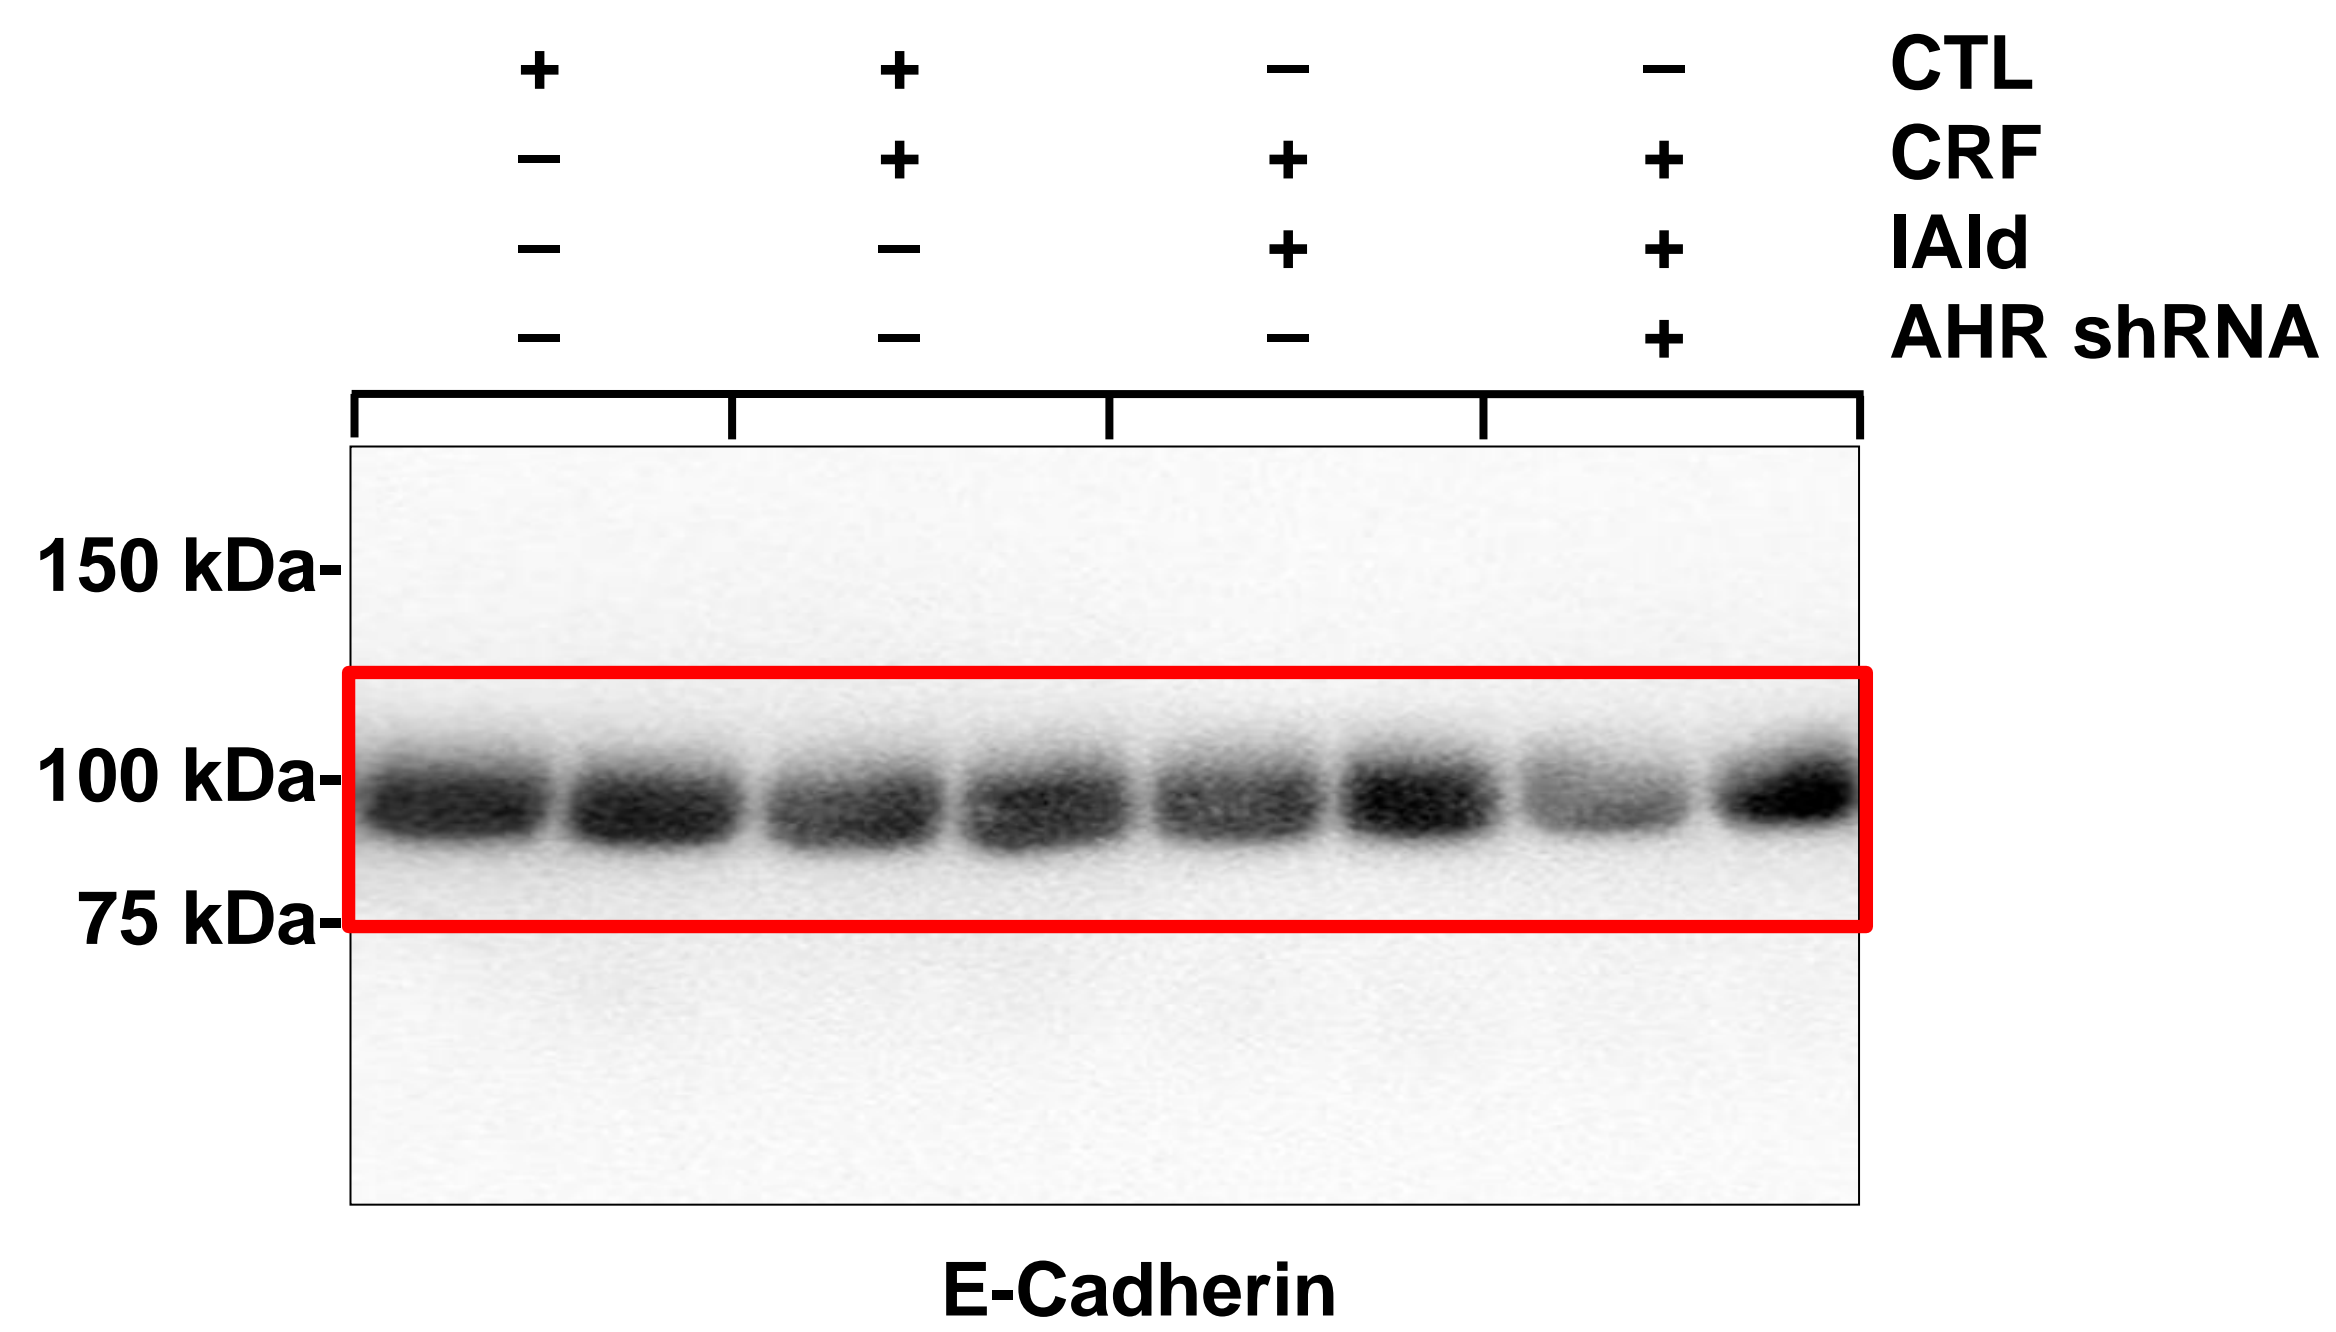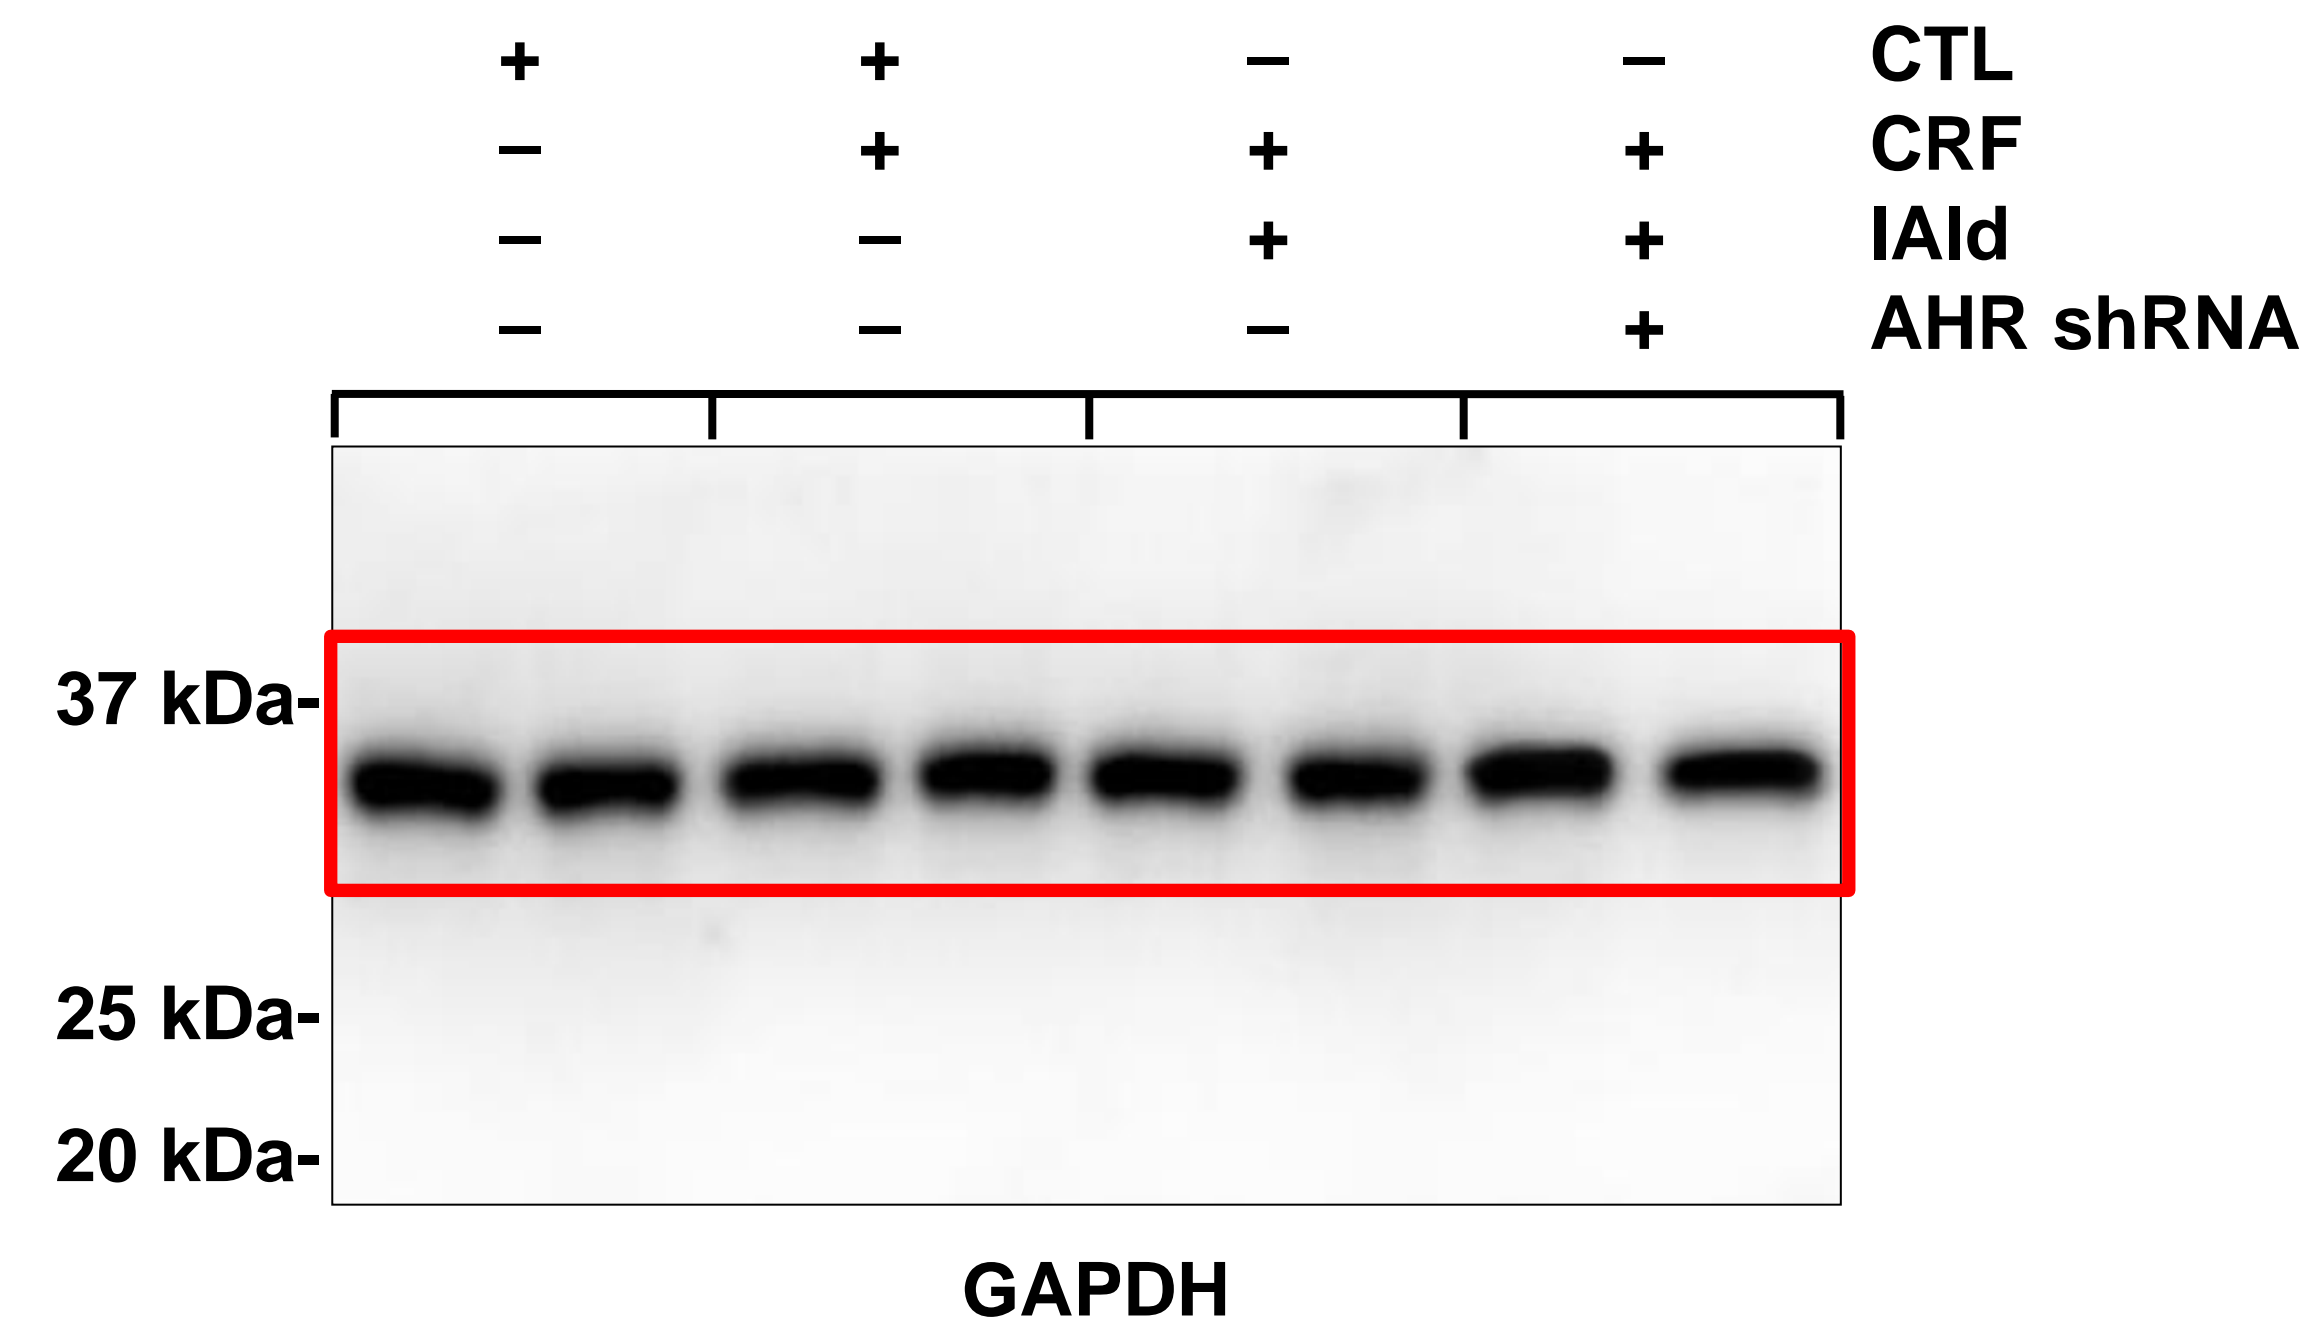

**Figure 9k**

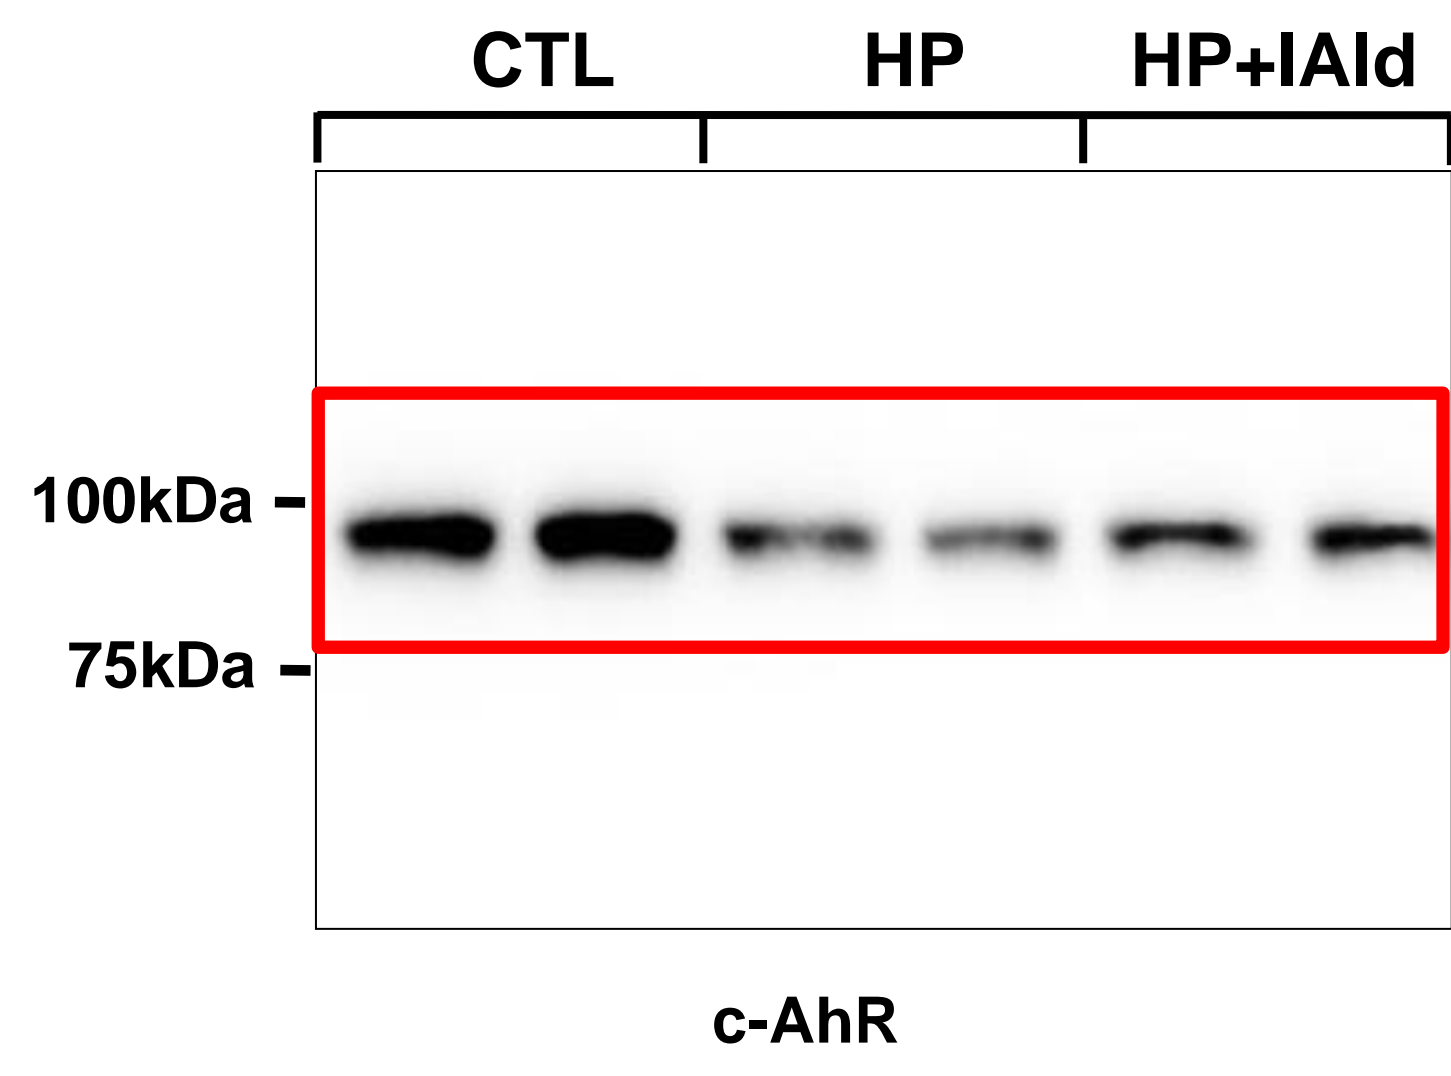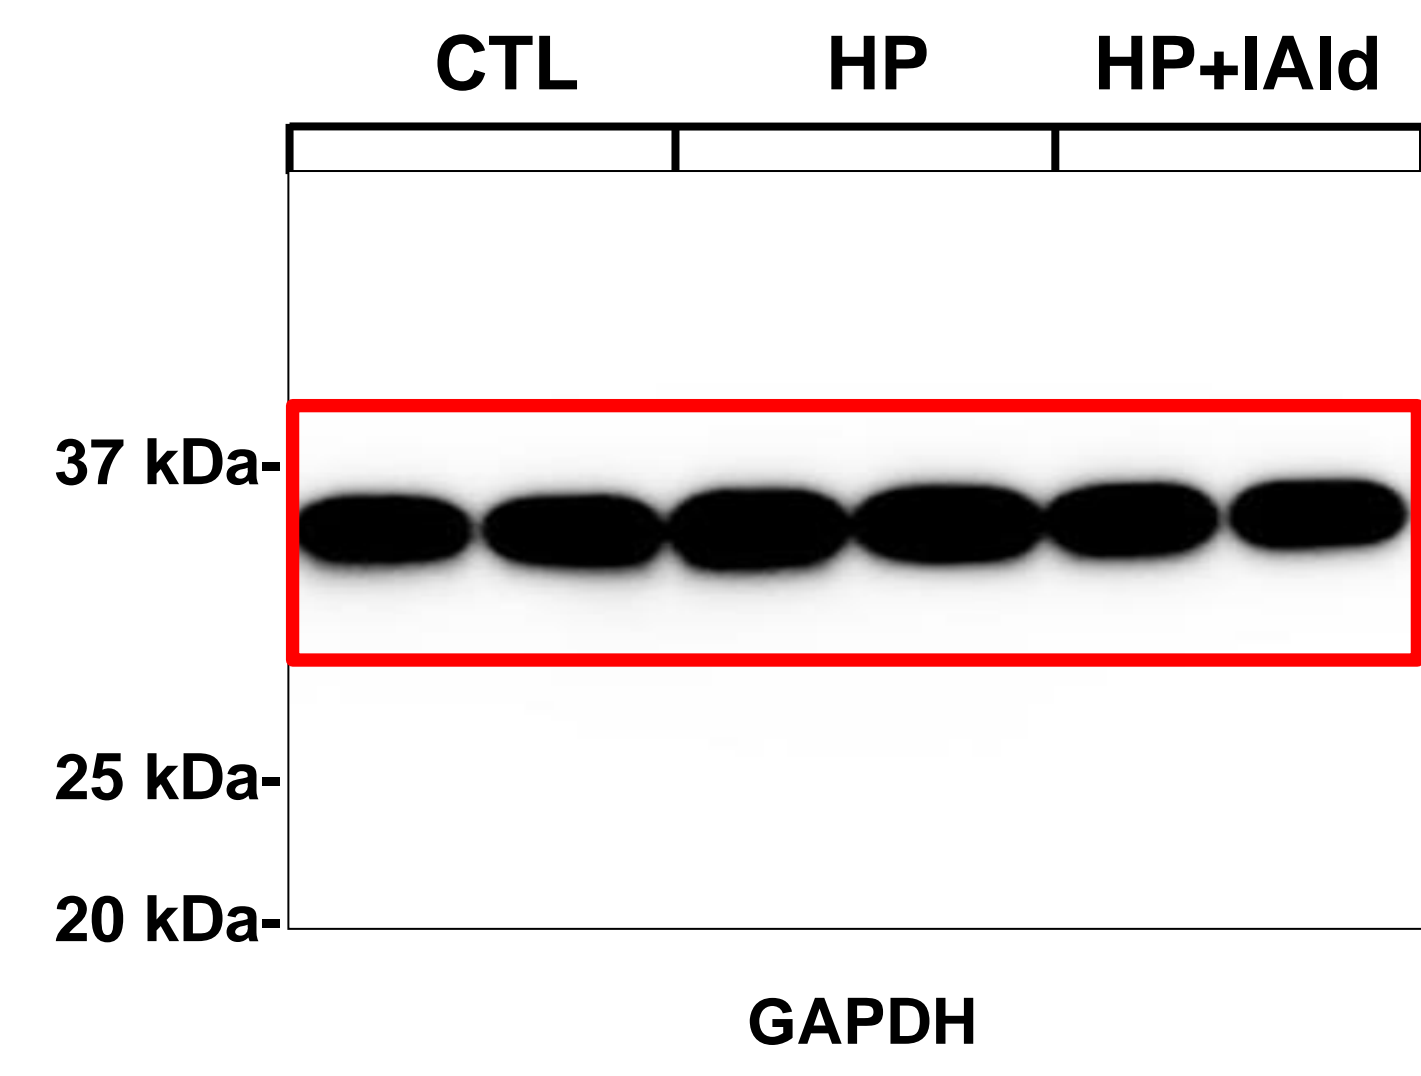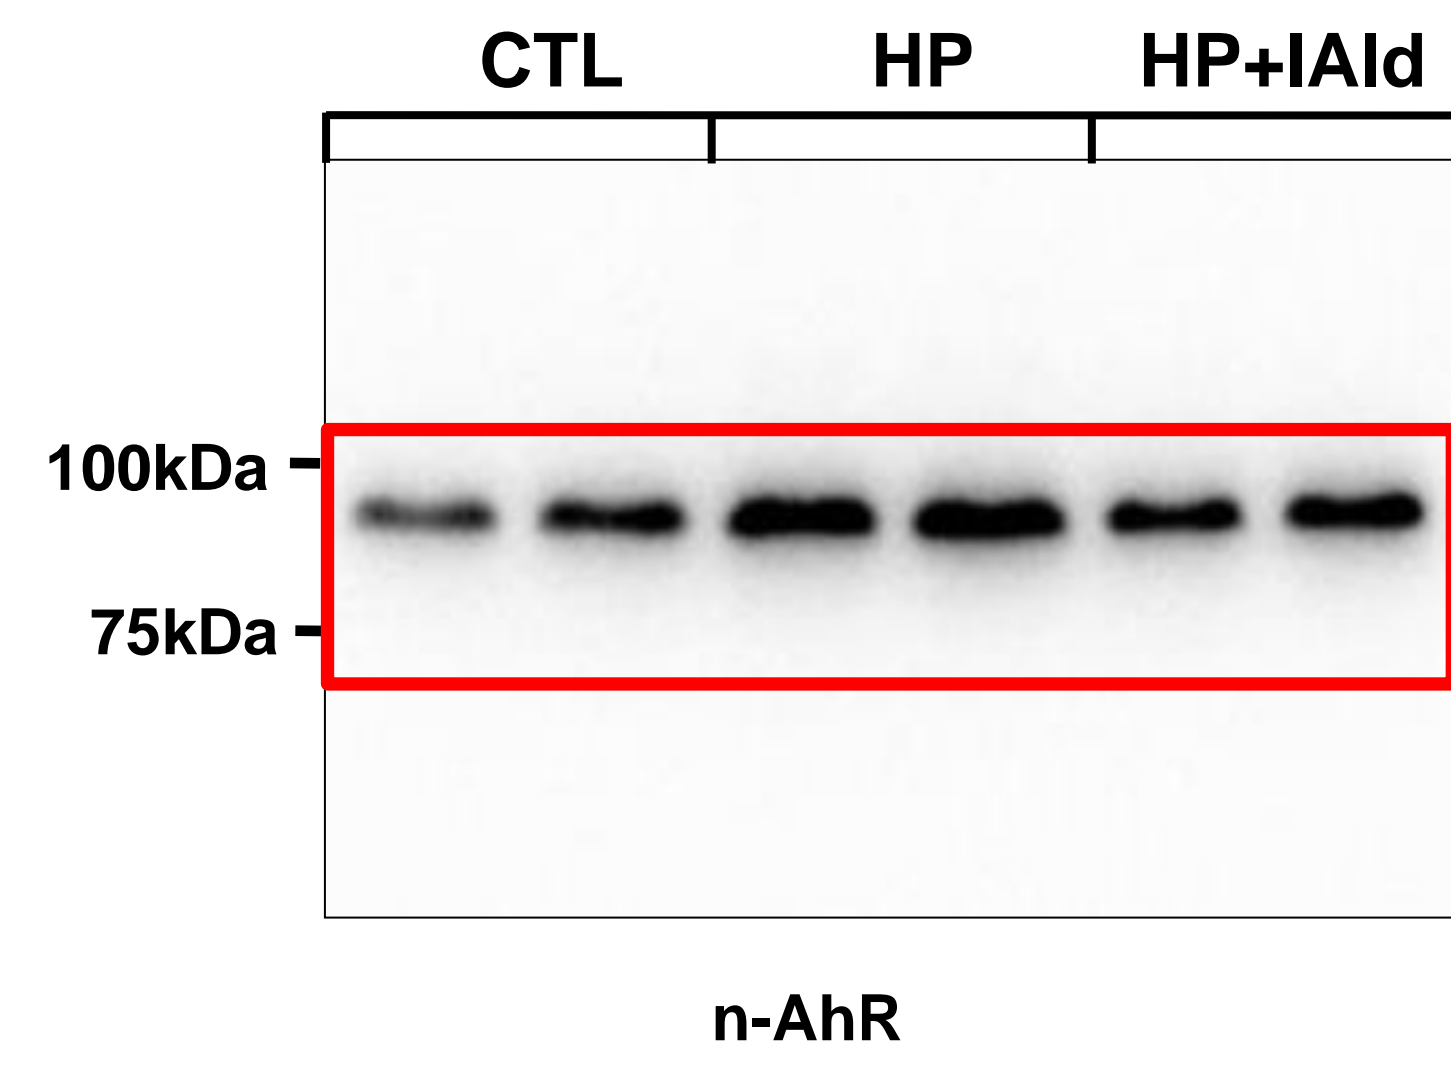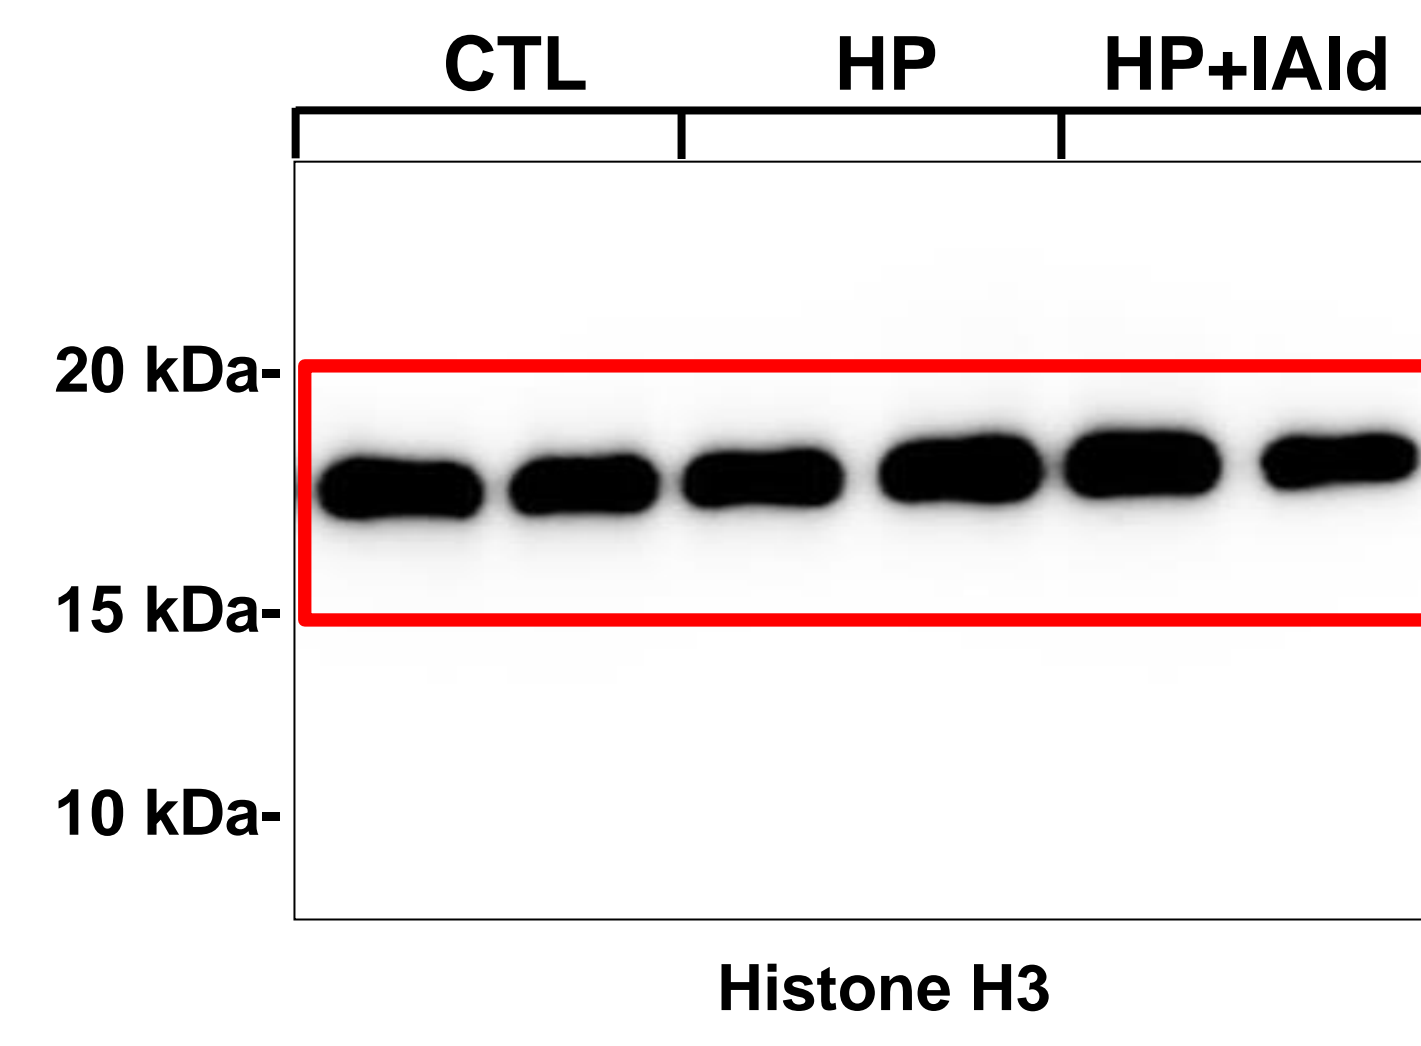

**Figure 9n**

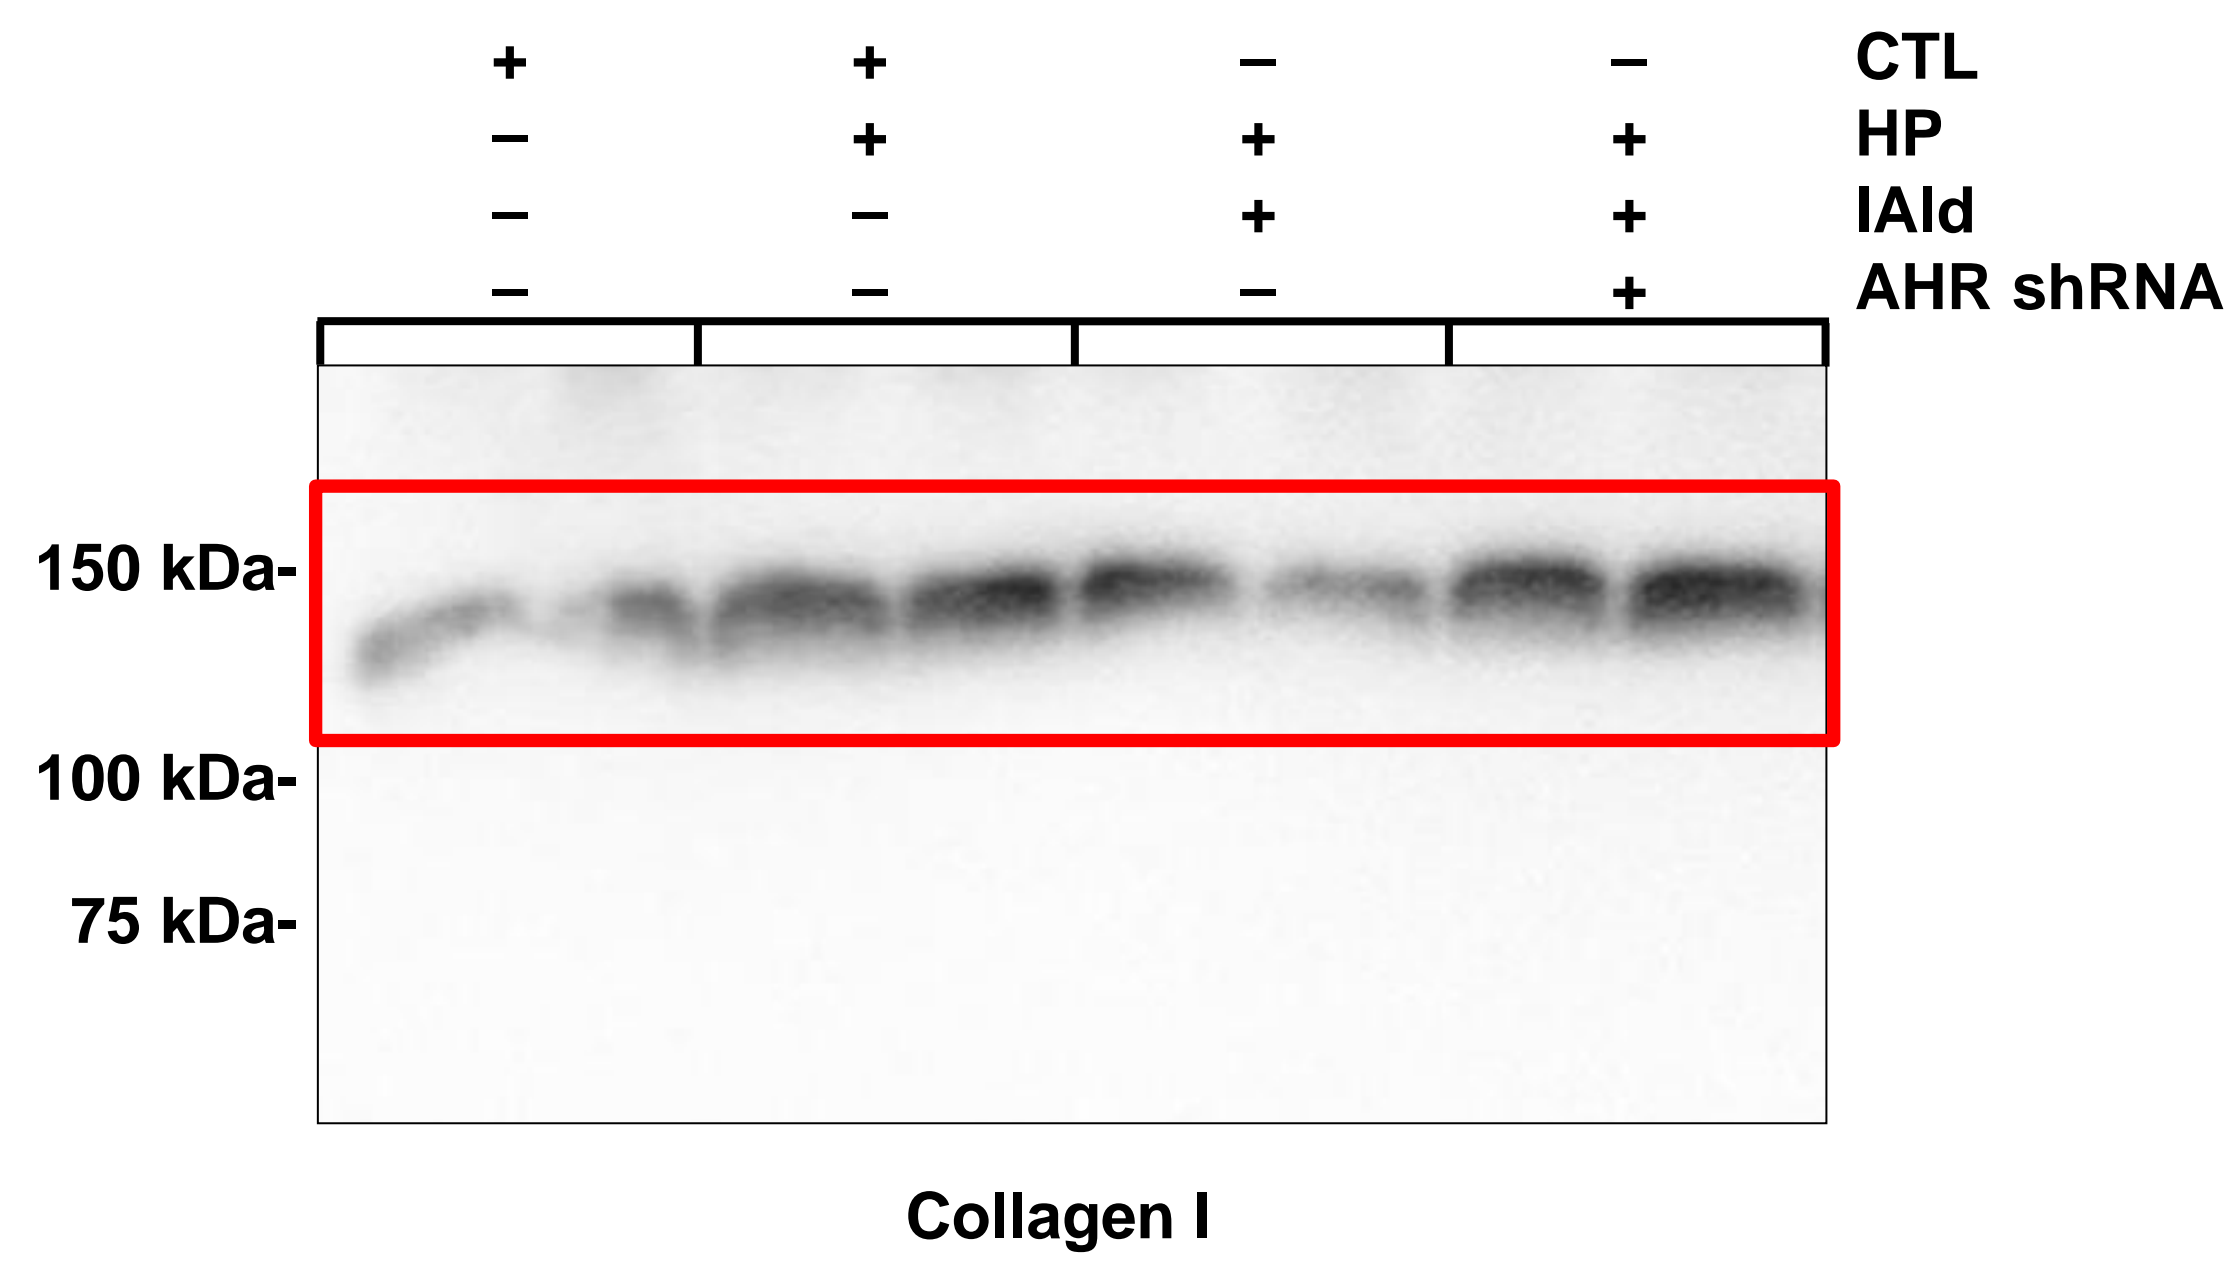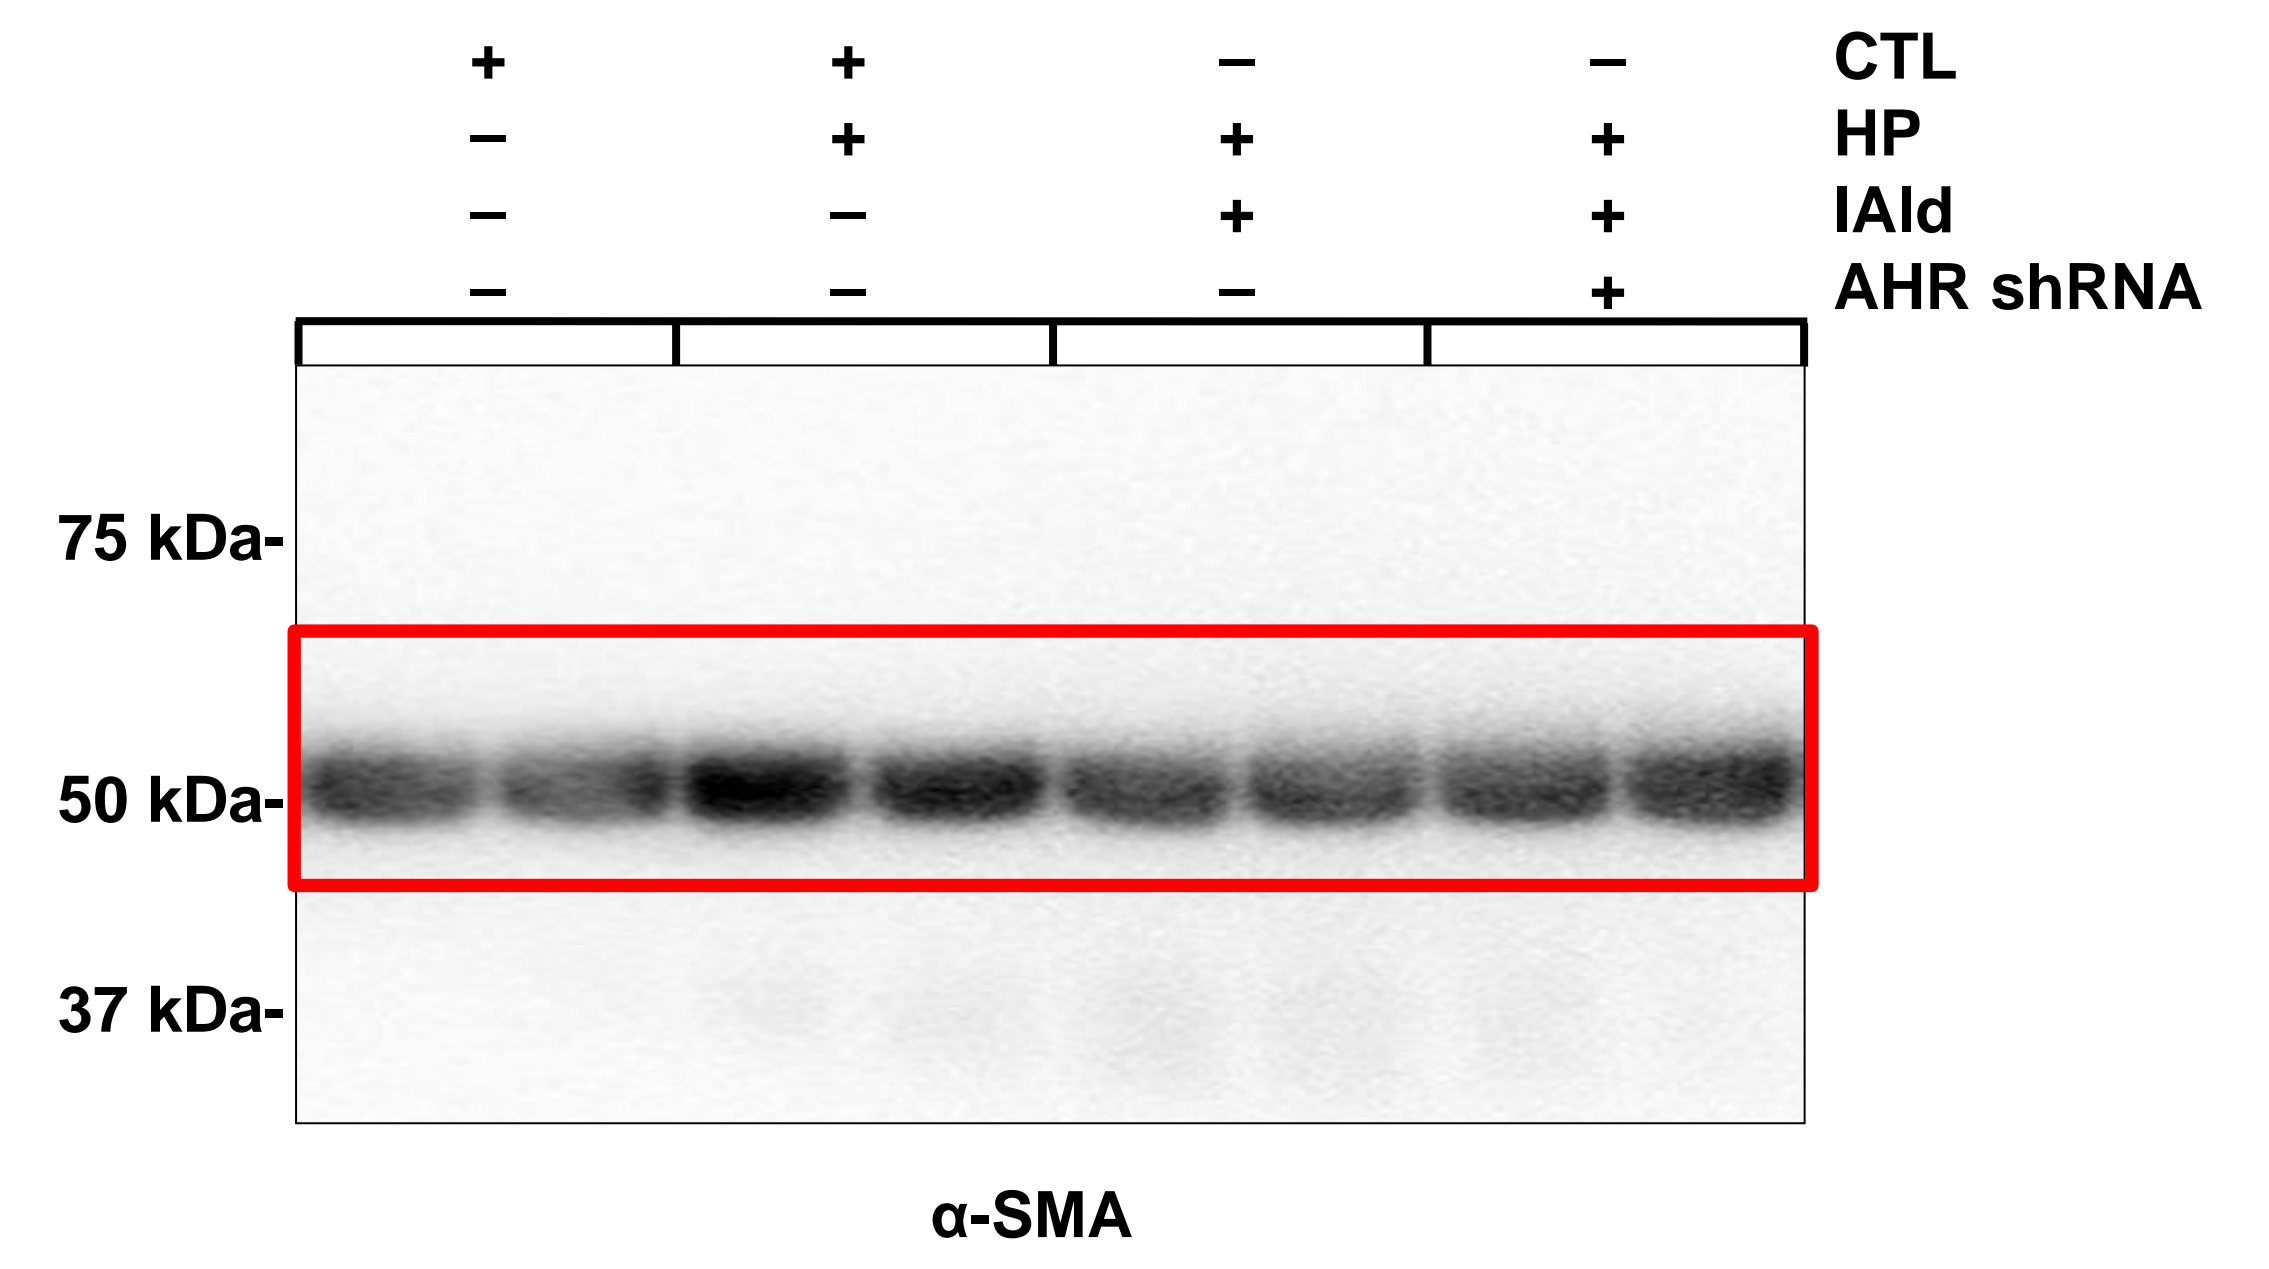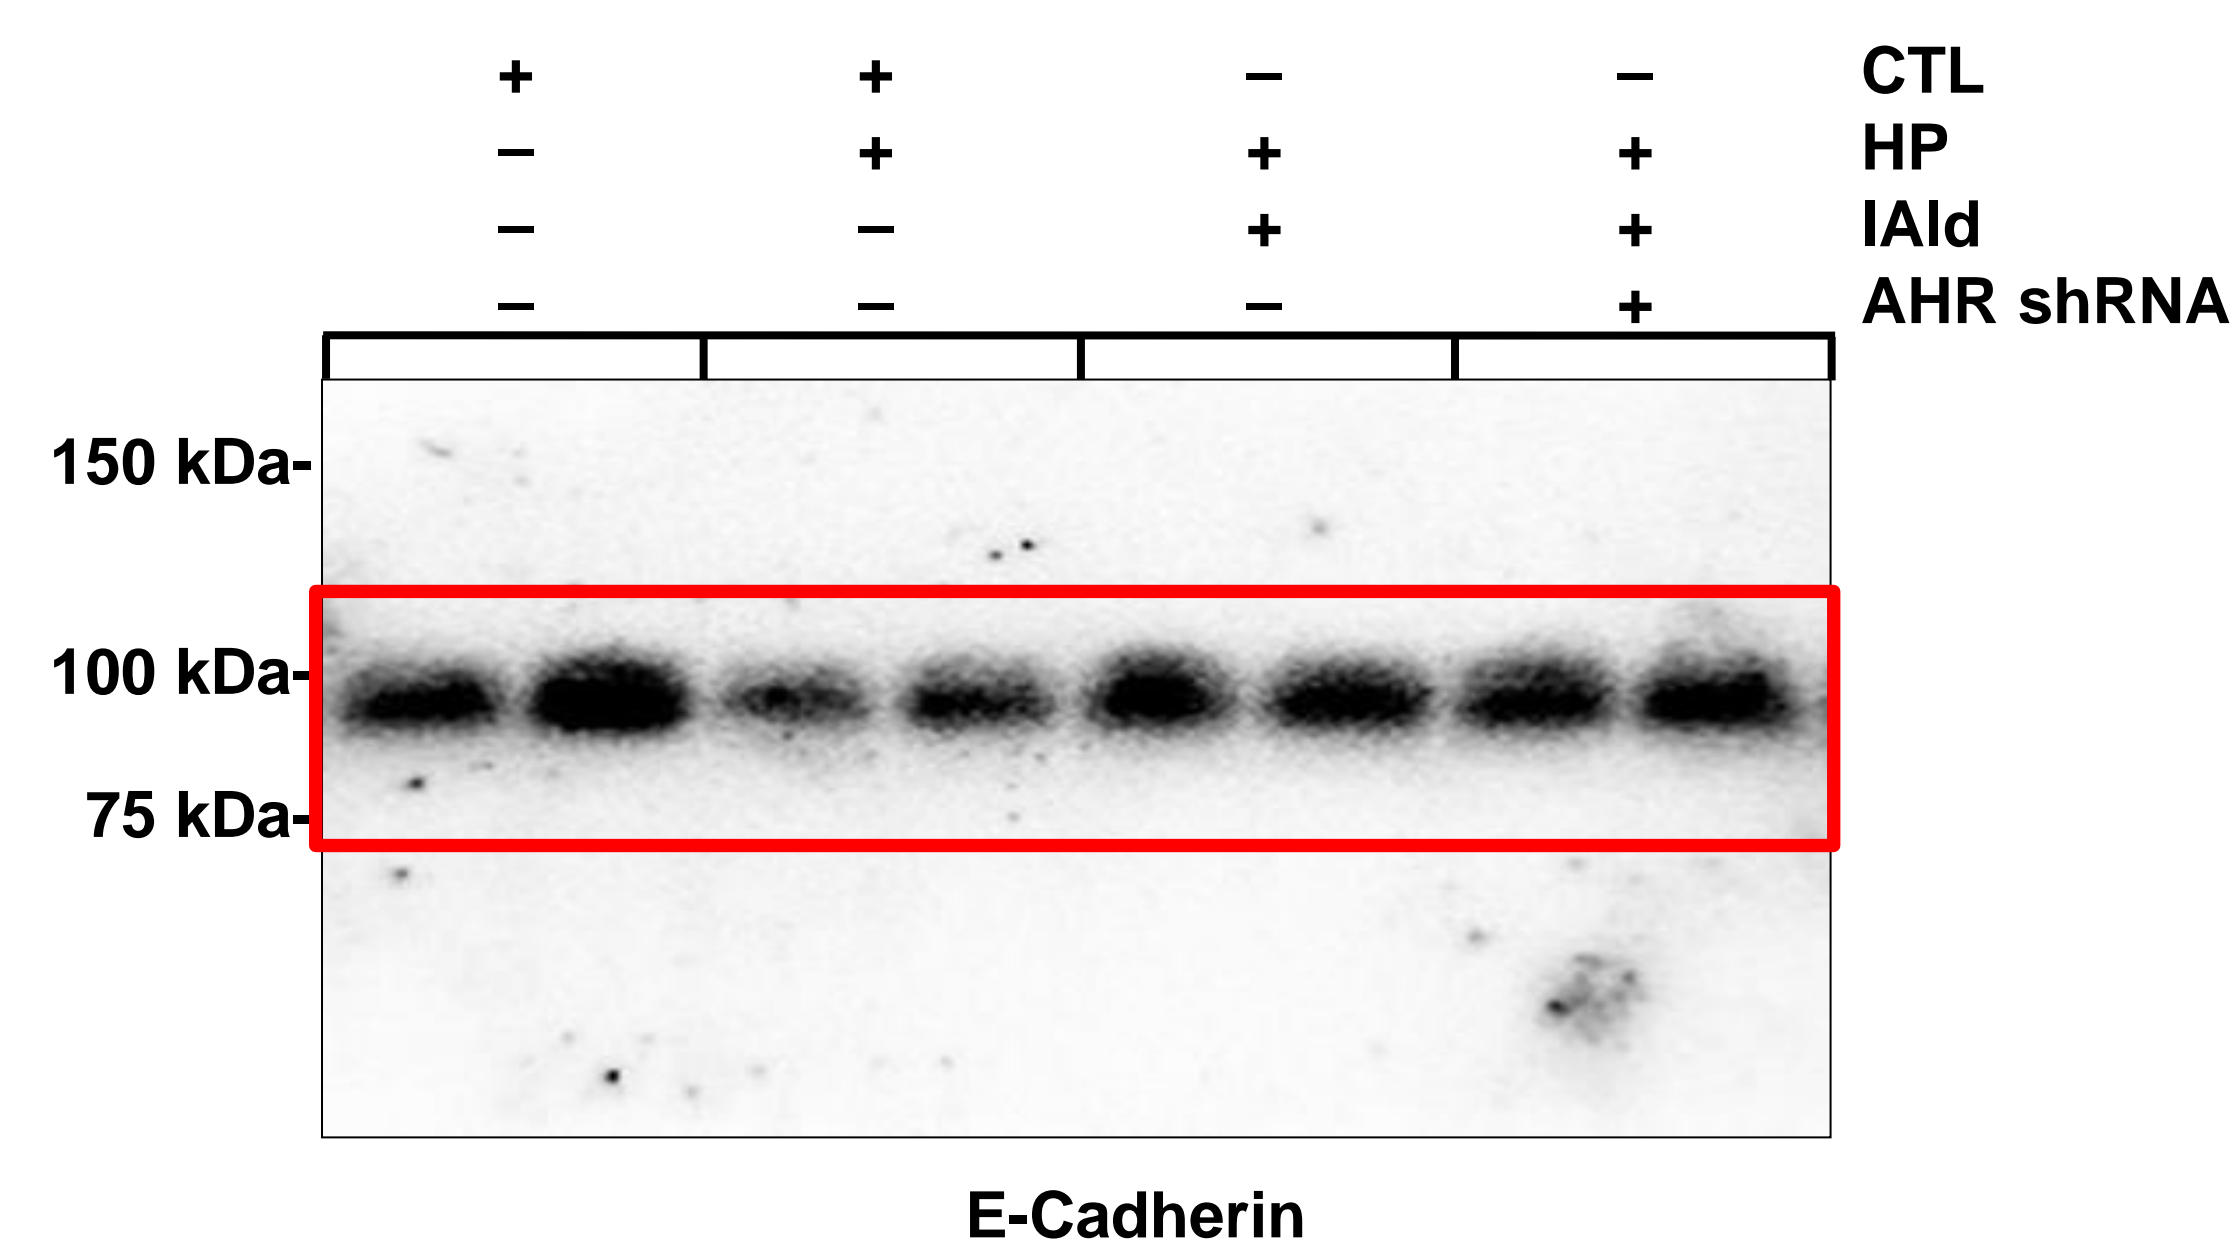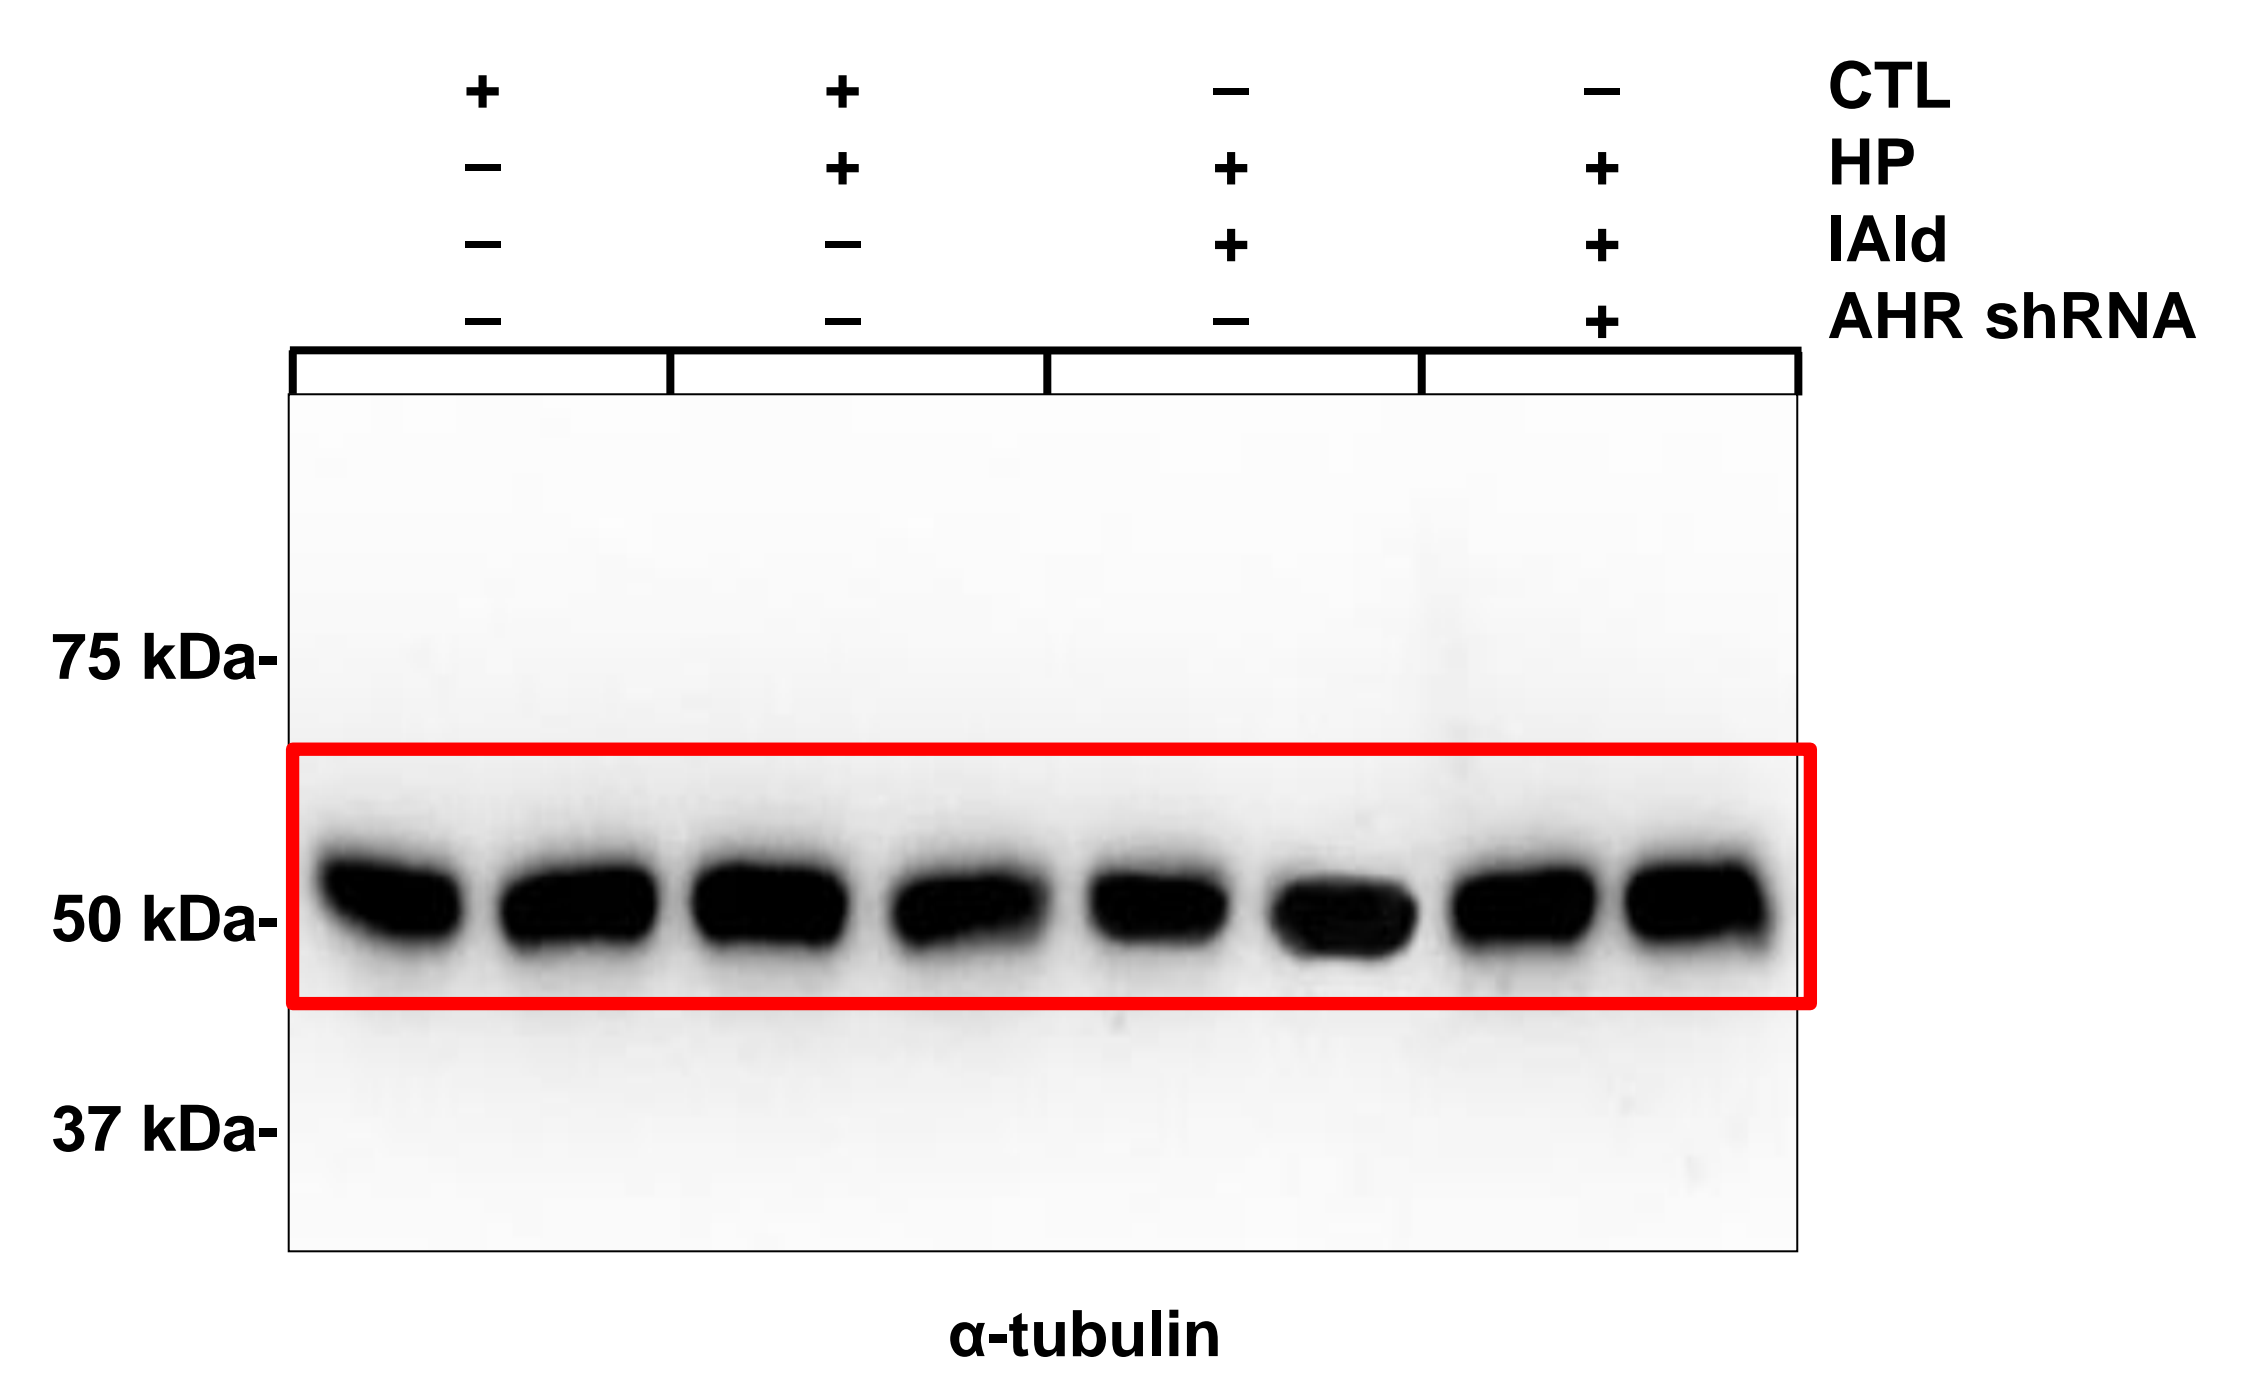

Figure S14b

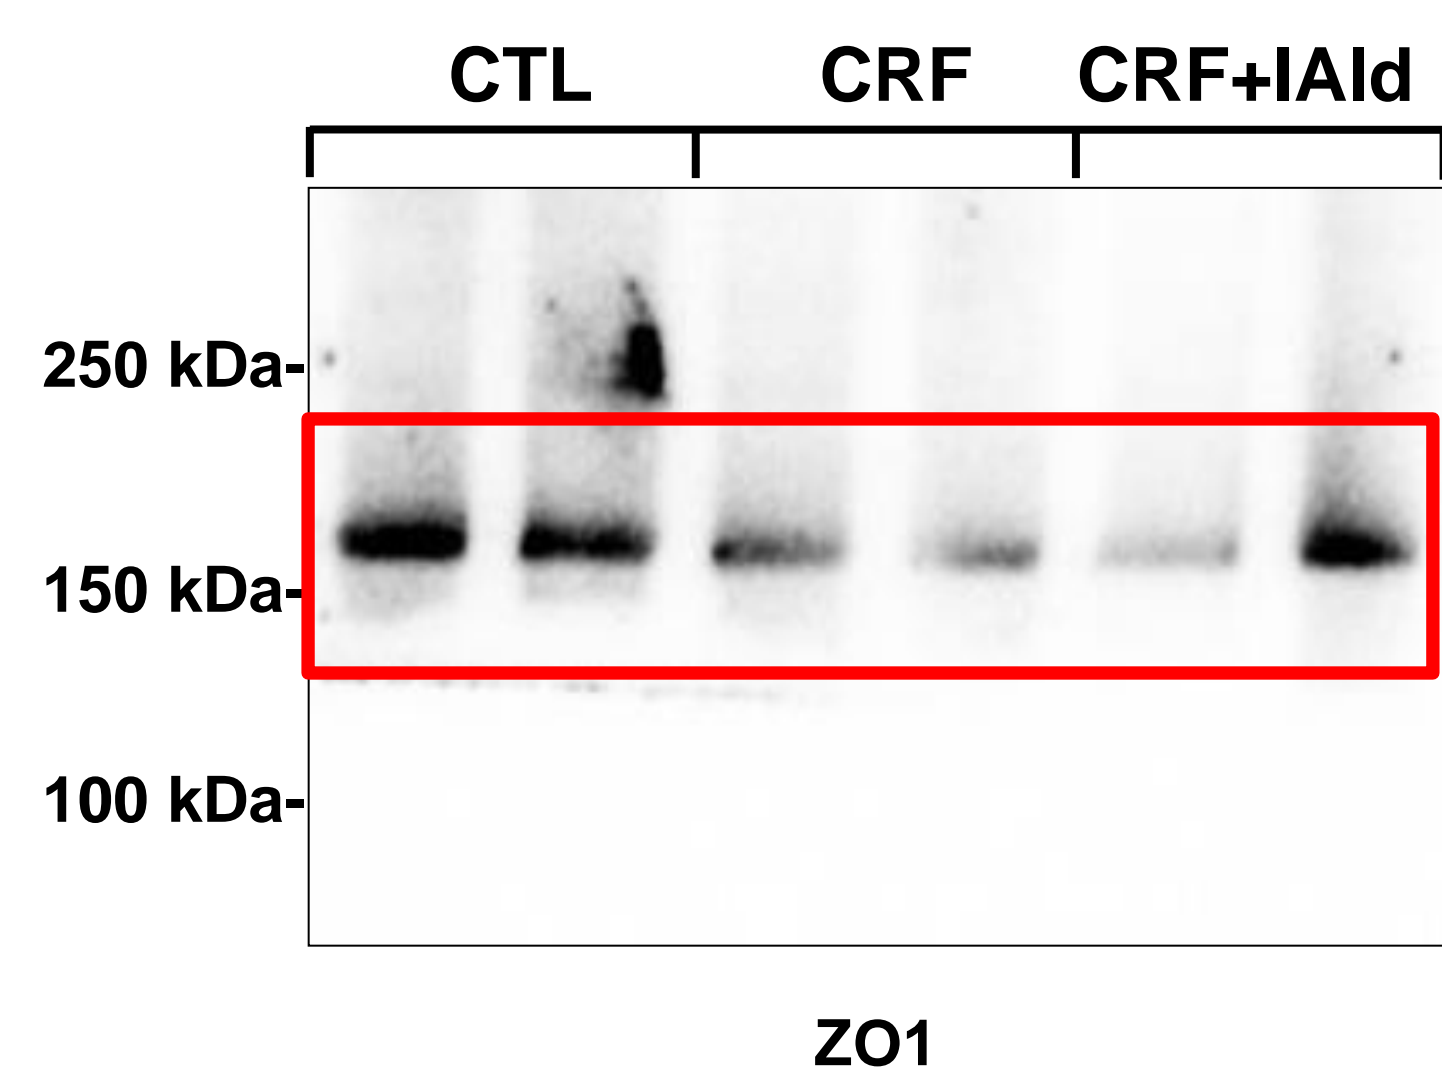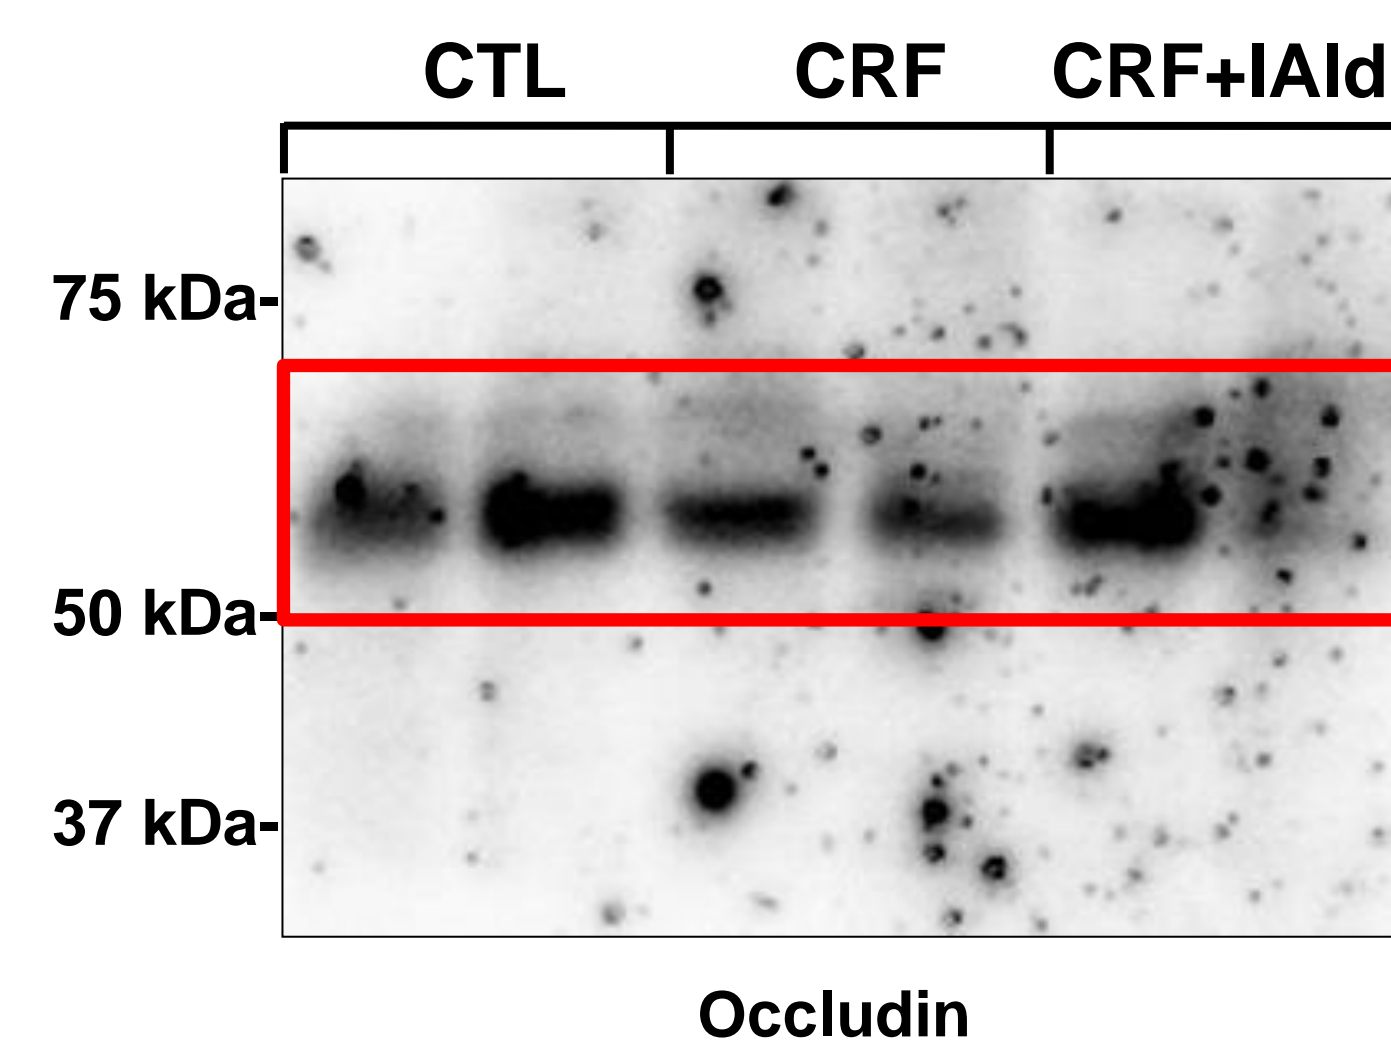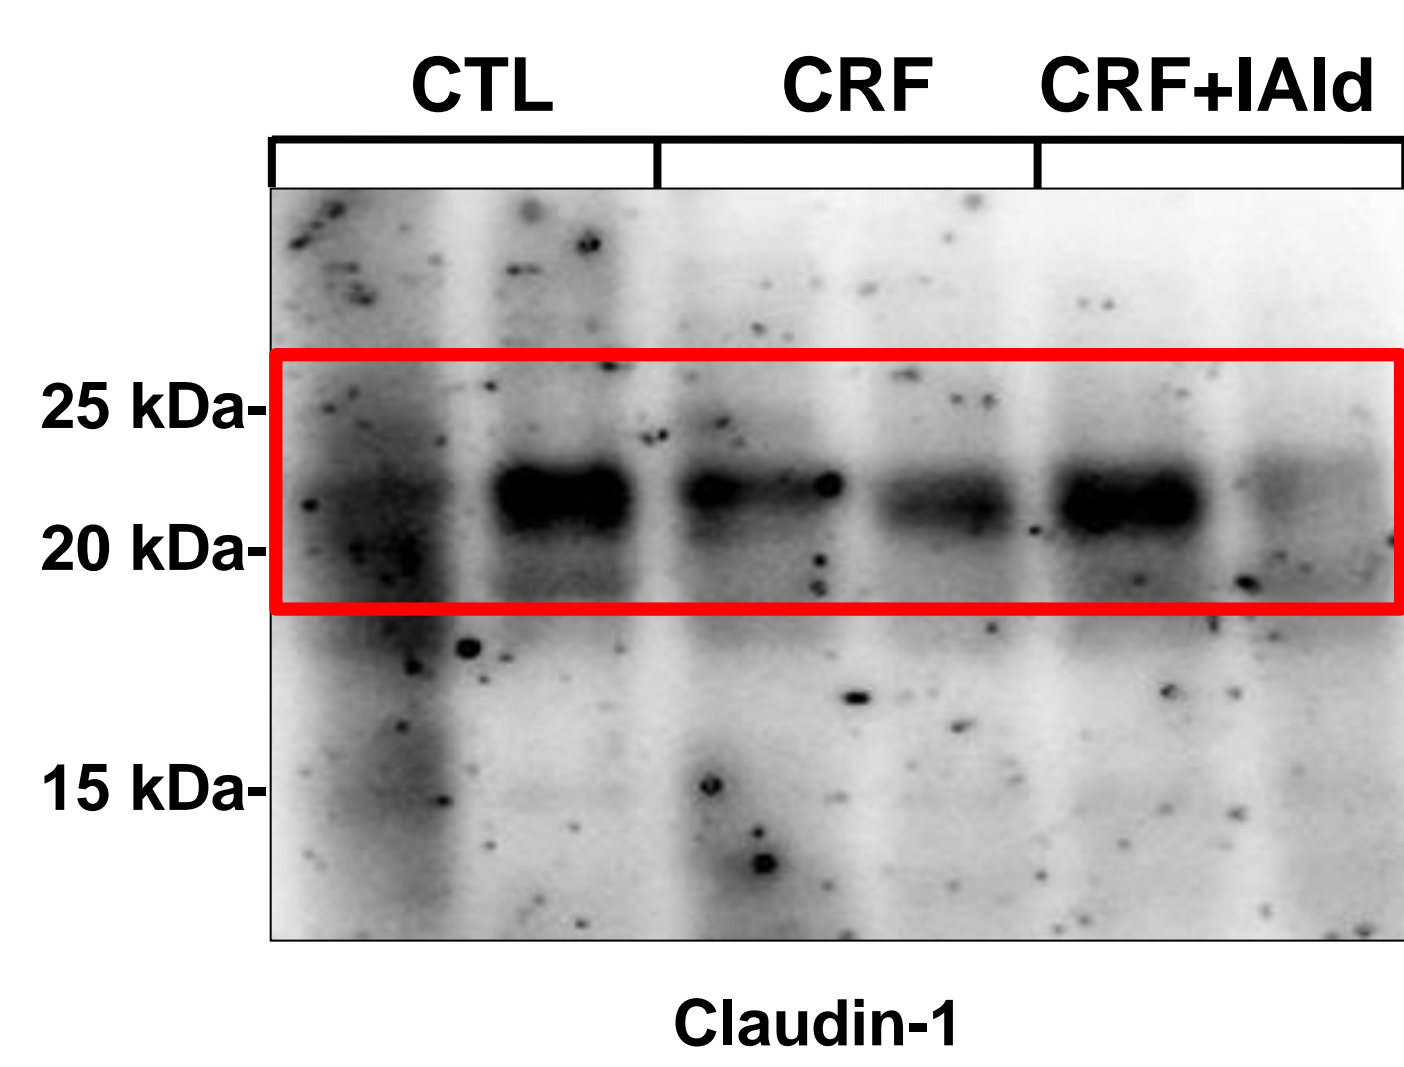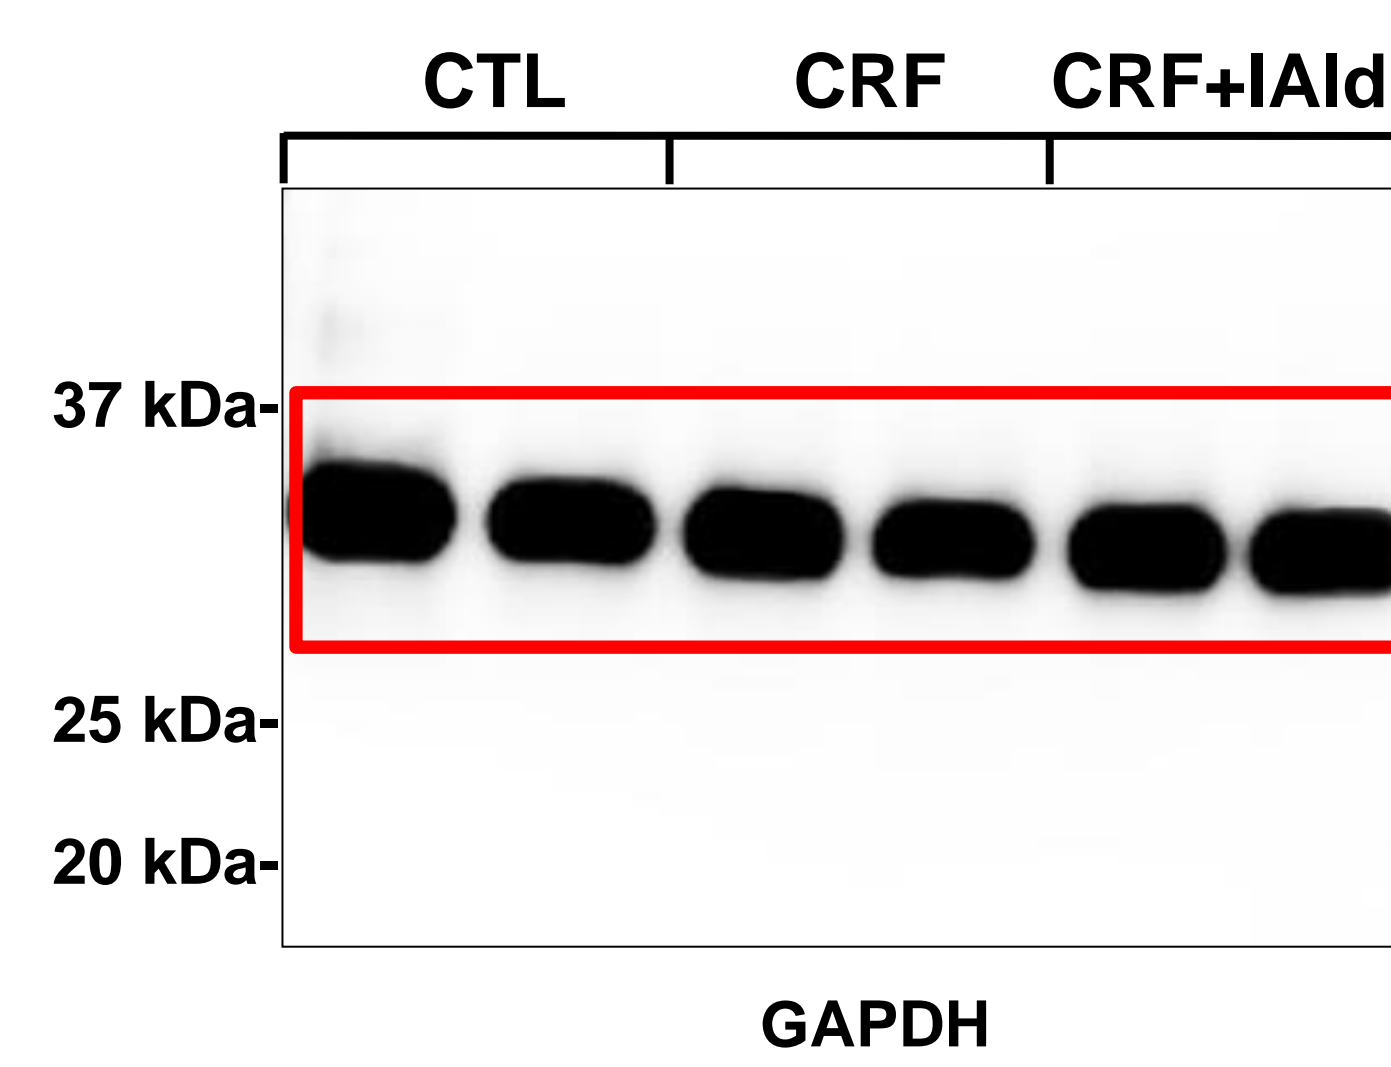

Supplement: 41392_2024_1913_MOESM2_ESM.pdf [file 41392_2024_1913_MOESM2_ESM.pdf]
